# Supplementary material
Source: PubMed Central journal article supplement (PMC2688468)
Supplement: NIHMS112056-supplement-2_si_002.pdf [file NIHMS112056-supplement-2_si_002.pdf]

**Synthesis of Fused-Ring and Attached-Ring Bis-Tetrahydrofurans via Pd-Catalyzed Carboetherification**

**Amanda F. Ward and John P. Wolfe\***

*Department of Chemistry, University of Michigan, 930 N. University Avenue, Ann Arbor, Michigan 48109-1055*

**Supporting Information (continued).**

**<sup>1</sup>H and <sup>13</sup>C NMR spectra for new compounds in Tables 1–2, eq 4, and Scheme 2.**

Std proton

File: aw1-207-hnmr  
Pulse Sequence: s2pul  
Solvent: c6d6  
Ambient temperature  
Operator: amanfan  
File: aw1-207-hnmr  
INOVA-400 "Kr.chem.lsa.umich.edu"

Relax. delay 0.500 sec  
Pulse 45.0 degrees  
Acq. time 3.000 sec  
Width 6399.5 Hz  
8 repetitions  
OBSERVE H1, 399.9650005 MHz  
DATA PROCESSING  
Line broadening 0.2 Hz  
F1 size 65536  
Total time 0 min, 35 sec  
Acquisition date: Sep 29 2008

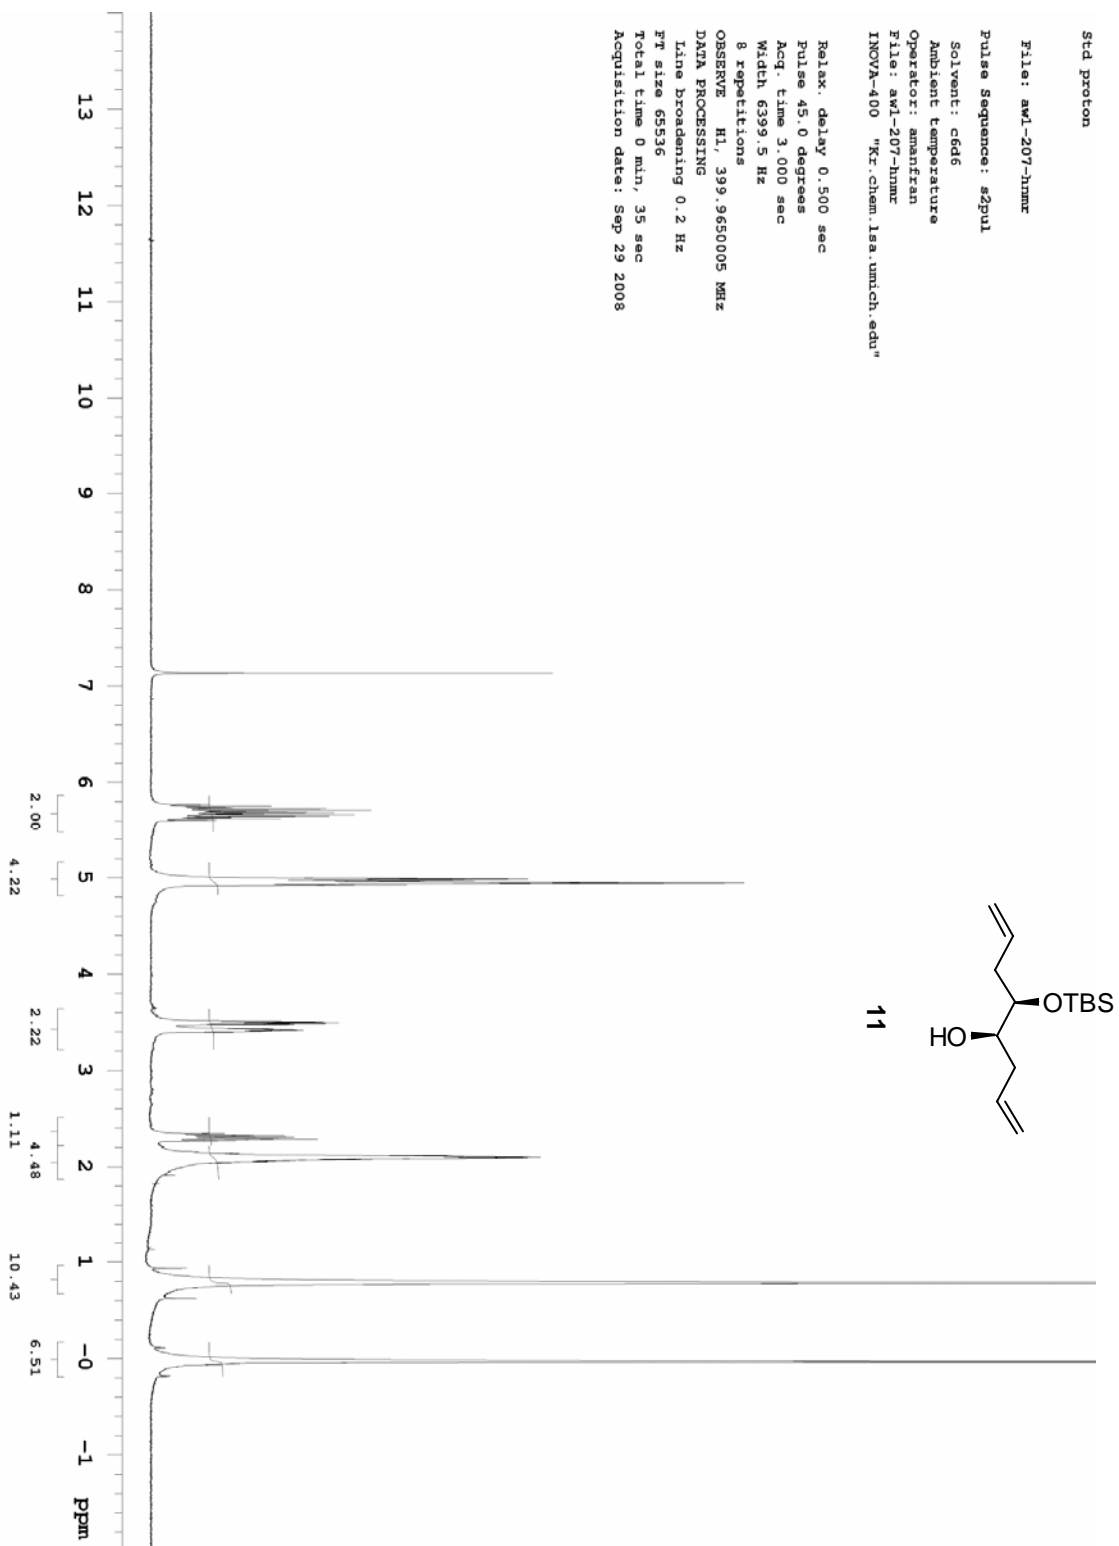

Std Carbon

File: aw1-207-cnmr  
 Pulse Sequence: szpul  
 Solvent: ccd6  
 Ambient temperature  
 Operator: amnifran  
 File: aw1-207-cnmr  
 INOVA-400 "Kr.chem.1sa.umich.edu"

Relax. delay 0.100 sec  
 Pulse 30.0 degrees  
 Acq. time 1.300 sec  
 Width 24140.0 Hz  
 304 repetitions  
 OBSERVE C13, 100.5712794 MHz  
 DECOUPLE H1, 399.9670004 MHz  
 Power 39 dB  
 continuously on  
 WALTZ-16 modulated  
 DATA PROCESSING  
 Line broadening 0.8 Hz  
 FT size 65536  
 Total time 7 min, 8 sec  
 Acquisition date: Sep 29 2008

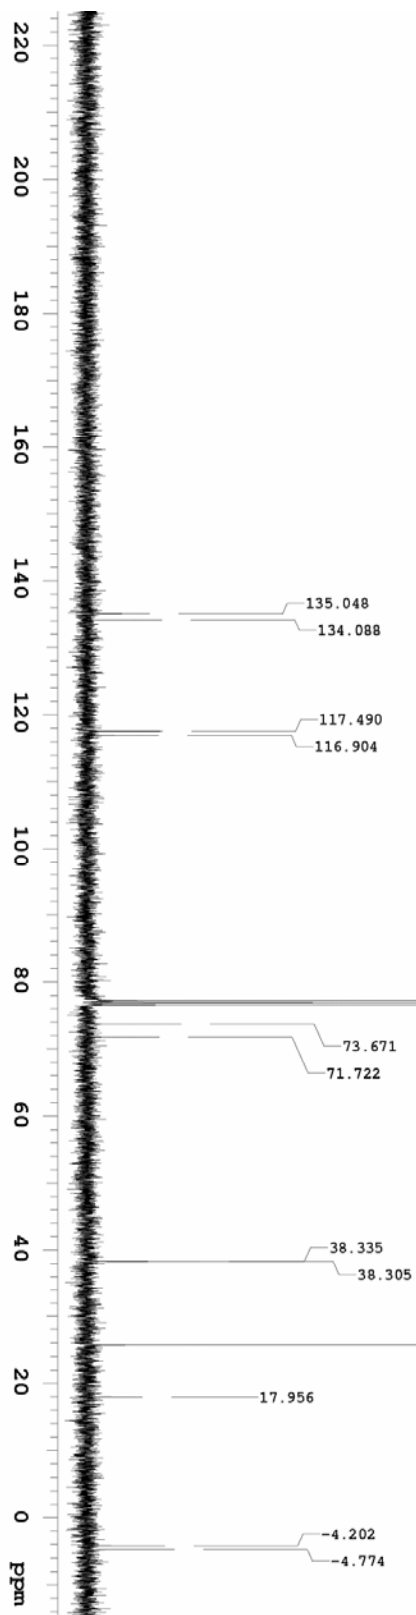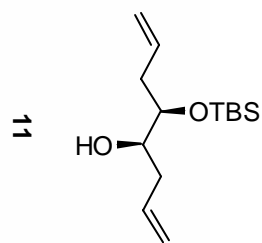

## STANDARD PROTON PARAMETERS

File: aw1-166

Pulse Sequence: szpul

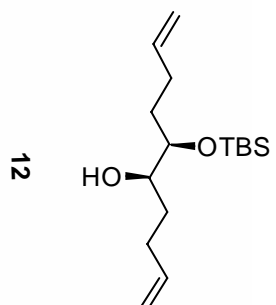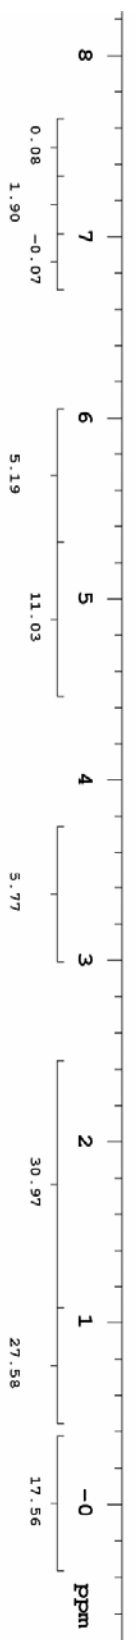

## STANDARD PROTON PARAMETERS

File: aw1-166-HMR  
 Pulse Sequence: szpul  
 Solvent: cdcl3  
 Temp: 22.0 C / 295.1 K  
 Operator: amantran  
 File: aw1-166-HMR  
 VNMR-400 "K.chem.lsa.umich.edu"

Relax. delay 1.000 sec  
 Pulse 45.0 degrees  
 Acq. time 1.285 sec  
 Width 25510.2 Hz  
 144 repetitions  
 OBSERVE C13, 100.4641428 MHz  
 DECOUPLE H1, 399.5409236 MHz  
 Power 33 dB  
 continuously on  
 WALTZ-16 modulated  
 DATA PROCESSING  
 Line Broadening 0.5 Hz  
 F2 size 65536  
 Total time 5 min, 30 sec  
 Acquisition date: Aug 11 2008

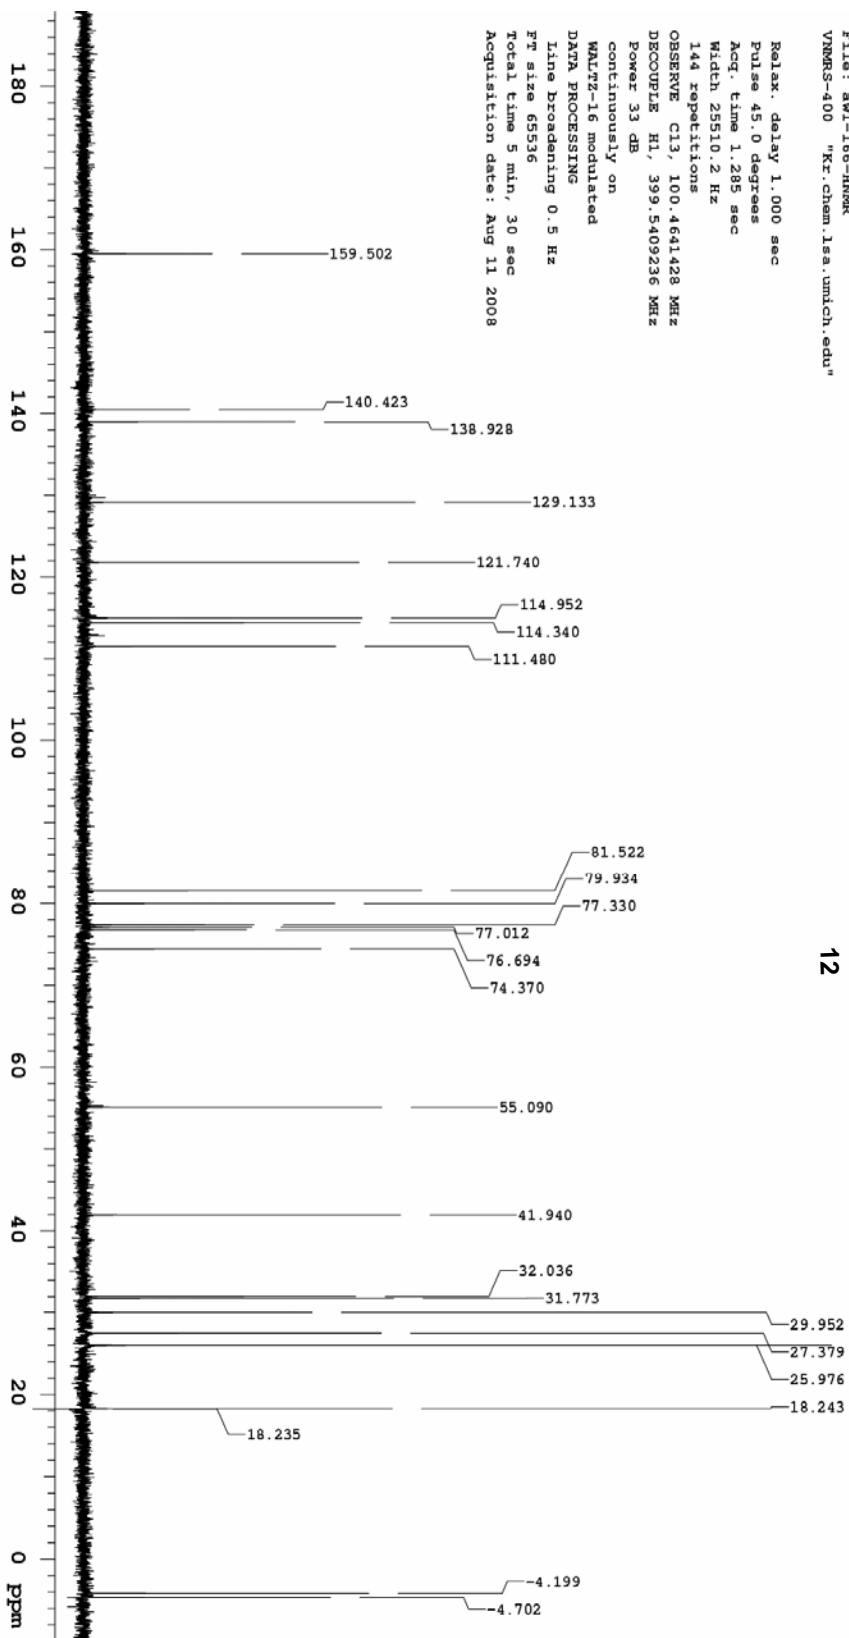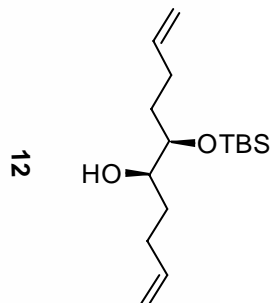

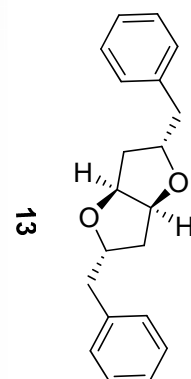

VARIAN 

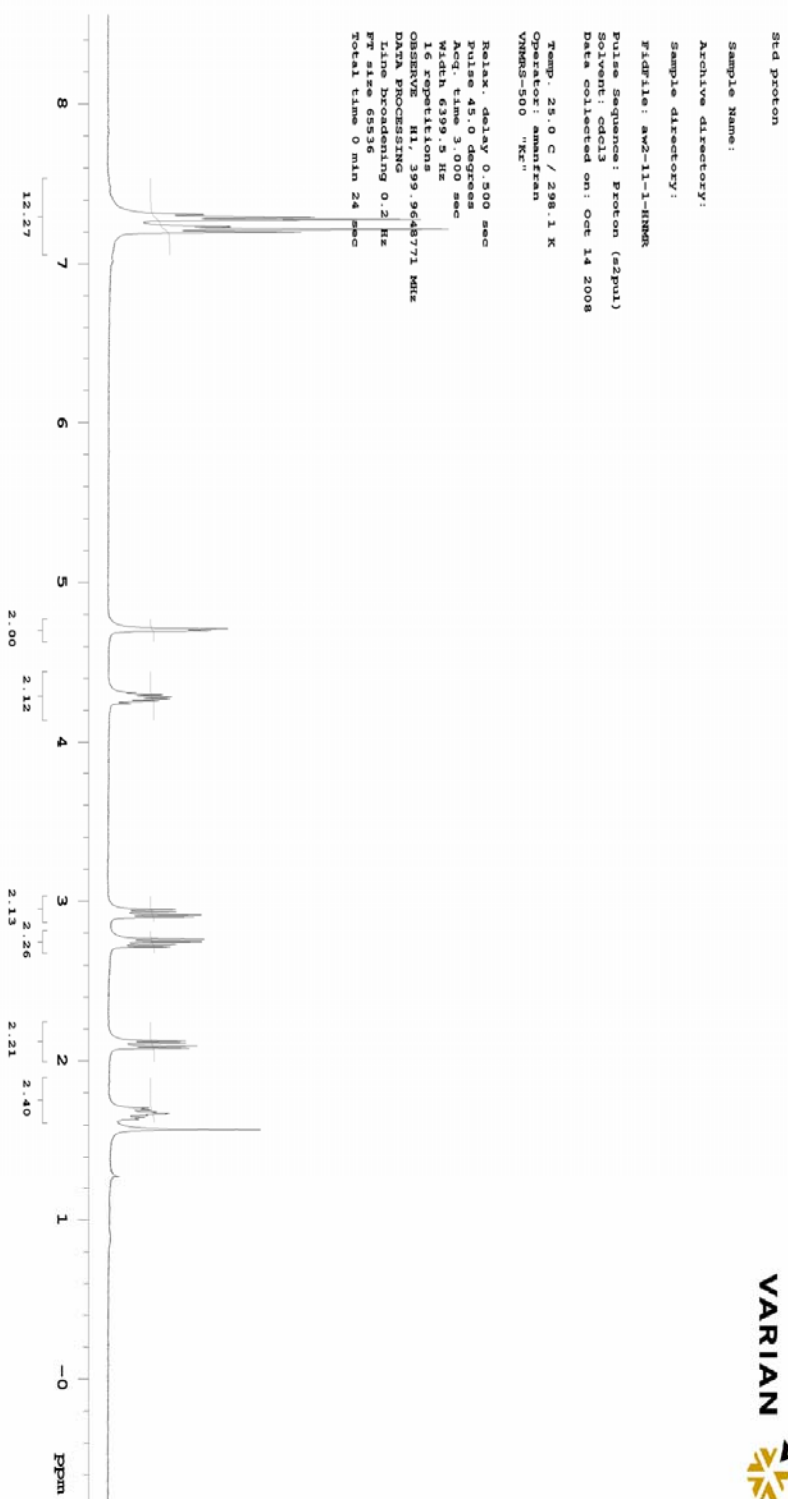

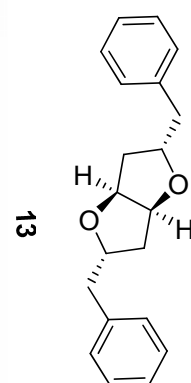

Std Carbon

VARIAN 

Sample Name:

Archive directory:

Sample directory:

Filefile: aw2-11-1-CNMR

Pulse Sequence: Carbon (s2pul)

Solvent: cdcl3

Data collected on: Oct 14 2008

Temp: 25.0 C / 298.1 K

Operator: rmanfren

VMRS-500 "KX"

Relax: delay 0.100 sec  
 Acq: 30  
 Acq time 1.300 sec  
 Width 24140.0 Hz  
 176 repetitions  
 OBSERVE C13, 100.5712703 MHz  
 DECOUPLE H1, 399.969644 MHz  
 power 39 dB  
 continuously on  
 WALTZ-16 modulated  
 DATA PROCESSING  
 Line broadening 0.8 Hz  
 Zero filling 2  
 Total time 0 min 24 sec

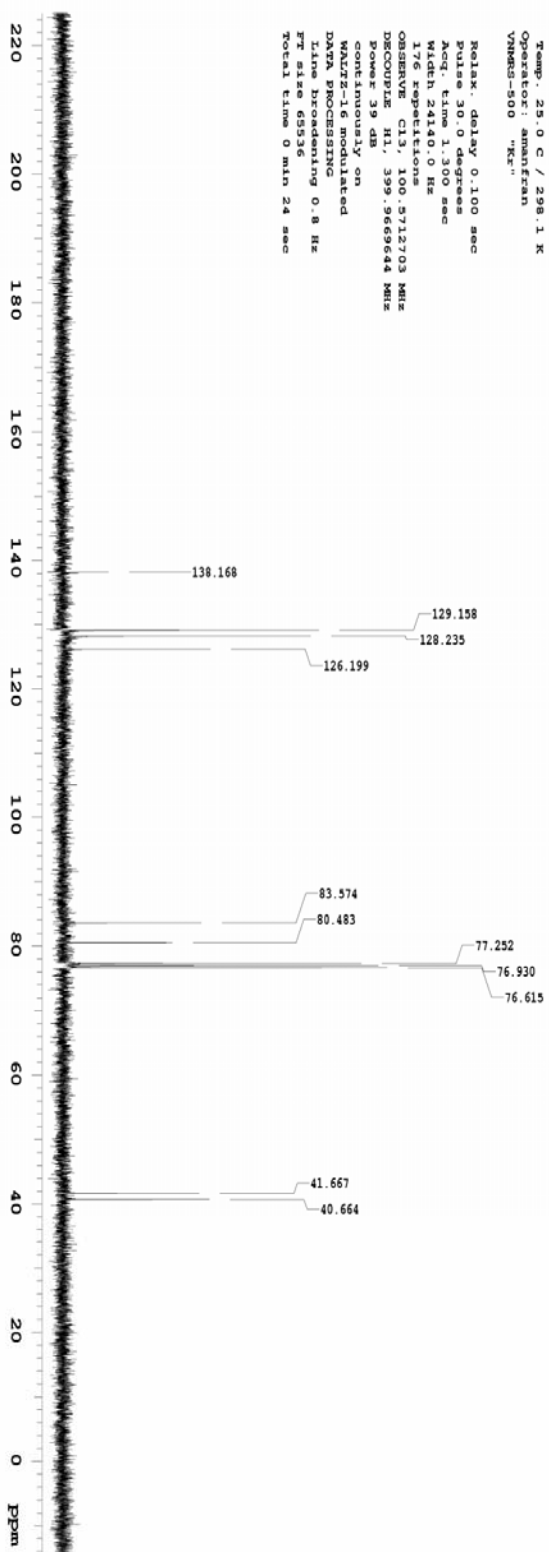

STANDARD 1H OBSERVE - profile

File: aw2-1-1-1

Pulse Sequence: szpu1

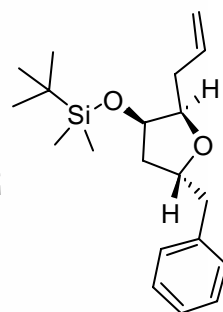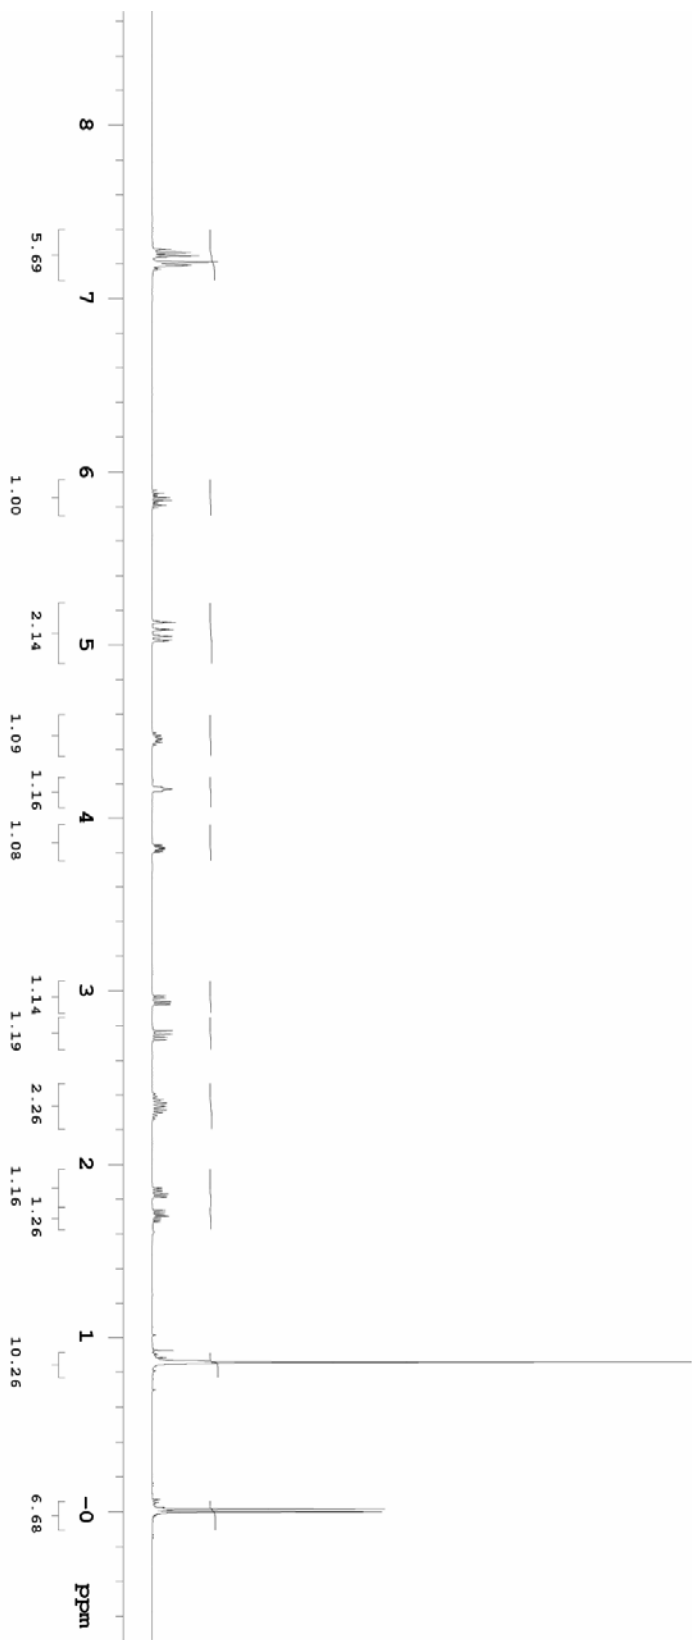



Std Carbon

File: aw1-107CNMR

Pulse Sequence: s2pul

Solvent: cdcl3

Ambient temperature

Operator: amanfran

File: aw1-107CNMR

INOVA-400 "Kr.chem.lsa.umich.edu"

Relax. delay 0.100 sec

Pulse 30.0 degrees

Acq. time 1.300 sec

Width 24140.0 Hz

432 repetitions

OBSERVE C13, 100.5712703 MHz

DECOUPLE H1, 399.9669644 MHz

Power 39 dB

continuously on

WALTZ-16 modulated

DATA PROCESSING

line broadening 0.8 Hz

FT size 65536

Total time 10 min, 8 sec

Acquisition date: Jun 18 2008

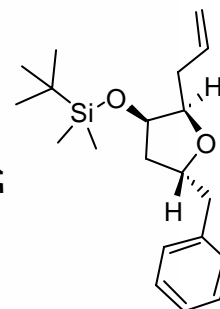

15a

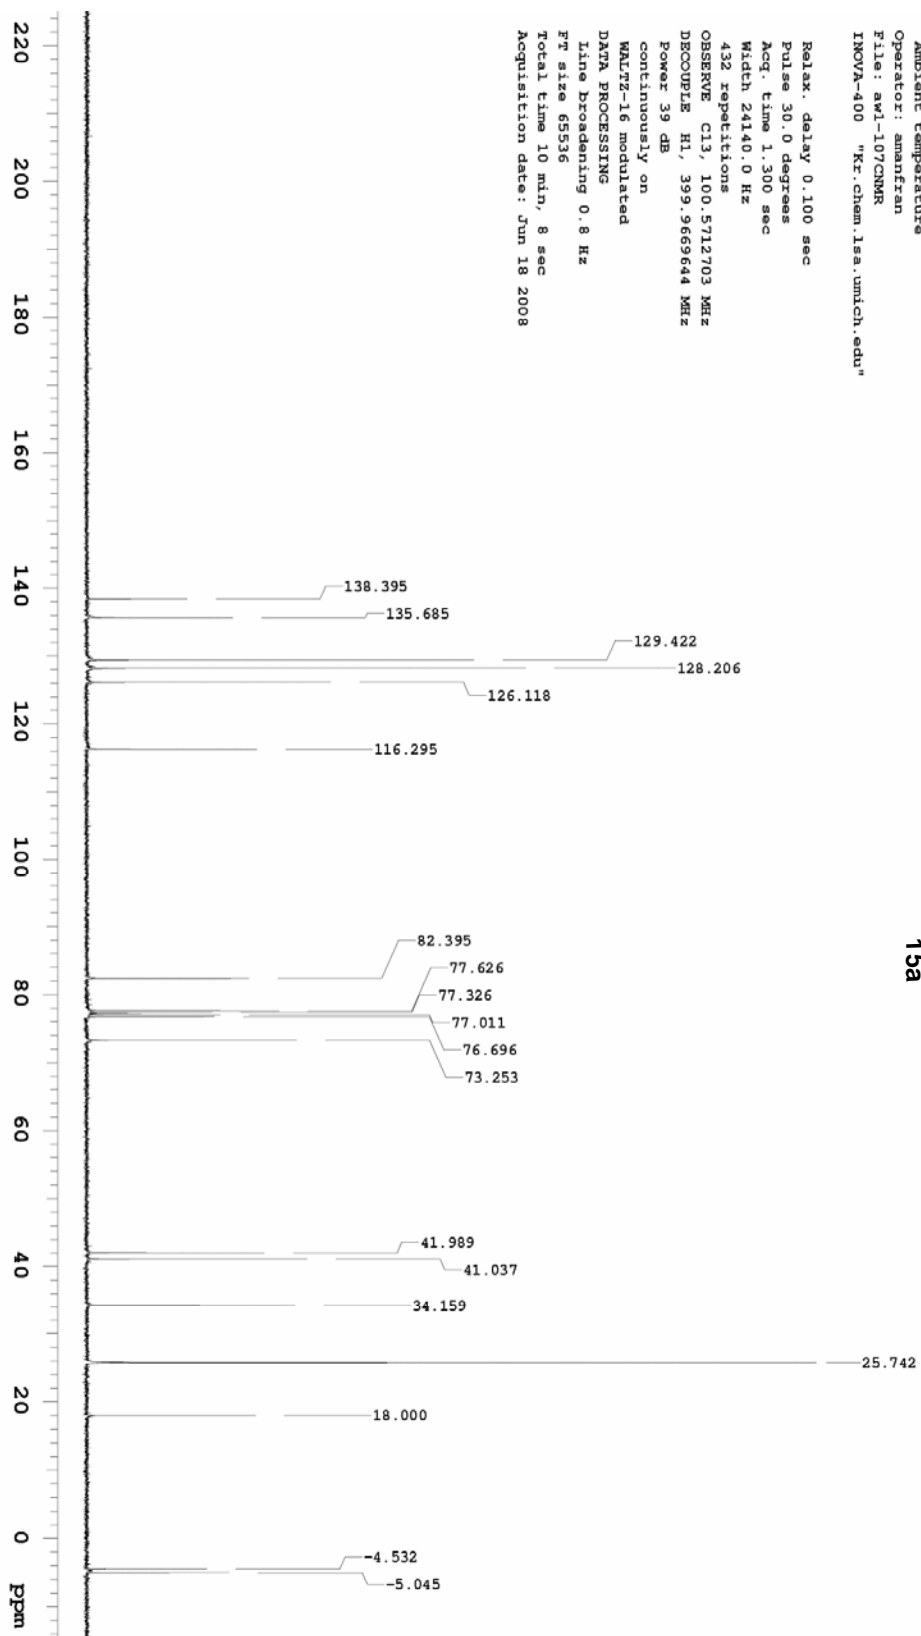

## STANDARD PROTON PARAMETERS

File: awl-205-1-1

Pulse Sequence: szpul

Solvent: cdcl3

Ambient temperature

Operator: amanfran

File: awl-205-1-1

VNMR5-401 "Kr.chem.1sa.umich.edu"

Relax. delay 1.000 sec

Pulse 45.0 degrees

Acq. time 2.556 sec

Width 6410.3 Hz

8 repetitions

OBSERVE H1, 400.5297680 MHz

DATA PROCESSING

FT size 32768

Total time 0 min, 35 sec

Acquisition date: Oct 3 2008

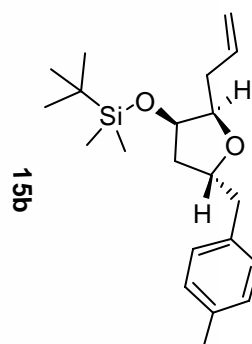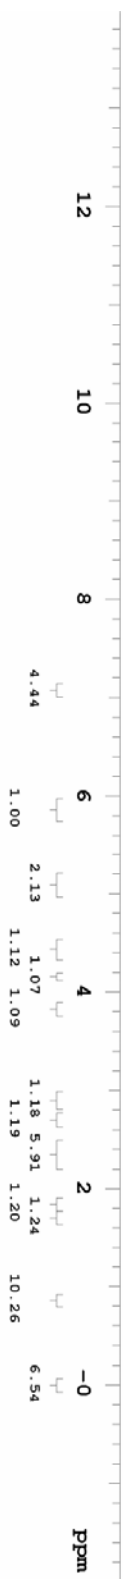

Std Carbon

File: aw1-119CNMR

Pulse Sequence: s2pul

Solvent: cdcl3

Ambient temperature

Operator: amanfran

File: aw1-119CNMR

INOVA-400 "K.chem.lsa.umich.edu"

Relax. delay 0.100 sec

Pulse 30.0 degrees

Acq. time 1.300 sec

Width 24140.0 Hz

336 repetitions

OBSERVE C13, 100.5712703 MHz

DECOUPLE H1, 399.9669644 MHz

Power 39 dB

continuously on

WALTZ-16 modulated

DATA PROCESSING

line broadening 0.8 Hz

FT size 65536

Total time 7 min, 53 sec

Acquisition date: Jun 26 2008

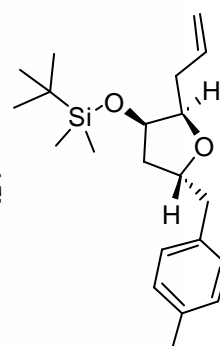

15b

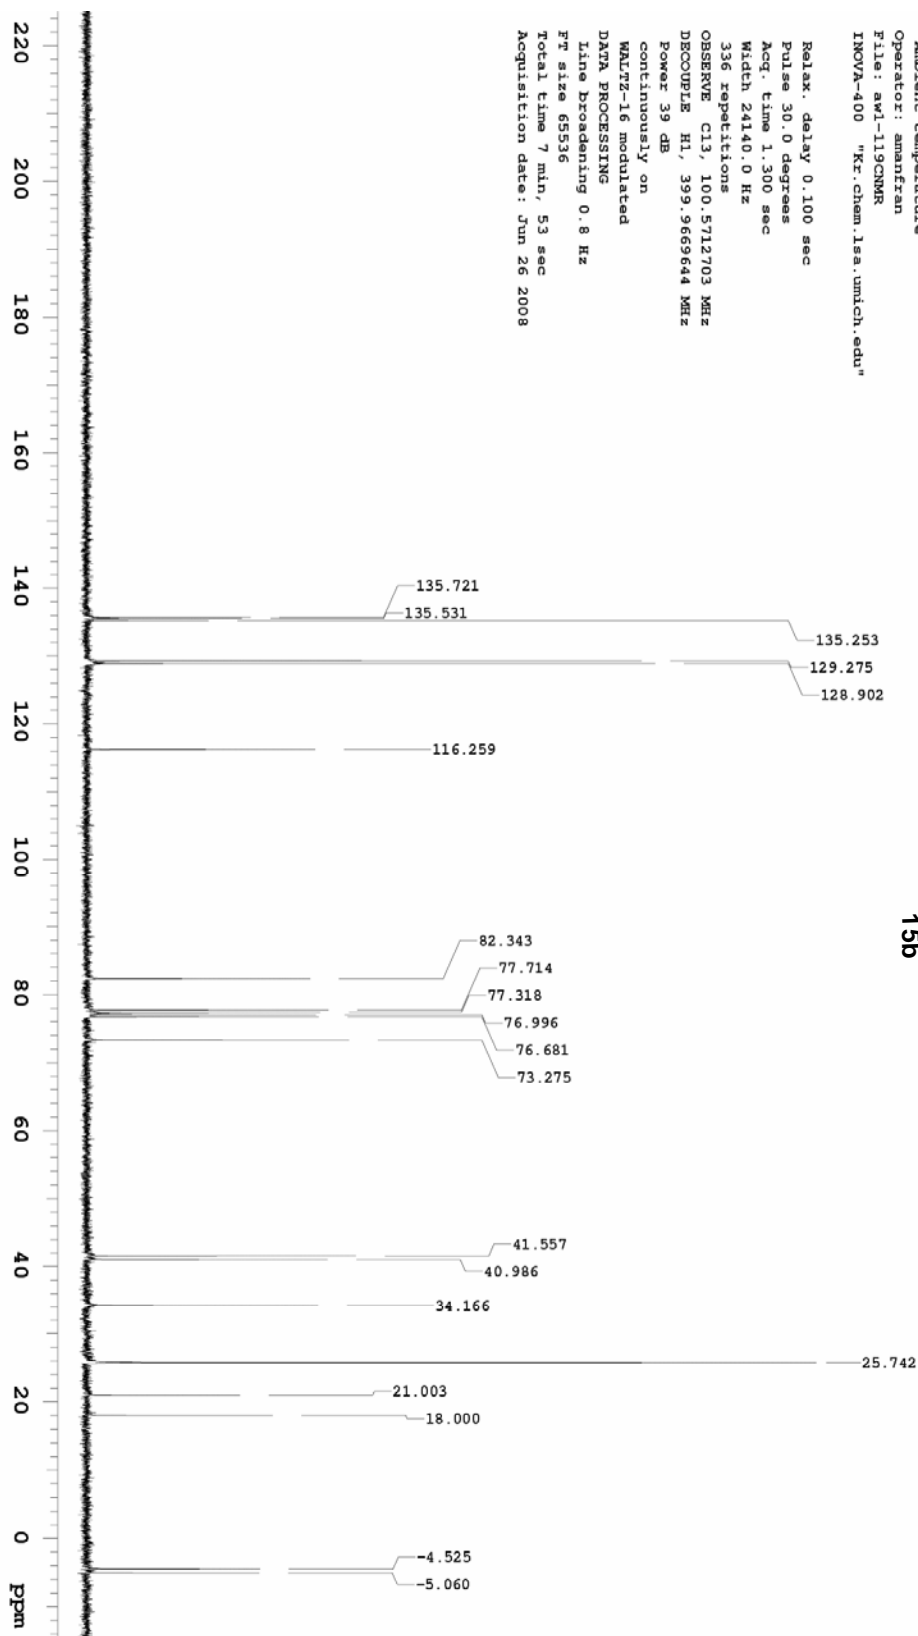

## STANDARD PROTON PARAMETERS

File: aw2-8-1-HMR

Pulse Sequence: szpul

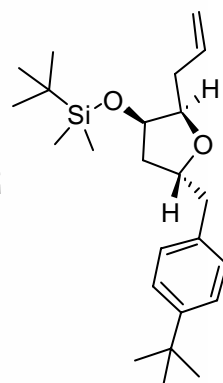

15c

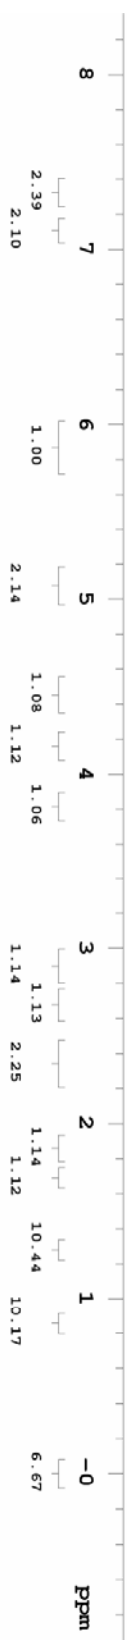

## STANDARD PROTON PARAMETERS

File: aw2-8-1-CNMR  
 Pulse Sequence: szpul  
 Solvent: toluene  
 Ambient temperature  
 Operator: amanfran  
 File: aw2-8-1-CNMR  
 VNMR5-400 "Kr.chem.1sa.umich.edu"

Relax. delay 1.000 sec  
 Pulse 45.0 degrees  
 Acq. time 1.285 sec  
 Width 25510.2 Hz  
 128 repetitions  
 OBSERVE C13, 100.4641579 MHz  
 DECOUPLE H1, 399.5409835 MHz  
 Power 33 dB  
 continuously on  
 WALTZ-16 modulated  
 DATA PROCESSING  
 Line broadening 0.5 Hz  
 FT size 65536  
 Total time 4 min, 53 sec  
 Acquisition date: Oct 10 2008

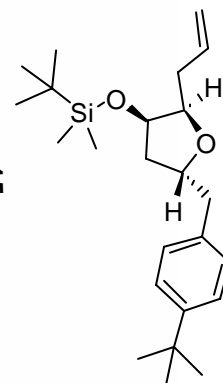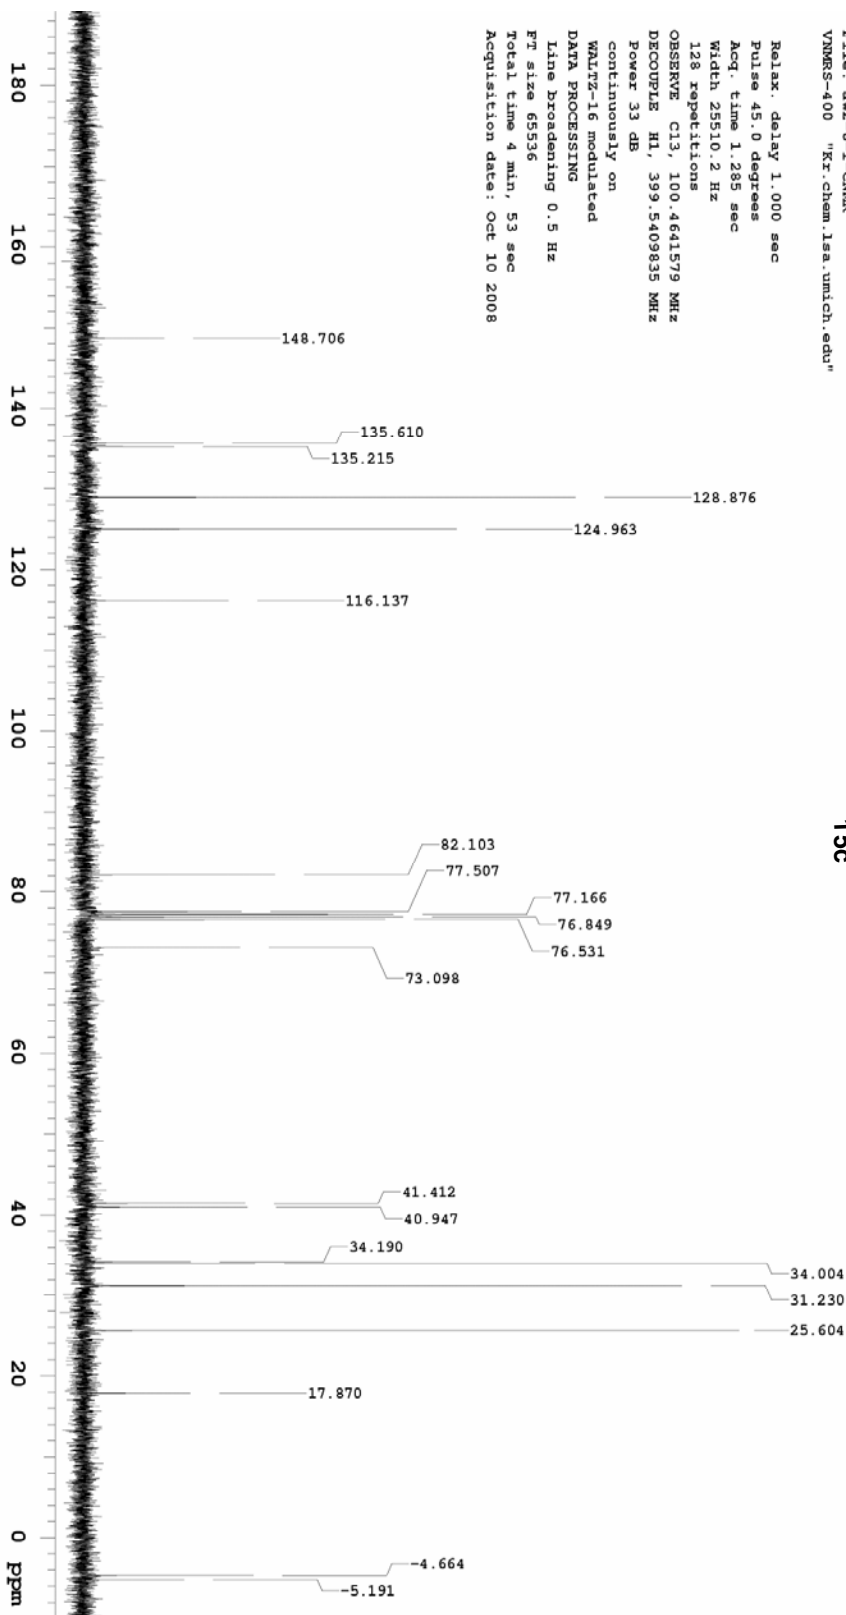

Std proton

File: gc05y

Pulse Sequence: gc05y

Solvent: c6d6

Temp: 25.0 C / 298.1 K

Operator: amanfran

INOVA-400 "Zr.Chem.LSA.IWhitCh.Edu"

Relax. delay 1.301 sec  
 Acq. time 0.160 sec  
 Width 6399.5 Hz  
 2D Width 6399.5 Hz  
 Single scan  
 128 increments  
 OBSERVE H1, 399.9650005 MHz  
 DATA PROCESSING  
 Sine bell 0.080 sec  
 F1 DATA PROCESSING  
 Sine bell 0.040 sec  
 FT size 2048 x 2048  
 Total time 3 min., 33 sec  
 Acquisition date: Oct 10 2008

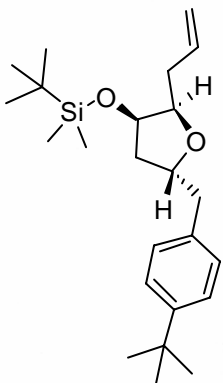

15c

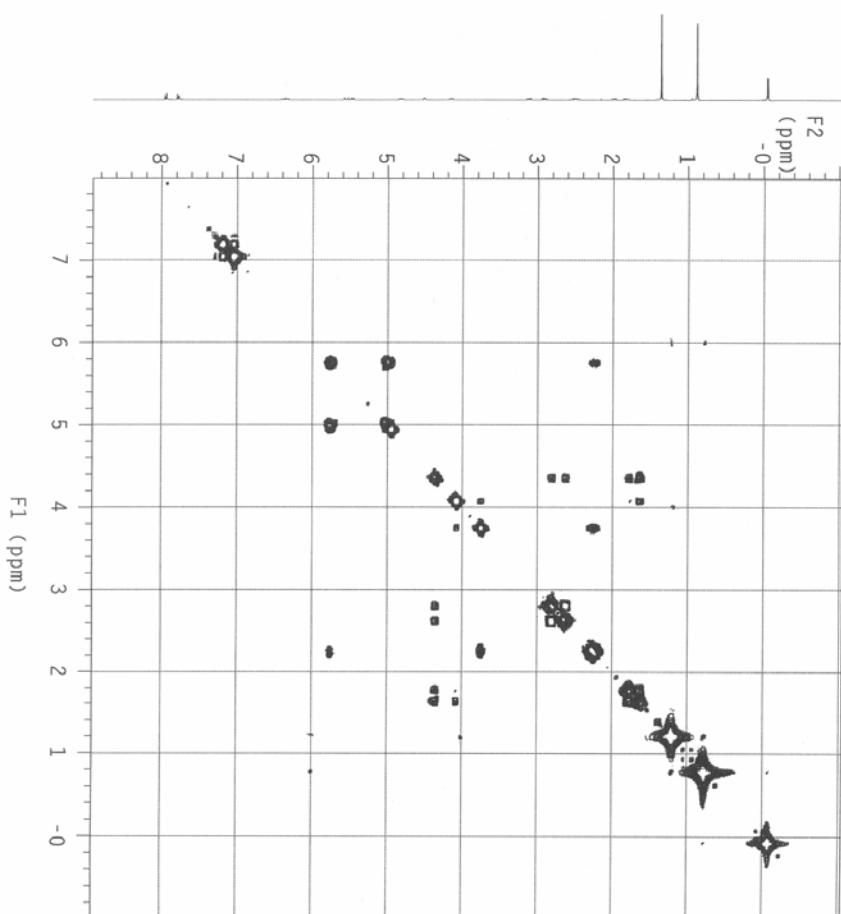

## STANDARD PROTON PARAMETERS

File: awl-40-nosey

Pulse Sequence: NOESY

Solvent: cdcl3

Ambient temperature

Operator: amanfran

File: awl-40-nosey

VNMR5-400 "Kr.chem.1sa.umich.edu"

Relax. delay 1.000 sec

Acq. time 0.150 sec

Width 3612.7 Hz

2D Width 3612.7 Hz

8 repetitions

2 x 256 increments

OBSERVE H1, 399.5389365 MHz

DATA PROCESSING

Gauss apodization 0.069 sec

F1 DATA PROCESSING

Gauss apodization 0.065 sec

FT size 2048 x 2048

Total time 1 hr, 22 min, 44 sec

Acquisition date: Aug 17 2008

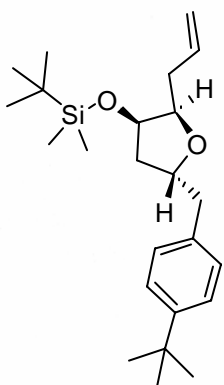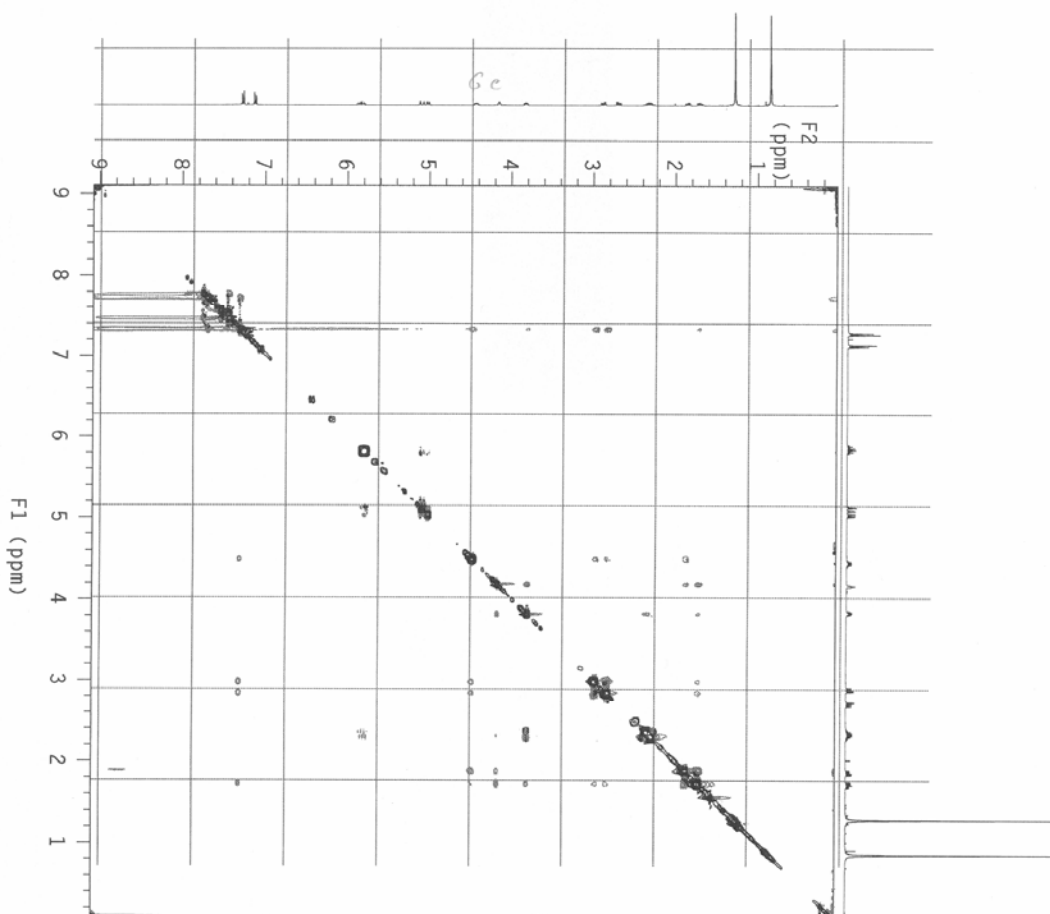

## STANDARD PROTON PARAMETERS

File: aw1-181  
 Pulse Sequence: s2pul  
 Solvent: cdcl3  
 Ambient temperature  
 Operator: amantran  
 File: aw1-181  
 VNMR-400 "Kr.chem.1sa.umich.edu"

Relax. delay 1.000 sec  
 Pulse 45.0 degrees  
 Acq. time 2.556 sec  
 Width 6410.3 Hz  
 8 repetitions  
 OBSERVE H1, 399.5389333 MHz  
 DATA PROCESSING  
 F1 size 32768  
 Total time 0 min, 35 sec  
 Acquisition date: Aug 27 2008

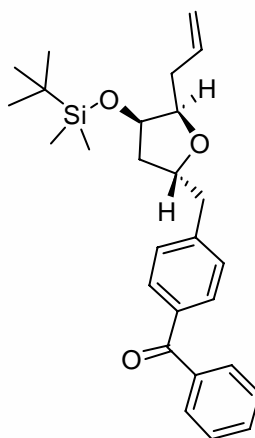

15d

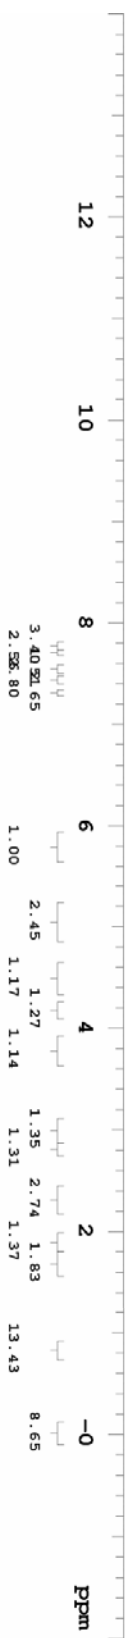



## STANDARD PROTON PARAMETERS

File: aw2-8-1-CNMR

Pulse Sequence: szpul

Solvent: toluene

Ambient temperature

Operator: amanfran

File: aw2-8-1-CNMR

VNMR-400 "K.chem.lsa.umich.edu"

Relax. delay 1.000 sec

Pulse 45.0 degrees

Acq. time 1.285 sec

Width 25510.2 Hz

128 repetitions

OBSERVE C13, 100.4641579 MHz

DECOUPLE H1, 399.5409835 MHz

Power 33 dB

continuously on

WALTZ-16 modulated

DATA PROCESSING

Line Broadening 0.5 Hz

F2 size 65536

Total time 4 min, 53 sec

Acquisition date: Oct 10 2008

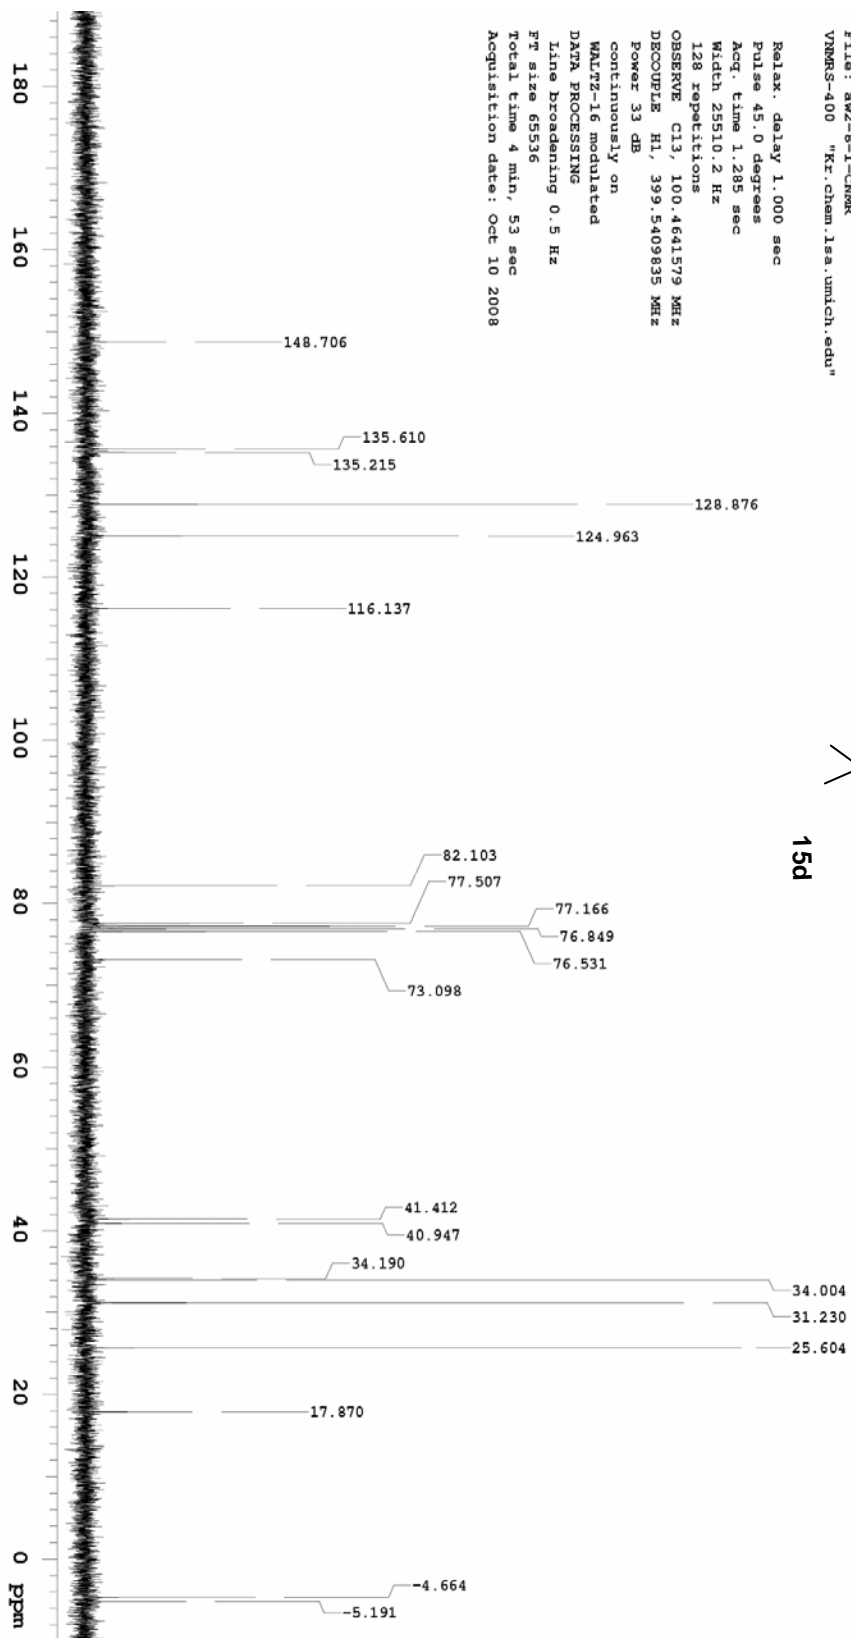

Std proton

File: aw1-171  
 Pulse Sequence: szpul  
 Solvent: cdcl3  
 Ambient temperature  
 Operator: amanfran  
 File: aw1-171  
 INOVA-400 "Kr.chem.lsa.umich.edu"

Relax. delay 0.500 sec  
 Pulse 45.0 degrees  
 Acq. time 3.000 sec  
 Width 6399.5 Hz  
 16 repetitions  
 OBSERVE H1, 399.9649645 MHz  
 DATA PROCESSING  
 Line broadening 0.2 Hz  
 FT size 65536  
 Total time 1 min, 3 sec  
 Acquisition date: Aug 15 2008

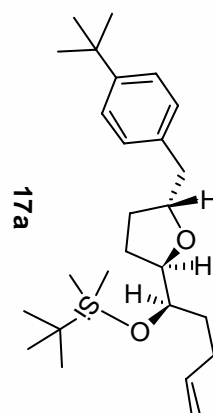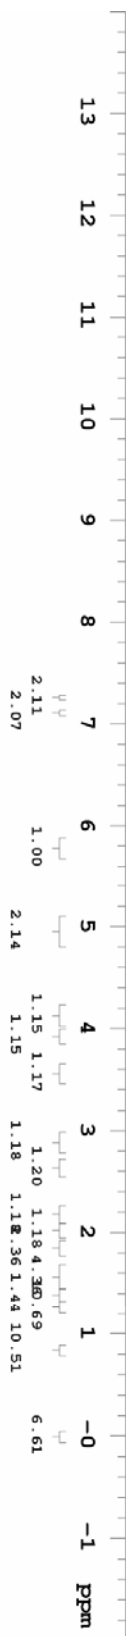

## STANDARD 1H OBSERVE

File: aw1-135CNMR  
 Pulse Sequence: s2pul  
 Solvent: CDCl3  
 Temp: 10.0 C / 283.1 K  
 Operator: amanfran  
 File: aw1-135CNMR  
 VNMR3-401 "Kr.Chem.1sa.umich.edu"

Relax. delay 1.000 sec  
 Pulse 45.0 degrees  
 Acq. time 1.285 sec  
 Width 25510.2 Hz  
 240 repetitions  
 OBSERVE C13, 100.7132880 MHz  
 DECOUPLE H1, 400.5317616 MHz  
 Power 45 dB  
 continuously on  
 WALTZ-16 modulated  
 DATA PROCESSING  
 Line broadening 0.5 Hz  
 FT size 65536  
 Total time 9 min, 10 sec  
 Acquisition date: Jul 9 2008

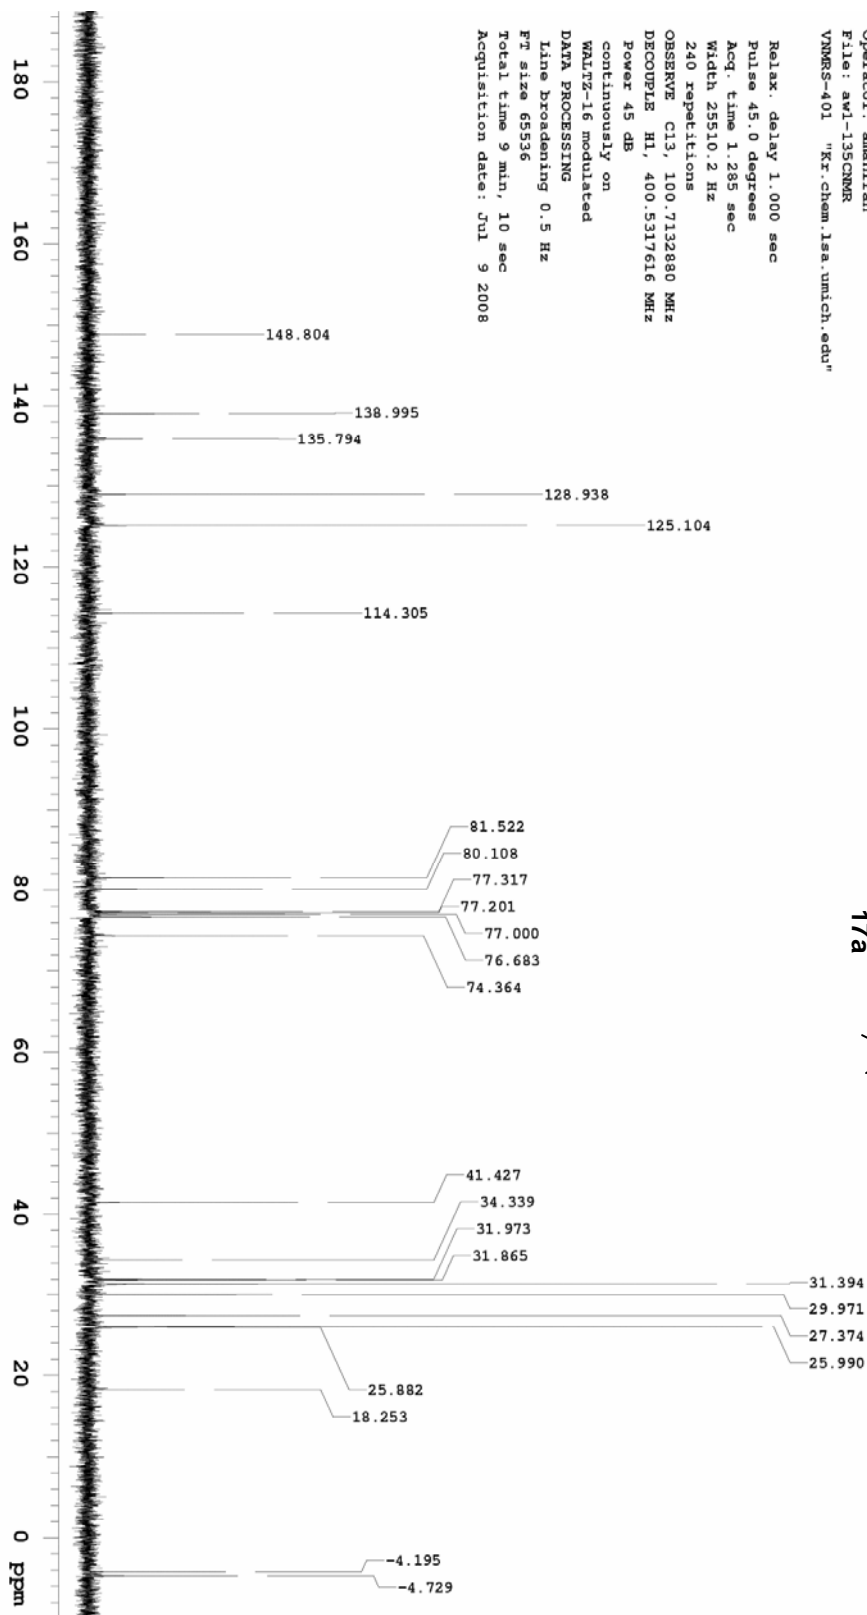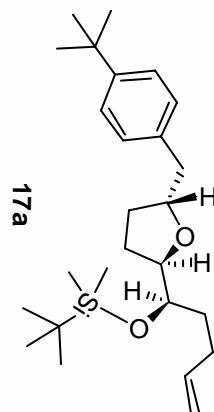

Std proton

File: aw1-168-HNMR

Pulse Sequence: s2pu1

Solvent: cdcl3

Ambient temperature

Operator: amanfran

File: aw1-168-HNMR

INOVA-400 "Kr.chem.1sa.umich.edu"

Relax. delay 0.500 sec

Pulse 45.0 degrees

Acq. time 3.000 sec

Width 6399.5 Hz

16 repetitions

OBSERVE H1, 399.9649645 MHz

DATA PROCESSING

Line broadening 0.2 Hz

FT size 65536

Total time 1 min, 3 sec

Acquisition date: Aug 12 2008

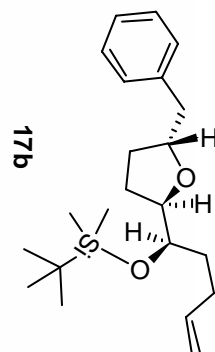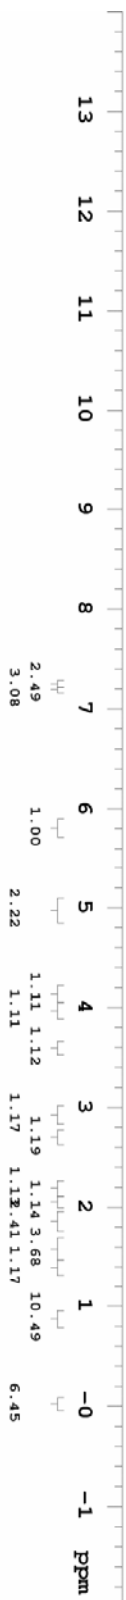

Std Carbon

File: aw1-137CNMR

Pulse Sequence: s2pul

Solvent: cdcl3  
 Temp: 30.0 C / 303.1 K  
 Operator: amanfran  
 File: aw1-137CNMR  
 INOVA-400 "Kz.chem.lsa.umich.edu"

Relax. delay 0.100 sec  
 Pulse 30.0 degrees  
 Acq. time 1.300 sec  
 Width 24140.0 Hz  
 192 repetitions  
 OBSERVE C13, 100.5712703 MHz  
 DECOUPLE H1, 399.9669644 MHz  
 Power 39 dB  
 continuously on  
 WALTZ-16 modulated  
 DATA PROCESSING  
 Line broadening 0.8 Hz  
 FT size 65536  
 Total time 4 min, 30 sec  
 Acquisition date: Jul 10 2008

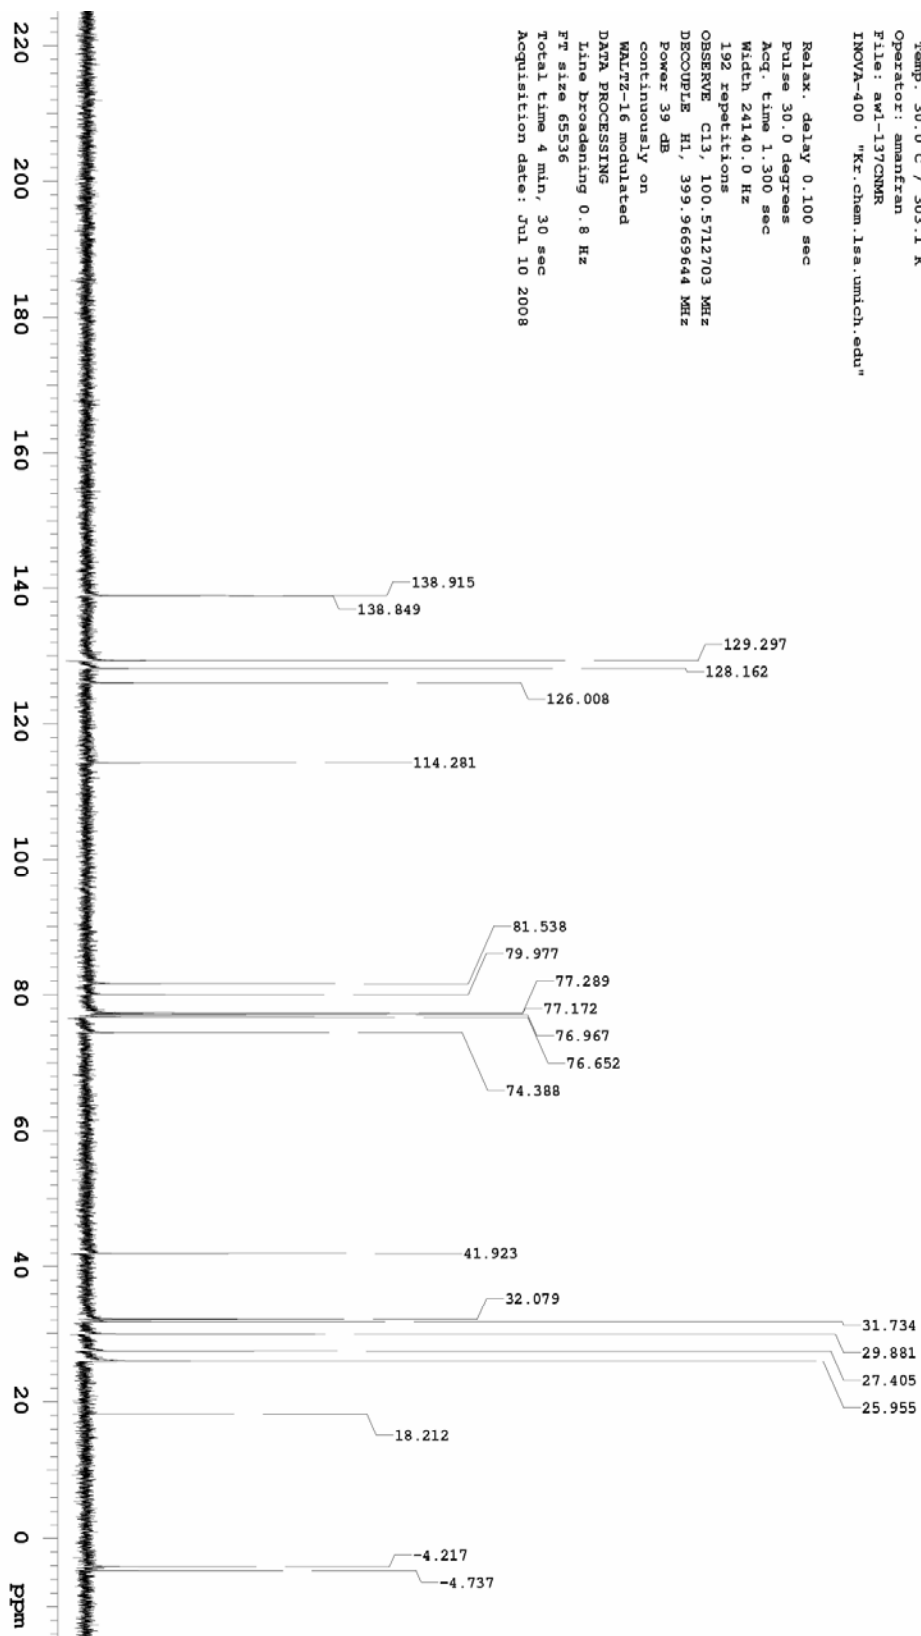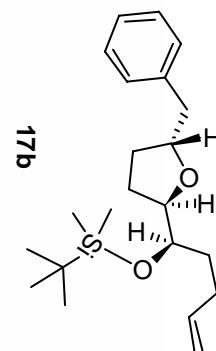

## STANDARD PROTON PARAMETERS

File: aw1-167-HNMR  
 Pulse Sequence: szpul  
 Solvent: cdcl3  
 Ambient temperature  
 Operator: amanfran  
 File: aw1-167-HNMR  
 VNMR5-401 "Kr.chem.1sa.umich.edu"

Relax. delay 1.000 sec  
 Pulse 45.0 degrees  
 Acq. time 2.556 sec  
 Width 6410.3 Hz  
 8 repetitions  
 OBSERVE H1, 400.5297790 MHz  
 DATA PROCESSING  
 FT size 32768  
 Total time 0 min, 35 sec  
 Acquisition date: Sep 5 2008

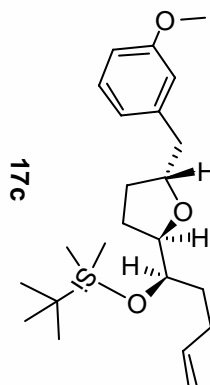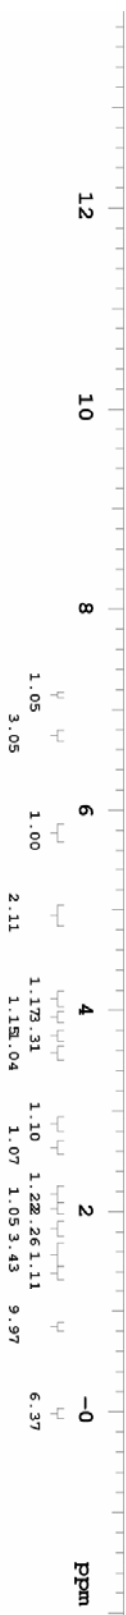

## STANDARD PROTON PARAMETERS

File: sw1-167-CNMR  
 Pulse Sequence: szpul  
 Solvent: cdcl3  
 Ambient Temperature  
 Operator: amanfran  
 File: sw1-167-CNMR  
 VNMR5-401 "K.chem.1sa.umich.edu"

Relax. delay 1.000 sec  
 Pulse 45.0 degrees  
 Acq. time 1.285 sec  
 Width 25510.2 Hz  
 64 repetitions  
 OBSERVE C13, 100.7132880 MHz  
 DECOUPLE H1, 400.5317616 MHz  
 Power 40 dB  
 continuously on  
 WALTZ-16 modulated  
 DATA PROCESSING  
 Line Broadening 0.5 Hz  
 F2 size 65536  
 Total time 2 min, 26 sec  
 Acquisition date: Sep 5 2008

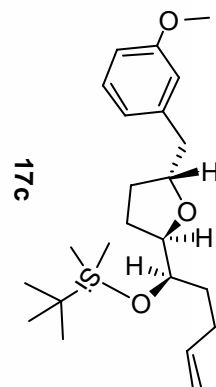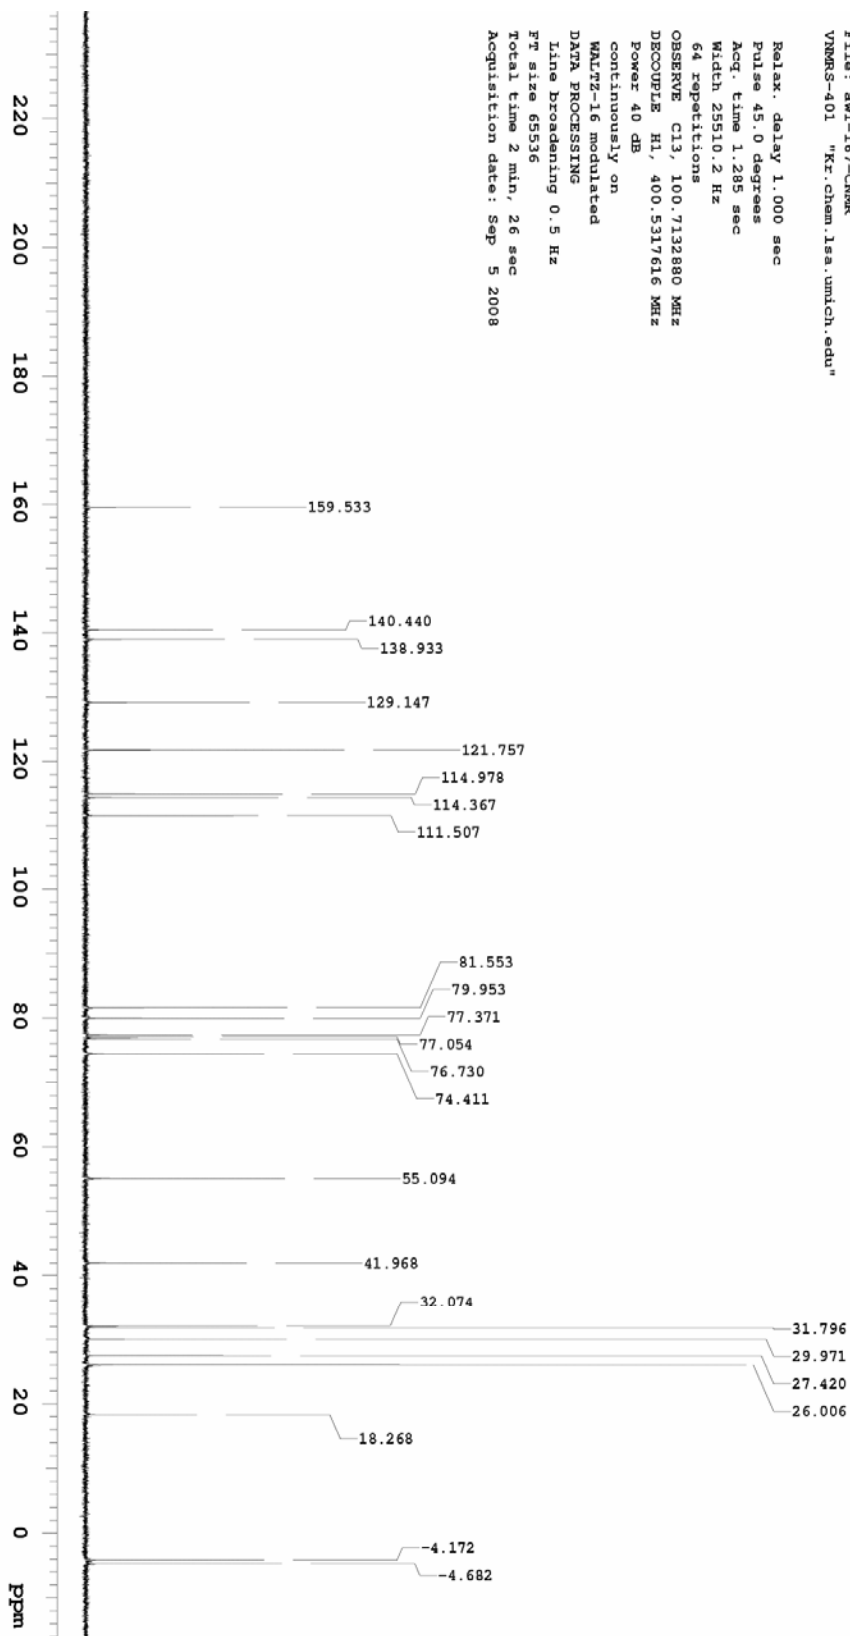

Std proton

File: aw1-195-HNMR  
Pulse Sequence: s2pul  
Solvent: cdcl3  
Temp: 25.0 C / 298.1 K  
Operator: amanfran  
File: aw1-195-HNMR  
INOVA-400 "Kr.chem.lsa.umich.edu"

Relax. delay 0.500 sec  
Pulse 45.0 degrees  
Acq. time 3.000 sec  
Width 6399.5 Hz  
16 repetitions  
OBSERVE H1, 399.9649645 MHz  
DATA PROCESSING  
Line broadening 0.2 Hz  
FT size 65536  
Total time 0 min, 10 sec  
Acquisition date: Sep 17 2008

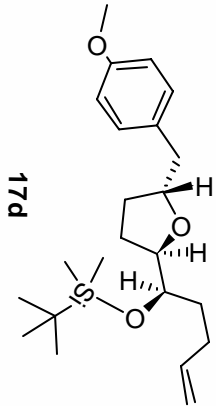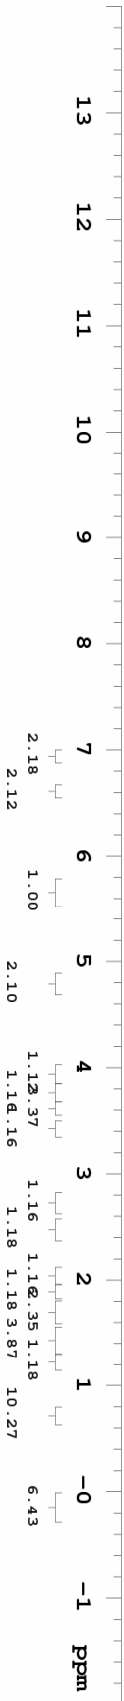



Std Carbon

File: aw1-195-CNMR

Pulse Sequence: s2pul

Solvent: cdcl3

Ambient temperature

Operator: amanfran

File: aw1-195-CNMR

INOVA-400 "Kr.chem.lsa.umich.edu"

Relax. delay 0.100 sec

Pulse 30.0 degrees

Acq. time 1.300 sec

Width 24140.0 Hz

112 repetitions

OBSERVE C13, 100.5712703 MHz

DECOUPLE H1, 399.9669644 MHz

Power 39 dB

continuously on

WALTZ-16 modulated

DATA PROCESSING

Line broadening 0.8 Hz

FT size 65536

Total time 2 min, 37 sec

Acquisition date: Sep 16 2008

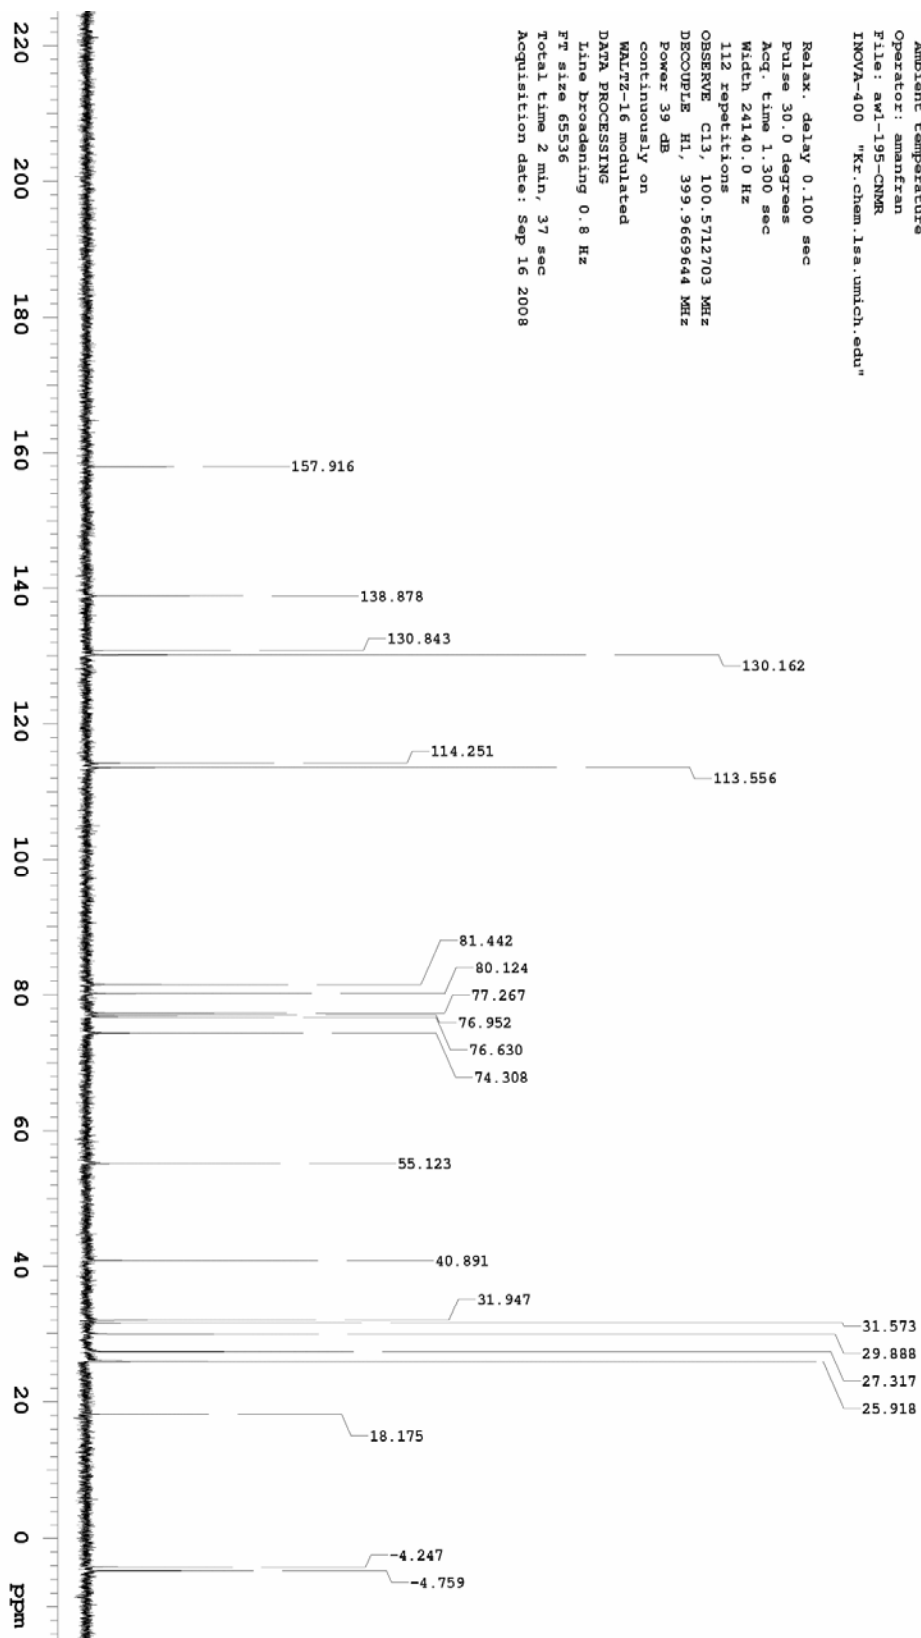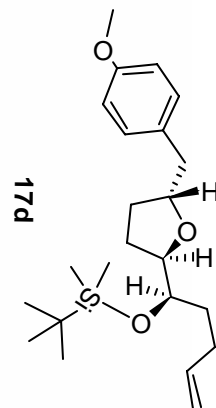

## STANDARD PROTON PARAMETERS

File: aw2-2-2-HMR

Pulse Sequence: szpul

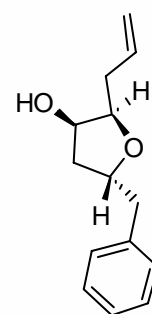

16a

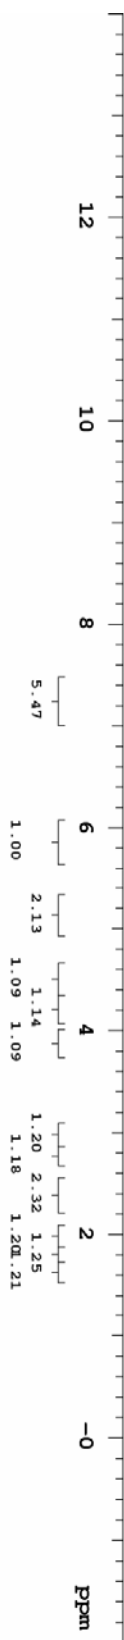

## STANDARD PROTON PARAMETERS

File: sw2-2-2-CNMR  
 Pulse Sequence: szpul  
 Solvent: cdcl3  
 Temp: 25.0 C / 298.1 K  
 Operator: amantran  
 File: sw2-2-2-CNMR  
 VNMR-401 "K.chem.lsa.umich.edu"

Relax. delay 1.000 sec  
 Pulse 45.0 degrees  
 Acq. time 1.285 sec  
 Width 25510.2 Hz  
 64 repetitions  
 OBSERVE C13, 100.7132880 MHz  
 DECOUPLE H1, 400.5317616 MHz  
 Power 40 dB  
 continuously on  
 WALTZ-16 modulated  
 DATA PROCESSING  
 Line Broadening 0.5 Hz  
 F2 size 65536  
 Total time 2 min, 26 sec  
 Acquisition date: Oct 6 2008

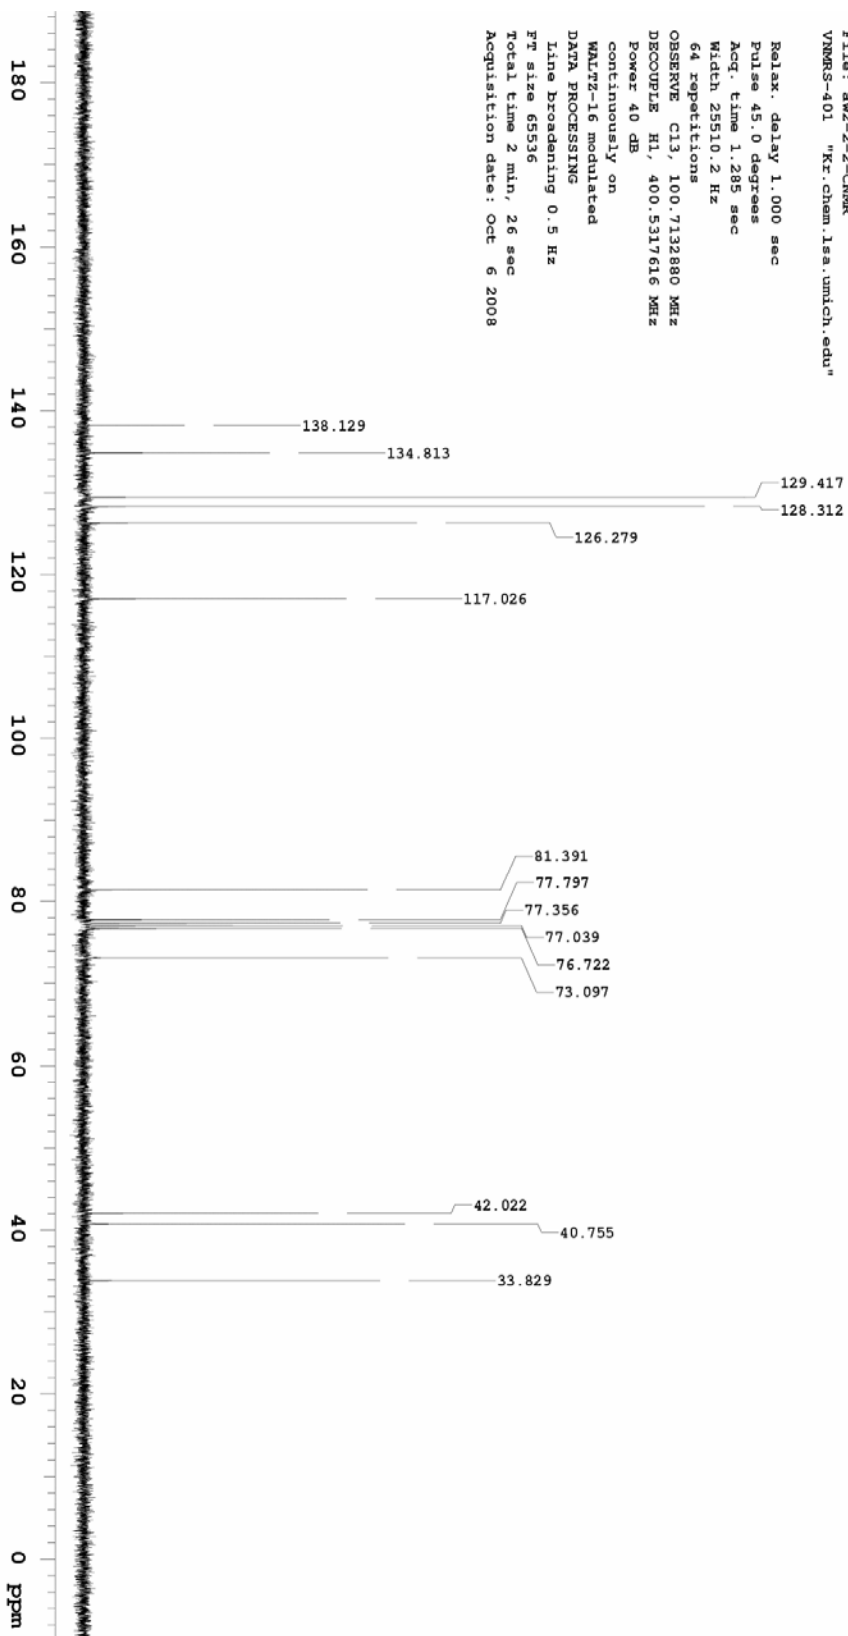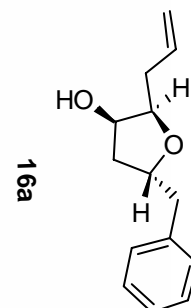

STANDARD PROTON PARAMETERS

File: aw2-5-2  
 Pulse Sequence: s2pul  
 Solvent: cdcl3  
 Temp: 25.0 C / 298.1 K  
 Operator: amantran  
 File: aw2-5-2  
 VNMR-400 "Kr.chem.lsa.umich.edu"  
 Relax. delay 1.000 sec  
 Pulse 45.0 degrees  
 Acq. time 2.556 sec  
 Width 6410.3 Hz  
 8 repetitions  
 OBSERVE H1, 399.5389259 MHz  
 DATA PROCESSING  
 FT size 32768  
 Total time 0 min, 35 sec  
 Acquisition date: Oct 6 2008

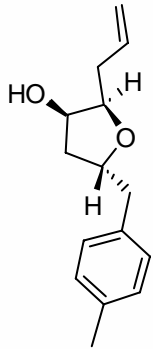

16b

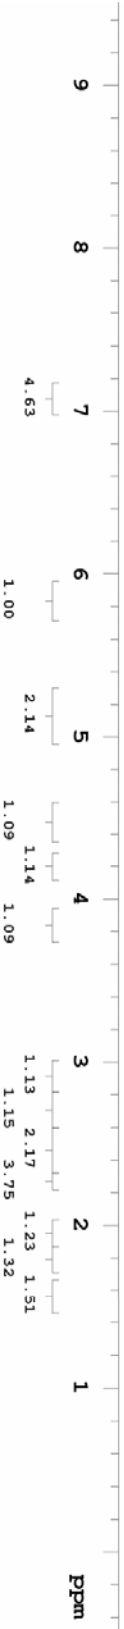

Std Carbon

File: aw1-123CNMR

Pulse Sequence: s2pul

Solvent: cdcl3  
 Temp: 25.0 C / 298.1 K  
 Operator: amanfran  
 File: aw1-123CNMR  
 INOVA-400 "K.chem.lsa.umich.edu"

Relax. delay 0.100 sec  
 Pulse 30.0 degrees  
 Acq. time 1.300 sec  
 Width 24140.0 Hz  
 192 repetitions  
 OBSERVE C13, 100.5712703 MHz  
 DECOUPLE H1, 399.9669644 MHz  
 Power 39 dB  
 continuously on  
 WALTZ-16 modulated  
 DATA PROCESSING  
 Line broadening 0.8 Hz  
 FT size 65536  
 Total time 4 min, 30 sec  
 Acquisition date: Jun 30 2008

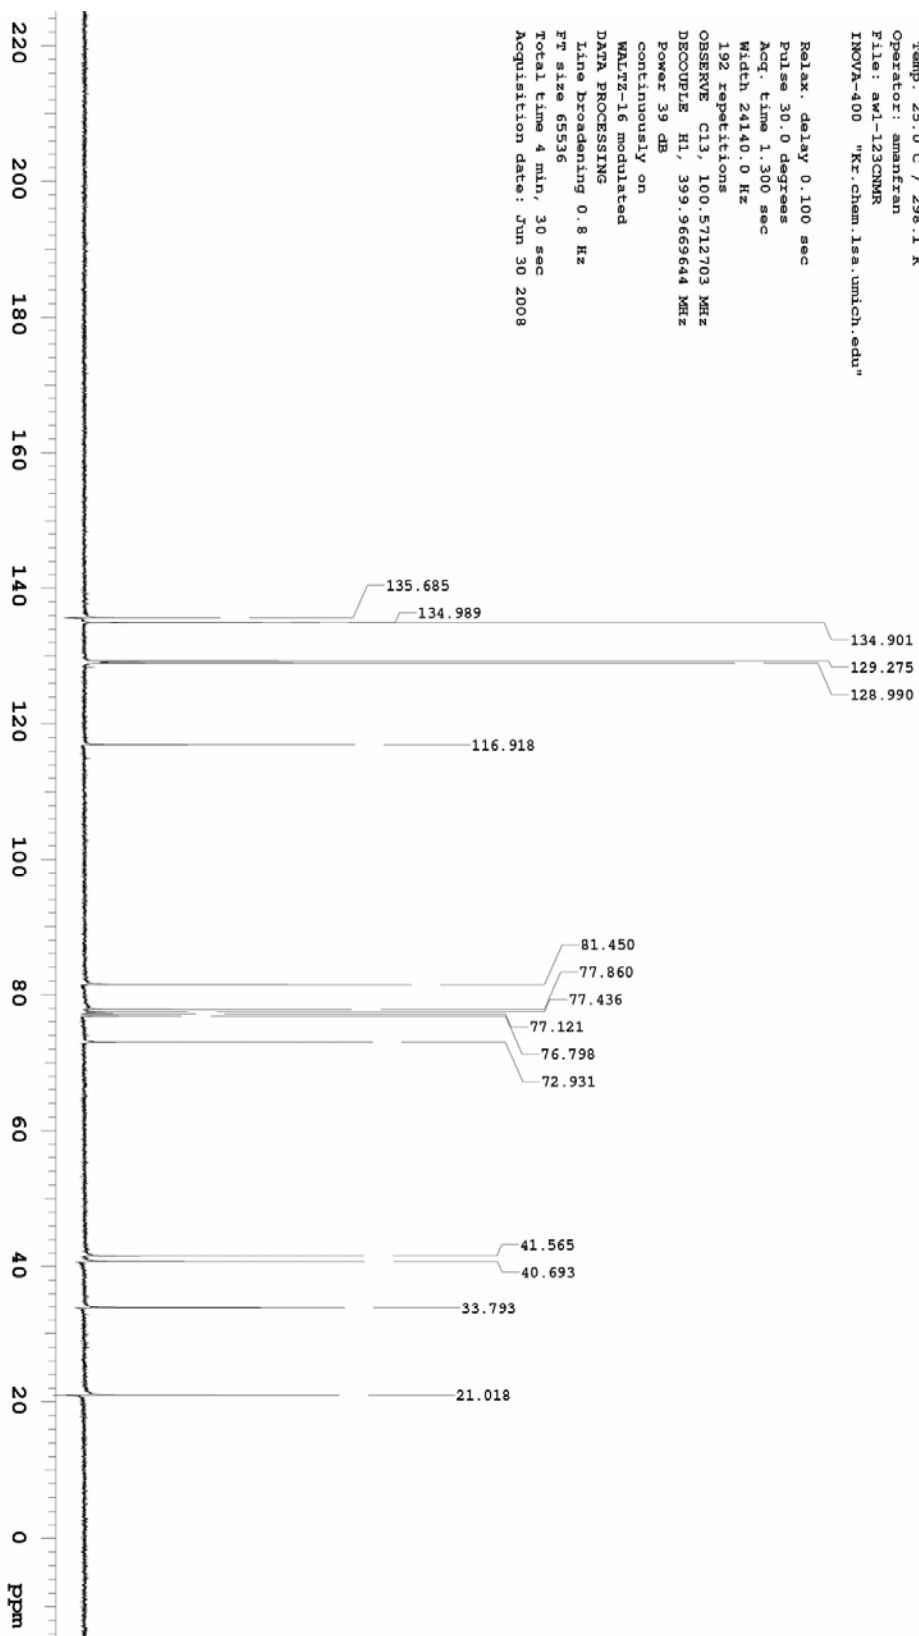

16b

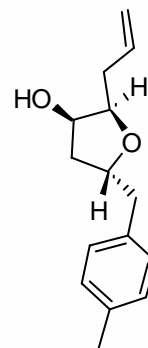

## STANDARD PROTON PARAMETERS

File: aw1-157  
 Pulse Sequence: szpul  
 Solvent: cdcl3  
 Temp: 25.0 C / 298.1 K  
 Operator: amanfran  
 File: aw1-157  
 VNMR-400 "K.chem.lsa.umich.edu"

Relax. delay 1.000 sec  
 Pulse 45.0 degrees  
 Acq. time 2.556 sec  
 Width 6410.3 Hz  
 8 repetitions  
 OBSERVE H1, 399.5389259 MHz  
 DATA PROCESSING  
 FT size 32768  
 Total time 0 min, 35 sec  
 Acquisition date: Jul 24 2008

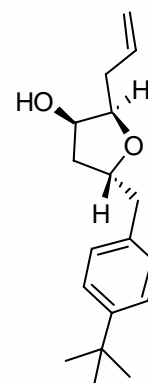

16c

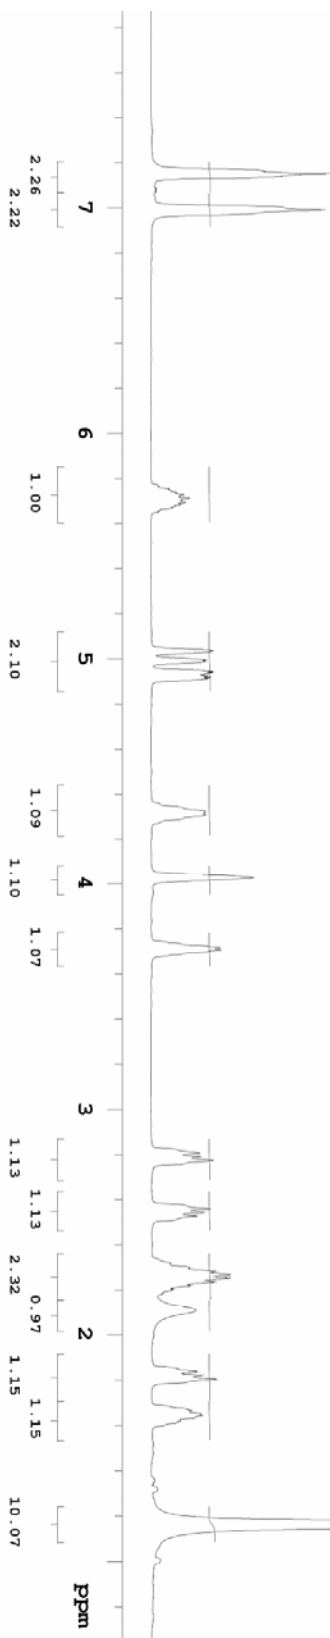

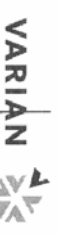

STANDARD PROTON PARAMETERS

Sample Name:

Data Collected on:  
Co.Chem., LSA,UMich.Edu-vnmrs400  
Archive directory:

Sample directory:

Fidfile: mw1-157-qosy

Pulse Sequence: gpcsy

Solvent: cdcl3  
Data collected on: Aug 1 2008

Operator: amanfran

Relax. delay 1.000 sec

Acq. time 0.150 sec

Width 3188.8 Hz

2D Width 3188.8 Hz

2 repetitions

200 increments

OBSERVE H1, 400.5297589 MHz

DATA PROCESSING

Sq. sine bell 0.075-sec

F1 DATA PROCESSING

Sq. sine bell 0.083 sec

FT size 2048 x 2048

Total time 3 min 13 sec

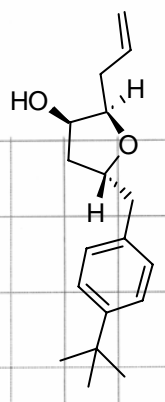

16c

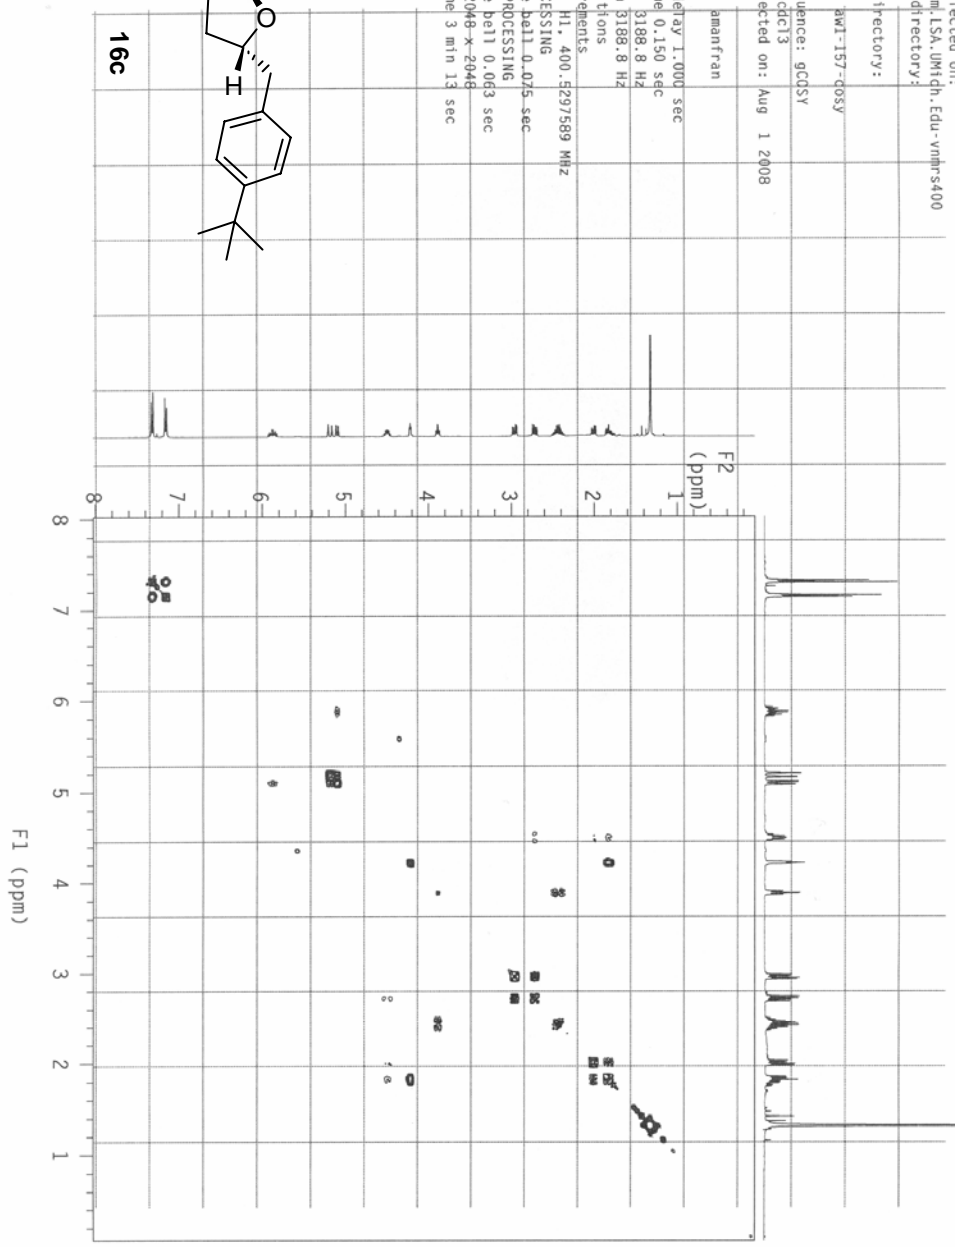

## STANDARD PROTON PARAMETERS

File: aw1-157-noesy

Pulse Sequence: NOESY

Solvent: cdcl3  
Ambient temperature  
Operator: amanfran  
File: aw1-157-noesy  
VNMRS-401 "Kr.chem.1sa.umich.edu"

Relax. delay 1.000 sec  
Acq. time 0.150 sec  
Width 6410.3 Hz  
20 Width 6410.3 Hz  
4 repetitions  
2 x 128 increments  
OBSERVE H1, 400.5297589 MHz  
DATA PROCESSING  
Gauss apodization 0.059 sec  
F1 DATA PROCESSING  
Gauss apodization 0.018 sec  
FT size 2048 x 2048  
Total time 20 min, 43 sec  
Acquisition date: Aug 1 2008

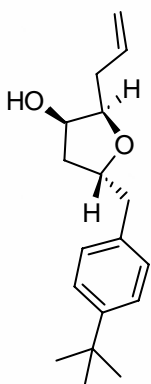**16c**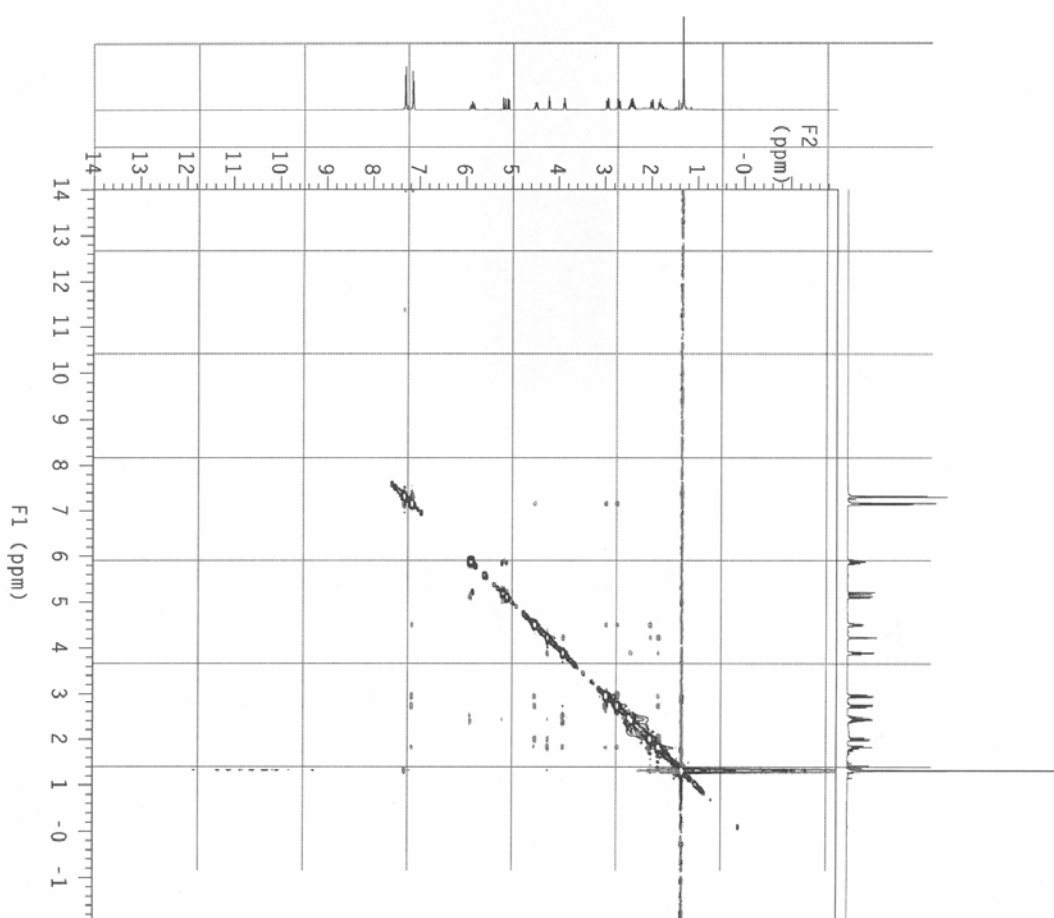



## STANDARD PROTON PARAMETERS

File: aw1-157CNMR

Pulse Sequence: s2pul

Solvent: cdcl3

Temp: 25.0 C / 298.1 K

Operator: amantran

File: aw1-157CNMR

VNMRB-400 "K:chem.lsa.umich.edu"

Relax. delay 1.000 sec

Pulse 45.0 degrees

Acq. time 1.285 sec

Width 25510.2 Hz

80 repetitions

OBSERVE C13, 100.4641428 MHz

DECOUPLE H1, 399.5409236 MHz

Power 33 dB

continuously on

WALTZ-16 modulated

DATA PROCESSING

Line broadening 0.5 Hz

FT size 65536

Total time 3 min, 3 sec

Acquisition date: Jul 24 2008

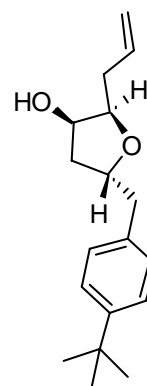

16c

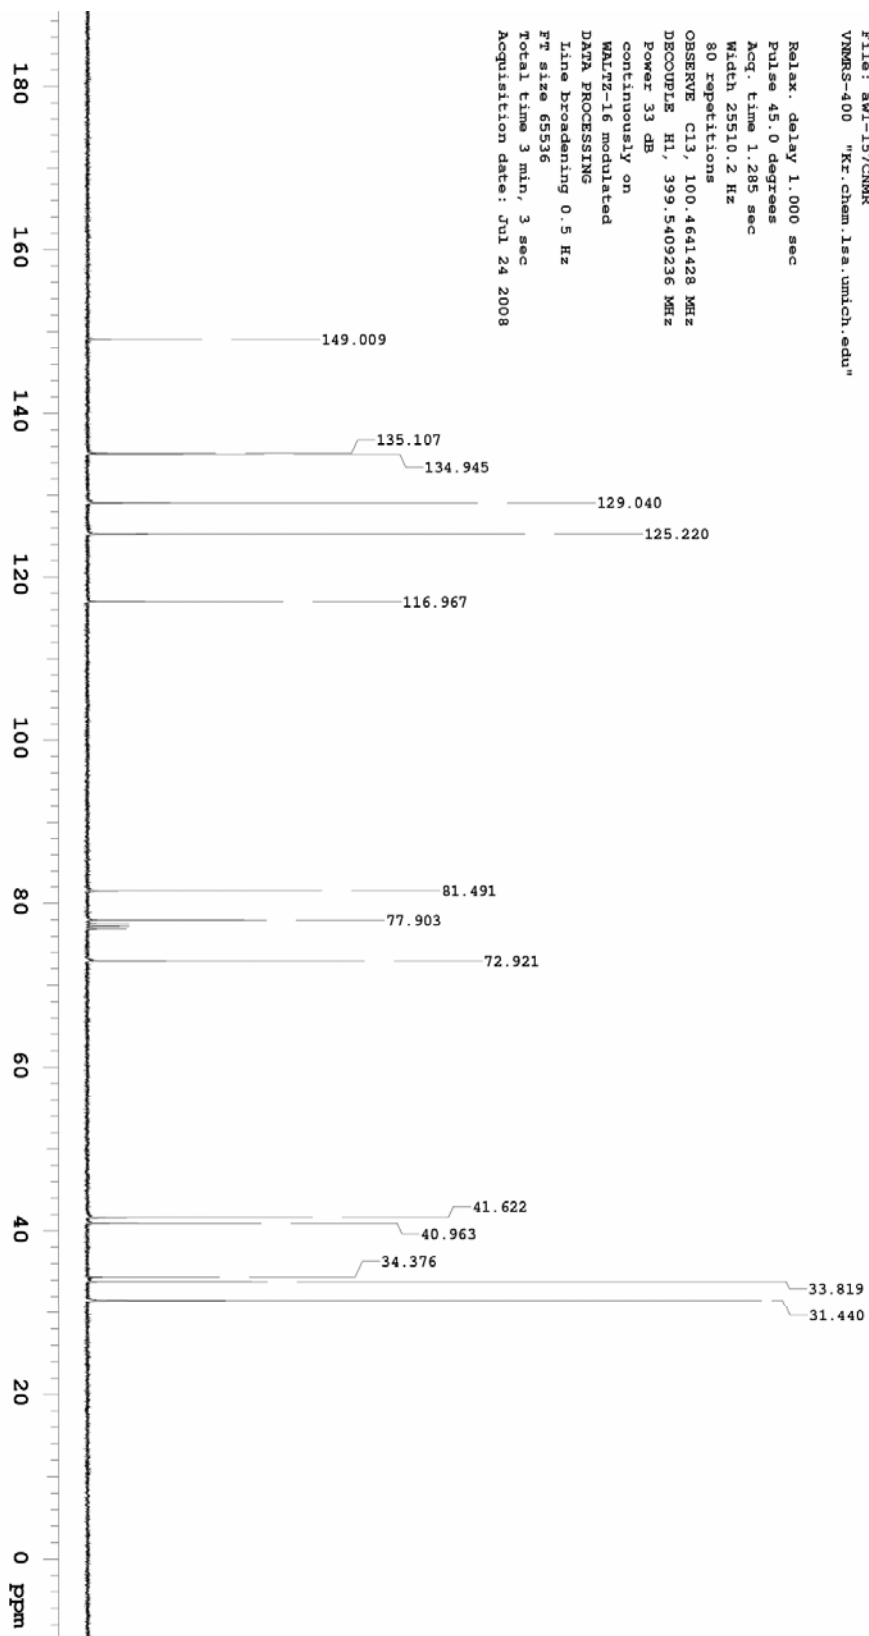

STANDARD PROTON PARAMETERS

File: aw2-2-1-HNMR

Pulse Sequence: szpul

Solvent: cdcl3

Ambient temperature

Operator: amanfran

File: aw2-2-1-HNMR

VNMR5-401 "Kr.Chem.1sa.umich.edu"

Relax. delay 1.000 sec

Pulse 45.0 degrees

Acq. time 2.556 sec

Width 6410.3 Hz

8 repetitions

OBSERVE H1, 400.5297589 MHz

DATA PROCESSING

FT size 32768

Total time 0 min, 35 sec

Acquisition date: Oct 6 2008

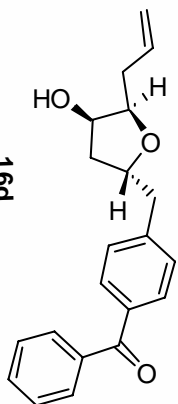

16d

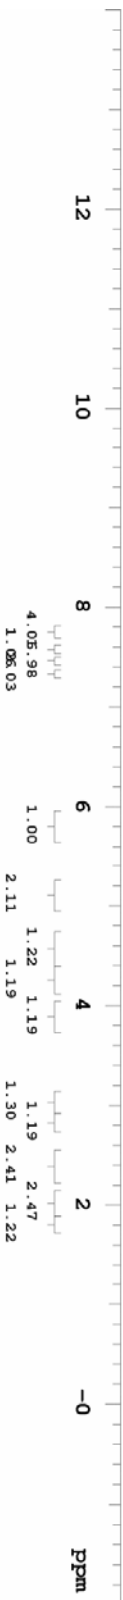

## STANDARD PROTON PARAMETERS

File: sw2-2-1-CNMR  
 Pulse Sequence: szpul  
 Solvent: cdcl3  
 Ambient Temperature  
 Operator: amanfran  
 File: sw2-2-1-CNMR  
 VNMR-401 "K.chem.lsa.umich.edu"

Relax. delay 1.000 sec  
 Pulse 45.0 degrees  
 Acq. time 1.285 sec  
 Width 25510.2 Hz  
 32 repetitions  
 OBSERVE C13, 100.7132880 MHz  
 DECOUPLE H1, 400.5317616 MHz  
 Power 40 dB  
 continuously on  
 WALTZ-16 modulated  
 DATA PROCESSING  
 Line Broadening 0.5 Hz  
 F2 size 65536  
 Total time 1 min, 13 sec  
 Acquisition date: Oct 6 2008

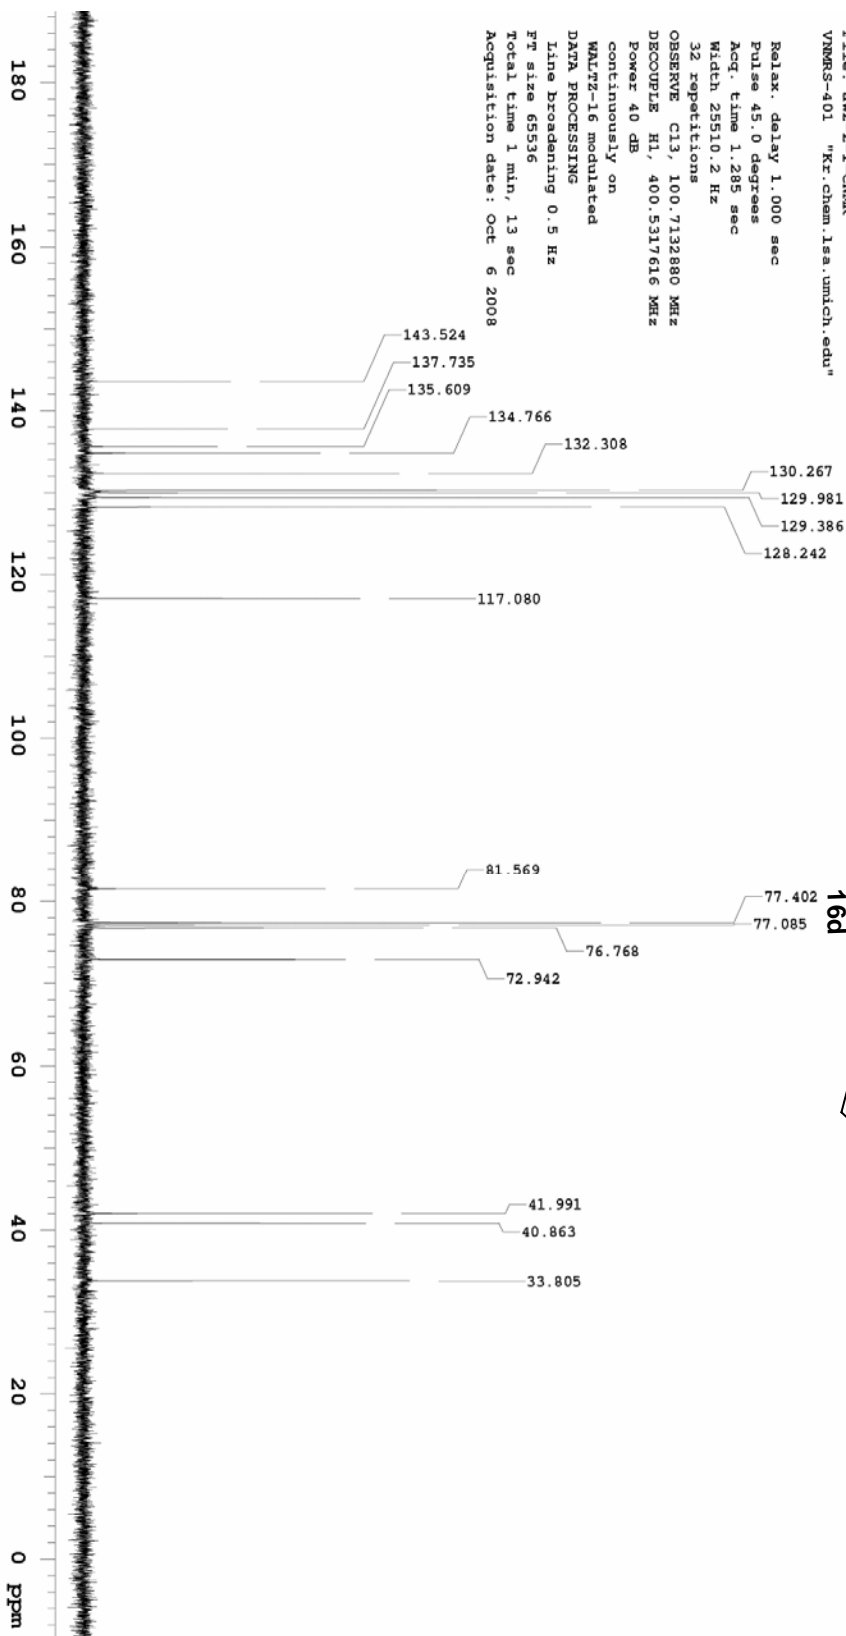

STANDARD PROTON PARAMETERS

File: sw1-138  
 Pulse Sequence: s2pul  
 Solvent: CDCl3  
 Ambient temperature  
 Operator: amantran  
 File: sw1-138  
 VNMR5-401 "Kr.chem.1sa.umich.edu"

Relax. delay 1.000 sec  
 Pulse 45.0 degrees  
 Acq. time 2.556 sec  
 Width 6410.3 Hz  
 8 repetitions  
 OBSERVE H1, 400.5297589 MHz  
 DATA PROCESSING  
 F1 size 32768  
 Total time 0 min, 35 sec  
 Acquisition date: Jul 10 2008

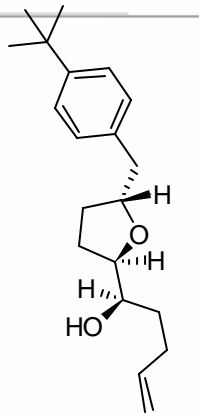

18a

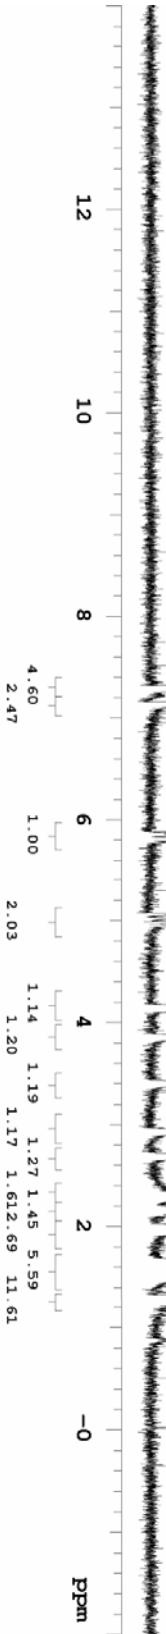

Std Carbon

File: aw1-138CNMR

Pulse Sequence: s2pul

Solvent: cdcl3

Ambient temperature

Operator: amanfran

File: aw1-138CNMR

INOVA-400 "Kr.chem.lsa.umich.edu"

Relax. delay 0.100 sec

Pulse 30.0 degrees

Acq. time 1.300 sec

Width 24140.0 Hz

368 repetitions

OBSERVE C13, 100.5712703 MHz

DECOUPLE H1, 399.9669644 MHz

Power 39 dB

continuously on

WALTZ-16 modulated

DATA PROCESSING

Line broadening 0.8 Hz

FT size 65536

Total time 8 min, 38 sec

Acquisition date: Jul 10 2008

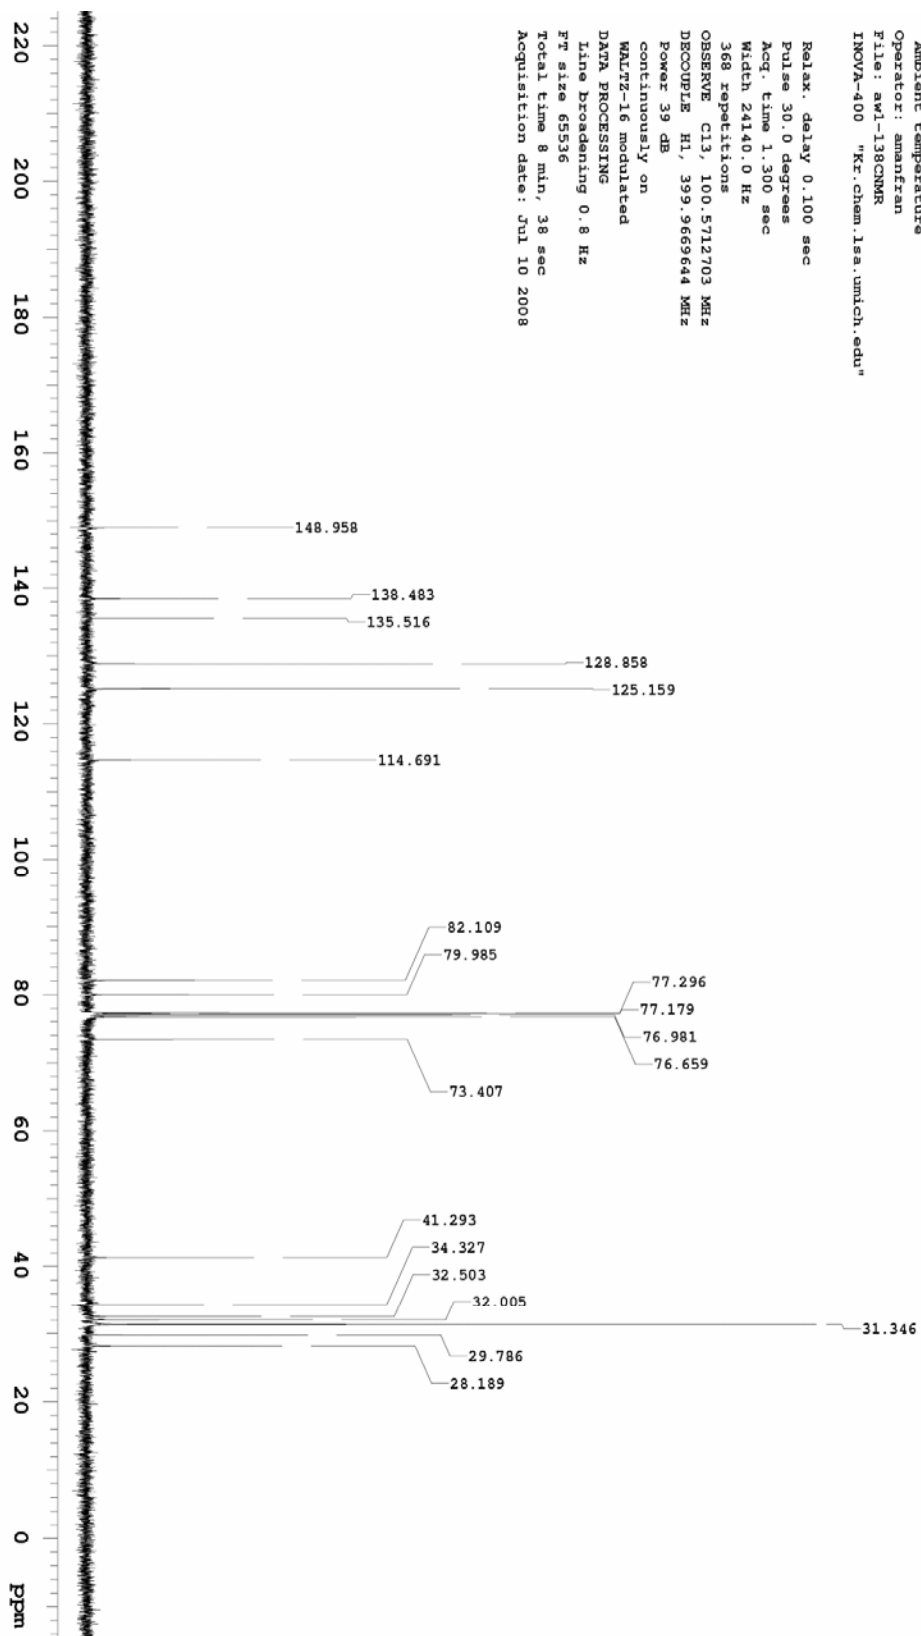

18a

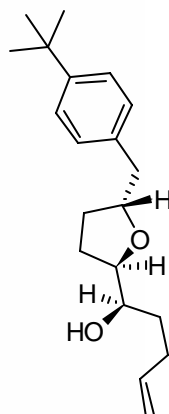

## STANDARD PROTON PARAMETERS

File: aw1-140HMR-coil2  
 Pulse Sequence: s2pul  
 Solvent: cdcl3  
 Temp: 22.0 C / 295.1 K  
 Operator: amantran  
 File: aw1-140HMR-coil2  
 YNMR5-400 "Kr.chem.lsa.umich.edu"

Relax. delay 1.000 sec  
 Pulse 45.0 degrees  
 Acq. time 2.556 sec  
 Width 6410.3 Hz  
 8 repetitions  
 OBSERVE H1, 399.5389259 MHz  
 DATA PROCESSING  
 FT size 32768  
 Total time 0 min, 35 sec  
 Acquisition date: Jul 14 2008

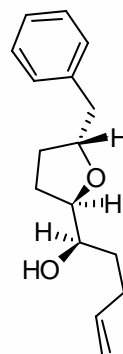

18b

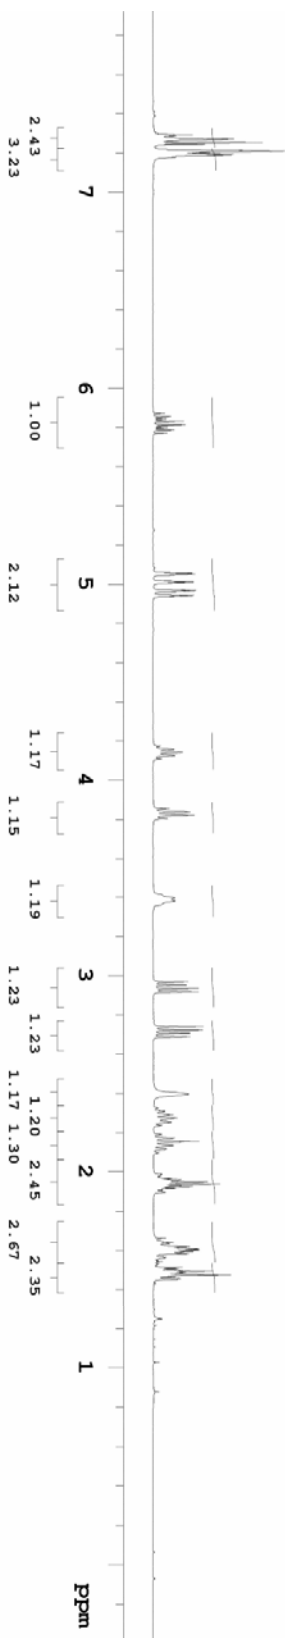

## STANDARD PROTON PARAMETERS

File: aw1-140CNMR  
 Pulse Sequence: s2pul  
 Solvent: cdcl3  
 Temp: 22.0 C / 295.1 K  
 Operator: amantran  
 File: aw1-140CNMR  
 YNMR5-400 "Kr.chem.lsa.umich.edu"

Relax. delay 1.000 sec  
 Pulse 45.0 degrees  
 Acq. time 1.285 sec  
 Width 25510.2 Hz  
 64 repetitions  
 OBSERVE C13, 100.4641428 MHz  
 DECOUPLE H1, 399.5409236 MHz  
 Power 33 dB  
 continuously on  
 WALTZ-16 modulated  
 DATA PROCESSING  
 Line Broadening 0.5 Hz  
 FT size 65536  
 Total time 2 min, 26 sec  
 Acquisition date: Jul 11 2008

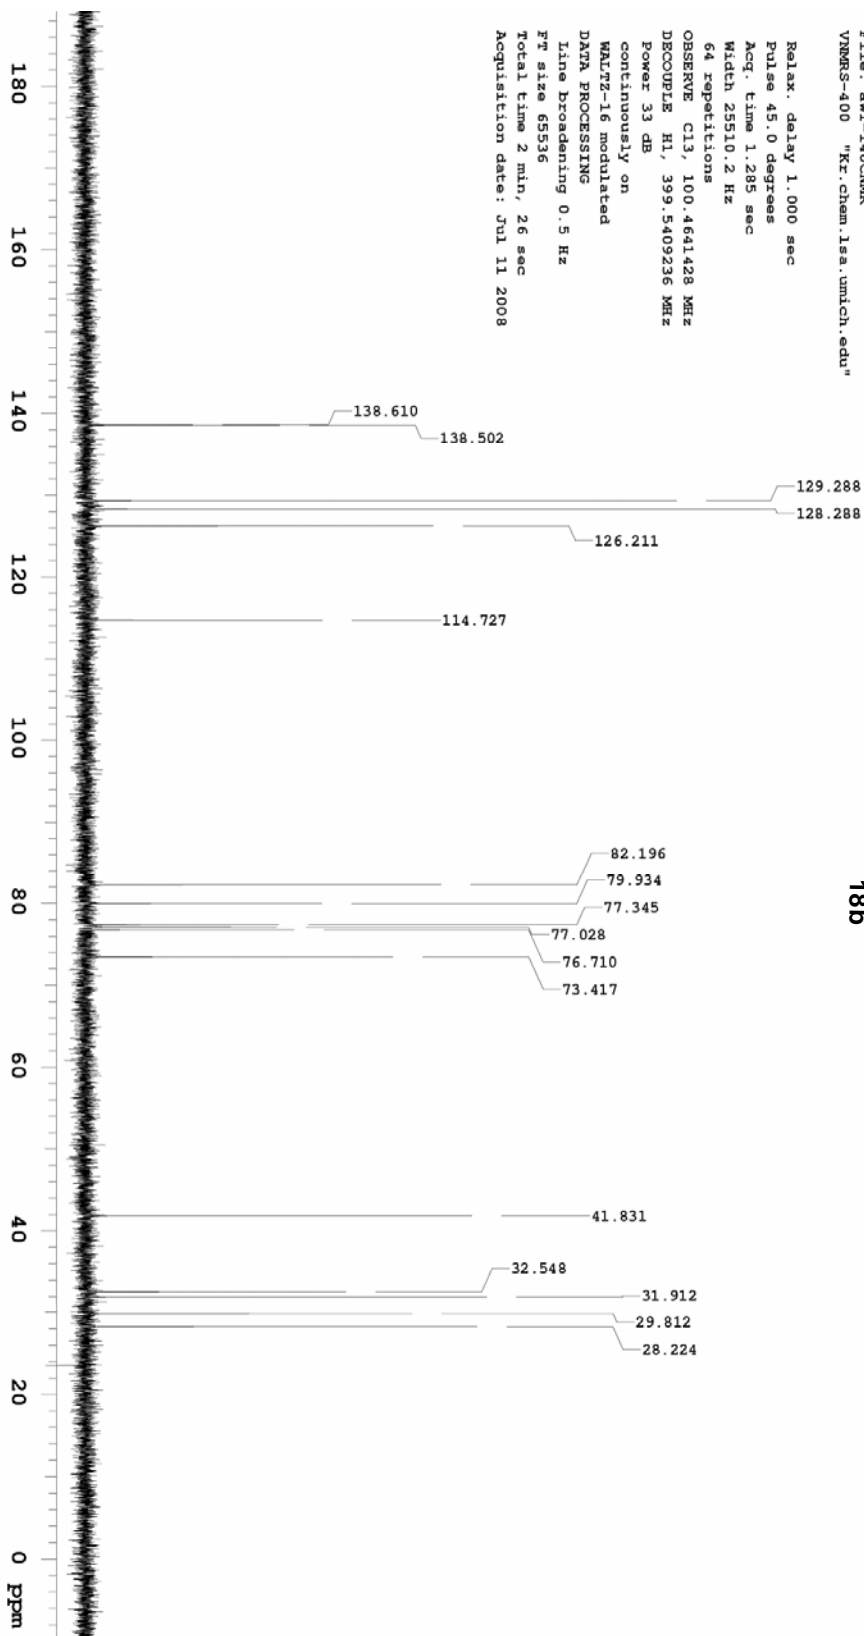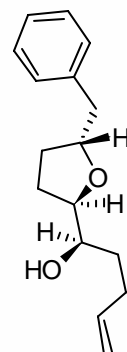

18b

## STANDARD PROTON PARAMETERS

File: aw1-190-HMR  
 Pulse Sequence: szpul  
 Solvent: cdcl3  
 Temp: 10.0 C / 283.1 K  
 Operator: amanfran  
 File: aw1-190-HMR  
 VNMR-401 "Kr.Chem.1sa.umich.edu"

Relax. delay 1.000 sec  
 Pulse 45.0 degrees  
 Acq. time 2.556 sec  
 Width 6410.3 Hz  
 32 repetitions  
 OBSERVE H1, 400.5297589 MHz  
 DATA PROCESSING  
 FT size 32768  
 Total time 2 min, 1 sec  
 Acquisition date: Sep 9 2008

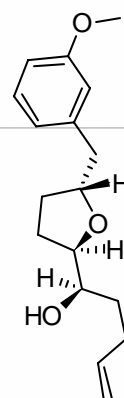

18c

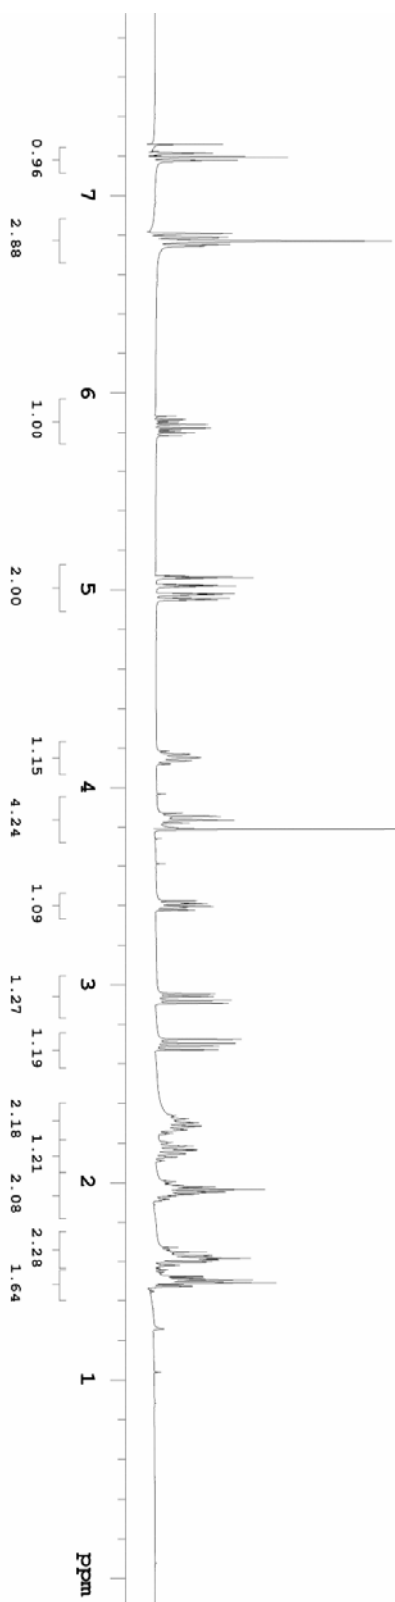



## STANDARD PROTON PARAMETERS

File: aw1-190-CNMR  
 Pulse Sequence: s2pul  
 Solvent: cdcl3  
 Temp: 10.0 C / 283.1 K  
 Operator: amantran  
 File: aw1-190-CNMR  
 YNMR5-401 "Kr.chem.lsa.umich.edu"

Relax. delay 1.000 sec  
 Pulse 45.0 degrees  
 Acq. time 1.285 sec  
 Width 25510.2 Hz  
 224 repetitions  
 OBSERVE C13, 100.7132880 MHz  
 DECOUPLE H1, 400.5317616 MHz  
 Power 40 dB  
 continuously on  
 WALTZ-16 modulated  
 DATA PROCESSING  
 Line broadening 0.5 Hz  
 FT size 65536  
 Total time 8 min, 33 sec  
 Acquisition date: Sep 9 2008

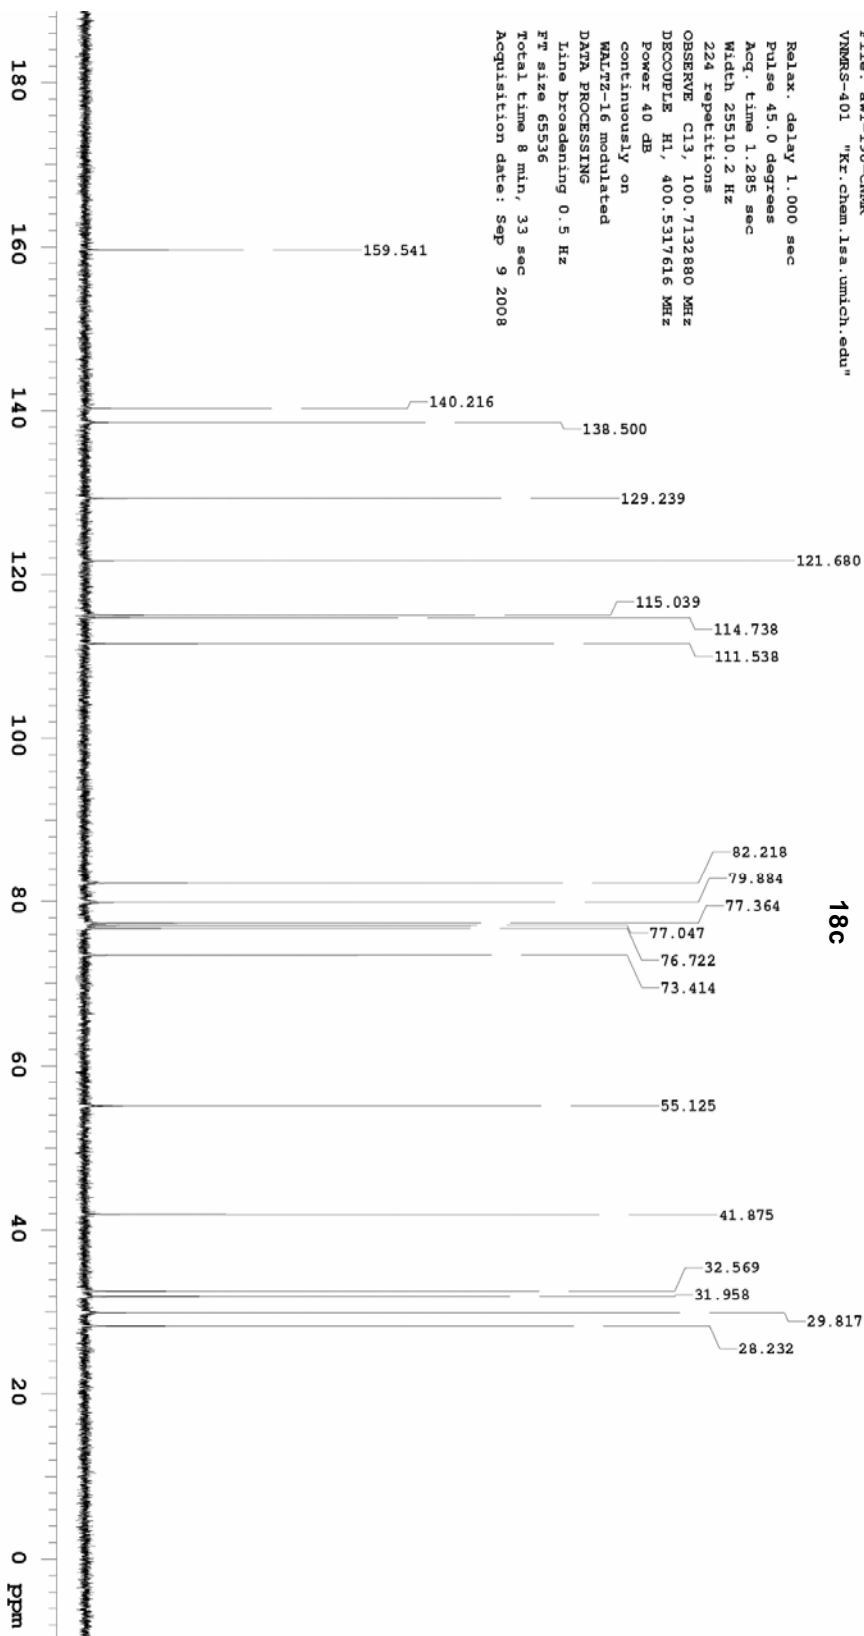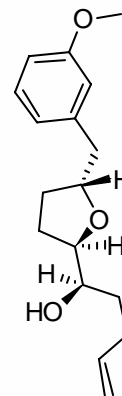

## STANDARD 1H OBSERVE - profile

File: aw1-199-HNMR

Pulse Sequence: s2pul

Solvent: cdcl3

Ambient temperature

Operator: amantran

File: aw1-199-HNMR

VNMR-400 "Kr.chem.lsa.umich.edu"

Relax. delay 1.000 sec

Pulse 45.0 degrees

Acq. time 2.556 sec

Width 6410.3 Hz

8 repetitions

OBSERVE H1, 399.5389259 MHz

DATA PROCESSING

Ft size 32768

Total time 0 min, 35 sec

Acquisition date: Sep 18 2008

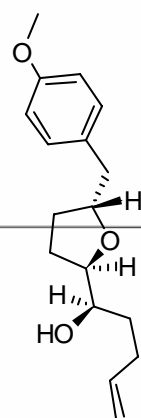

18d

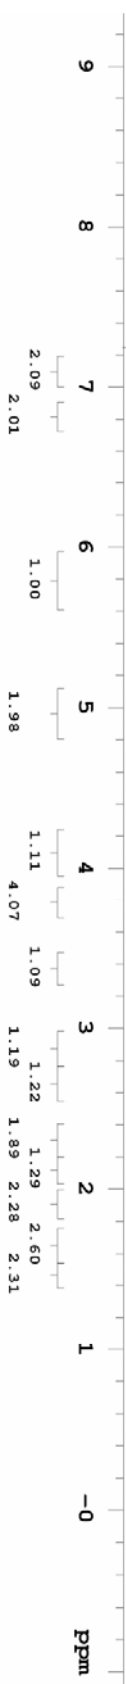

Std Carbon

File: aw1-199-CNMR

Pulse Sequence: s2pul

Solvent: cdcl3

Temp: 25.0 C / 298.1 K

Operator: amanfran

File: aw1-199-CNMR

INOVA-400 "Kr.chem.lsa.umich.edu"

Relax. delay 0.100 sec

Pulse 30.0 degrees

Acq. time 1.300 sec

Width 24140.0 Hz

144 repetitions

OBSERVE C13, 100.5712703 MHz

DECOUPLE H1, 399.9669644 MHz

Power 39 dB

continuously on

WALTZ-16 modulated

DATA PROCESSING

Line broadening 0.8 Hz

FT size 65536

Total time 3 min, 22 sec

Acquisition date: Sep 18 2008

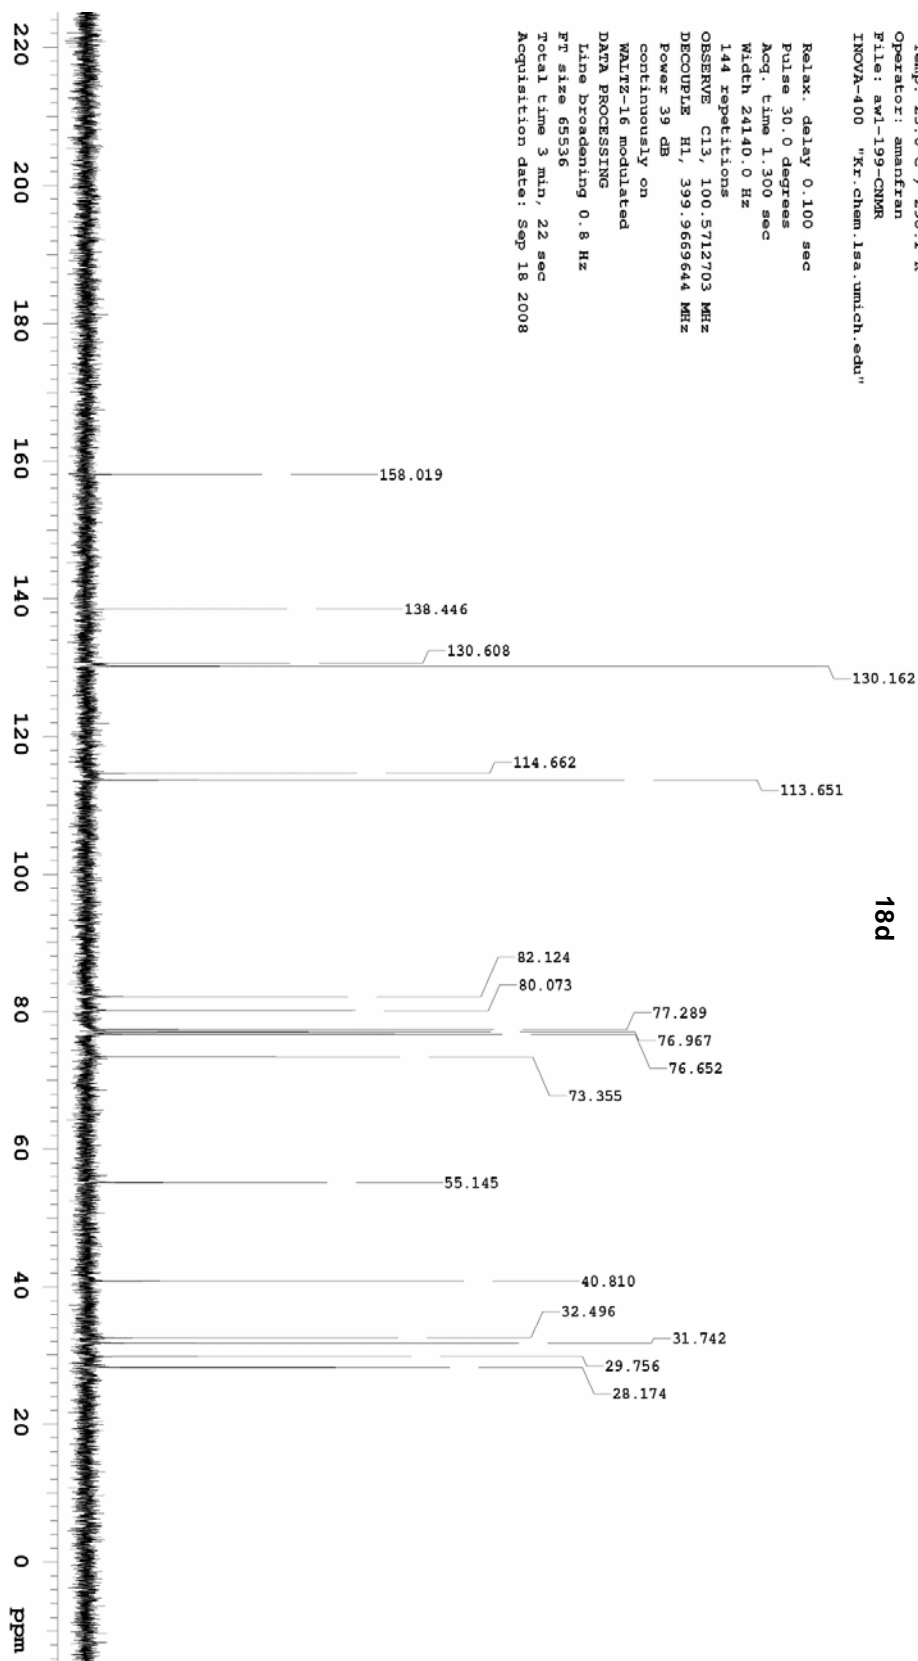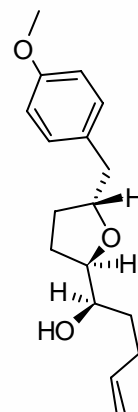

## STANDARD PROTON PARAMETERS

File: aw2-6-1-HMR  
Pulse Sequence: s2pul  
Solvent: toluene  
Ambient temperature  
Operator: amanfran  
File: aw2-6-1-HMR  
VNMR5-400 "Kr.chem.lsa.umich.edu"  
Relax. delay 1.000 sec  
Pulse 45.0 degrees  
Acq. time 2.556 sec  
Width 6410.3 Hz  
8 repetitions  
OBSERVE H1, 399.5389858 MHz  
DATA PROCESSING  
FT size 32768  
Focal time 0 min, 35 sec  
Acquisition date: Oct 11 2008

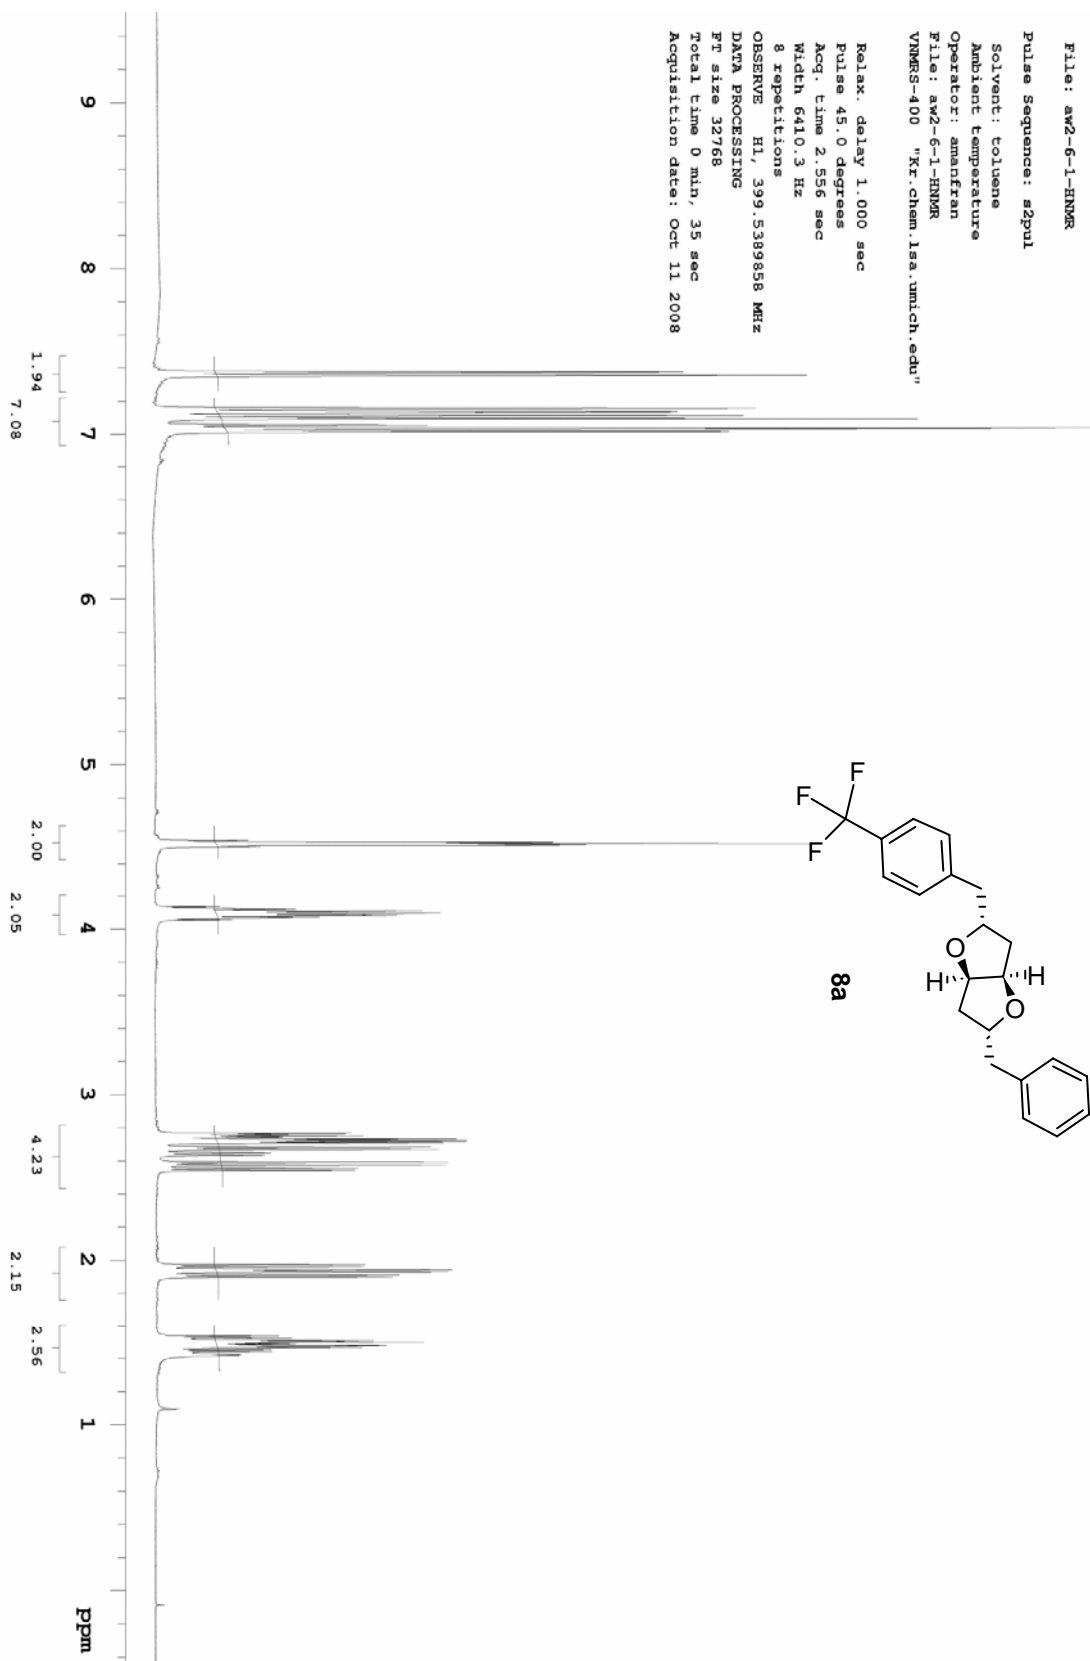

## STANDARD PROTON PARAMETERS

File: aw2-6-1-CNMR

Pulse Sequence: s2pul

Solvent: toluene

Ambient temperature

Operator: amantran

File: aw2-6-1-CNMR

VNMR-400 "Kr.chem.lsa.umich.edu"

Relax. delay 1.000 sec  
 Pulse 45.0 degrees  
 Acq. time 1.285 sec  
 Width 25510.2 Hz  
 256 repetitions  
 OBSERVE C13, 100.4641579 MHz  
 DECOUPLE H1, 399.5409835 MHz  
 Power 33 dB  
 continuously on  
 WALTZ-16 modulated  
 DATA PROCESSING  
 Line broadening 0.5 Hz  
 FT size 65536  
 Total time 9 min, 47 sec  
 Acquisition date: Oct 11 2008

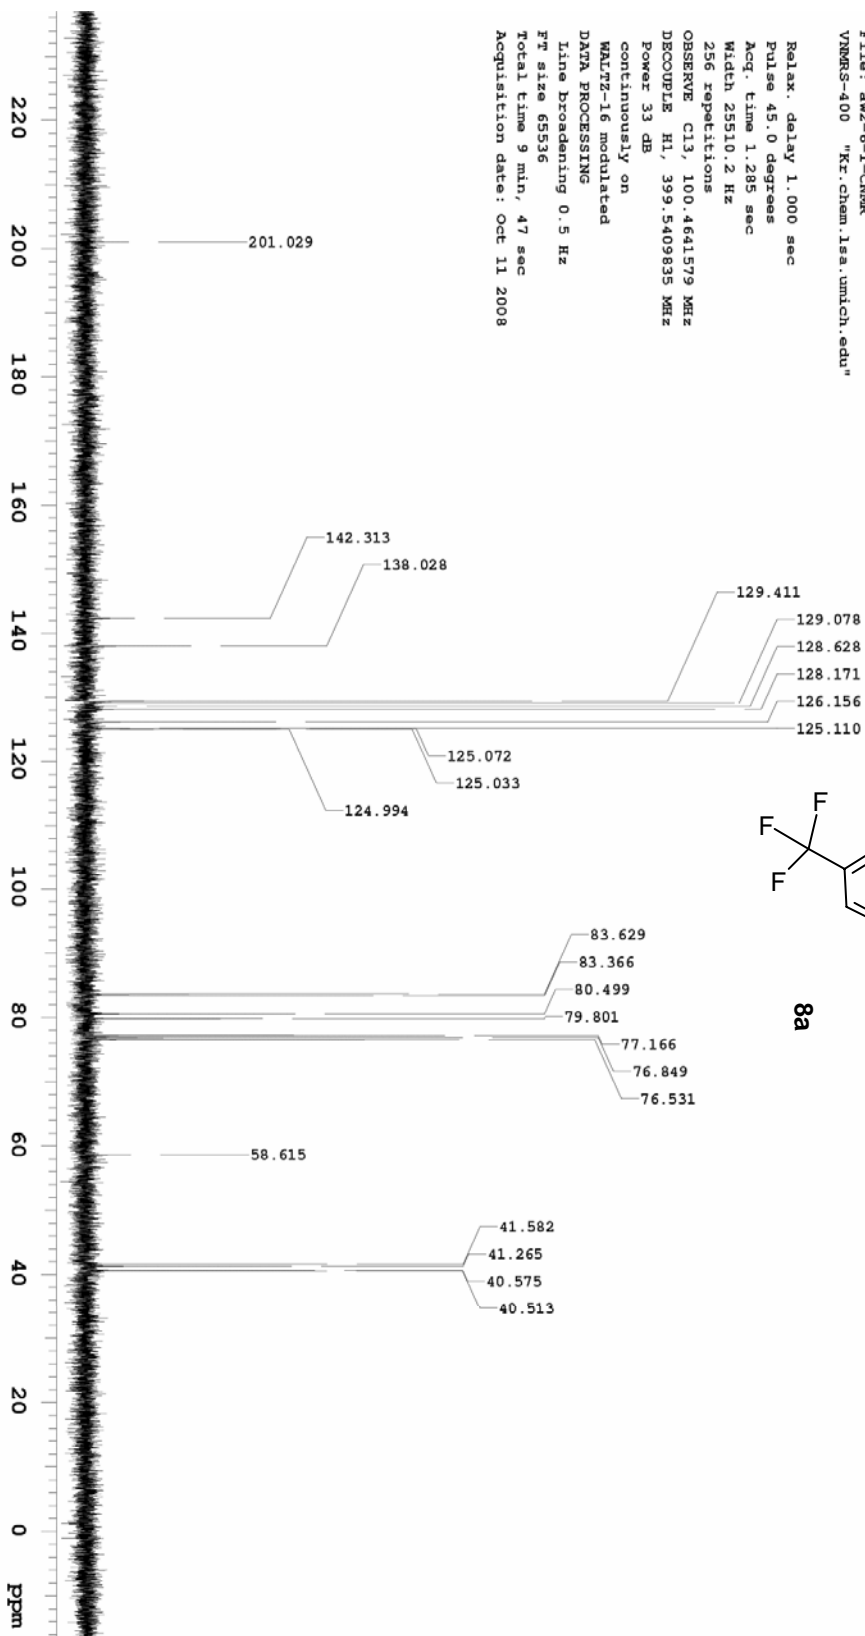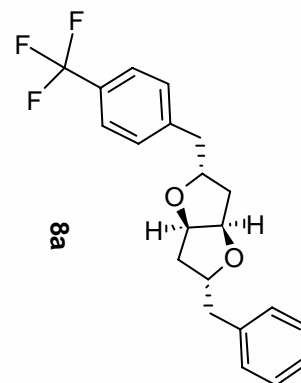

## STANDARD PROTON PARAMETERS

File: aw2-6-2-HNMR

Pulse Sequence: s2pul

Solvent: toluene

Ambient temperature

Operator: amantran

File: aw2-6-2-HNMR

VNMR-400 "Kr.chem.lsa.umich.edu"

Relax. delay 1.000 sec

Pulse 45.0 degrees

Acq. time 2.556 sec

Width 6410.3 Hz

8 repetitions

OBSERVE H1, 399.5389858 MHz

DATA PROCESSING

Ft size 32768

Total time 0 min, 35 sec

Acquisition date: Oct 11 2008

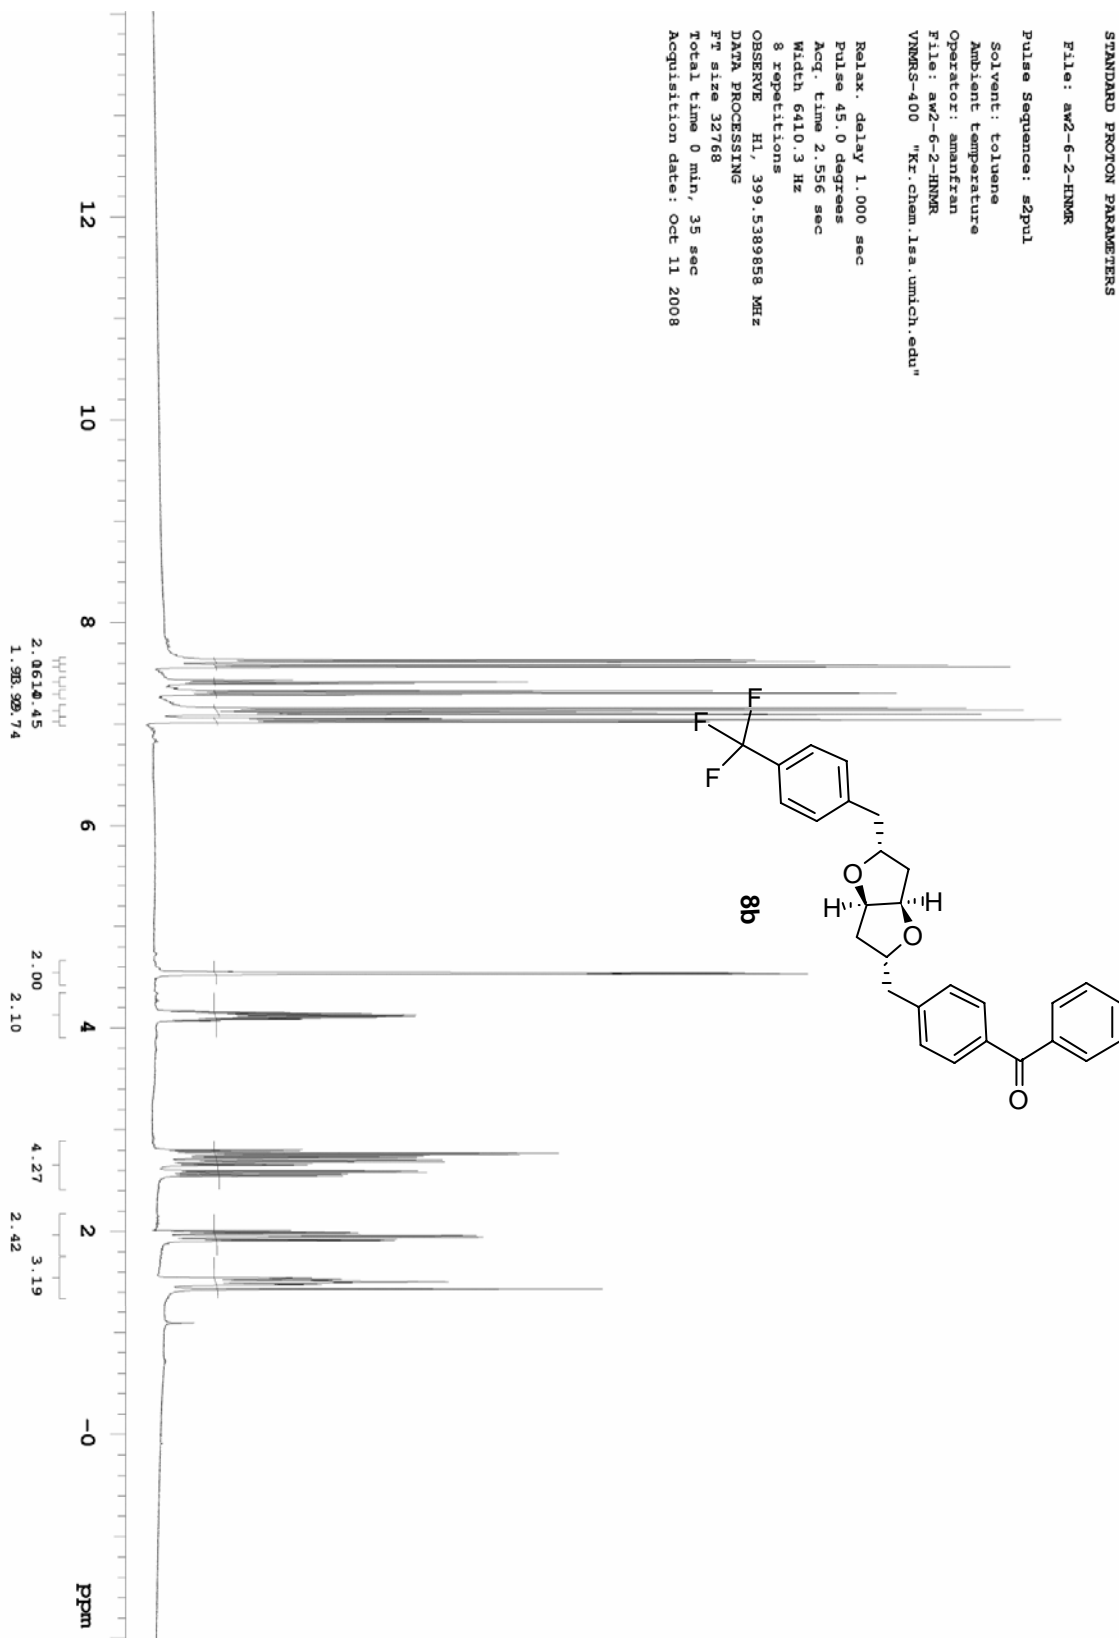

Std Carbon

File: aw2-6-2-CNMR

Pulse Sequence: s2pul

Solvent: cdcl3

Temp: 25.0 C / 298.1 K

Operator: amanfran

File: aw2-6-2-CNMR  
INOVA-400 "Kr.chem.lsa.umich.edu"

Relax. delay 0.100 sec

Pulse 30.0 degrees

Acq. time 1.300 sec

Width 24140.0 Hz

80 repetitions

OBSERVE C13, 100.5712703 MHz

DECOUPLE H1, 399.9669644 MHz

Power 39 dB

continuously on

WALTZ-16 modulated

DATA PROCESSING

Line broadening 0.8 Hz

F2 size 65536

Total time 1 min, 52 sec

Acquisition date: Oct 13 2008

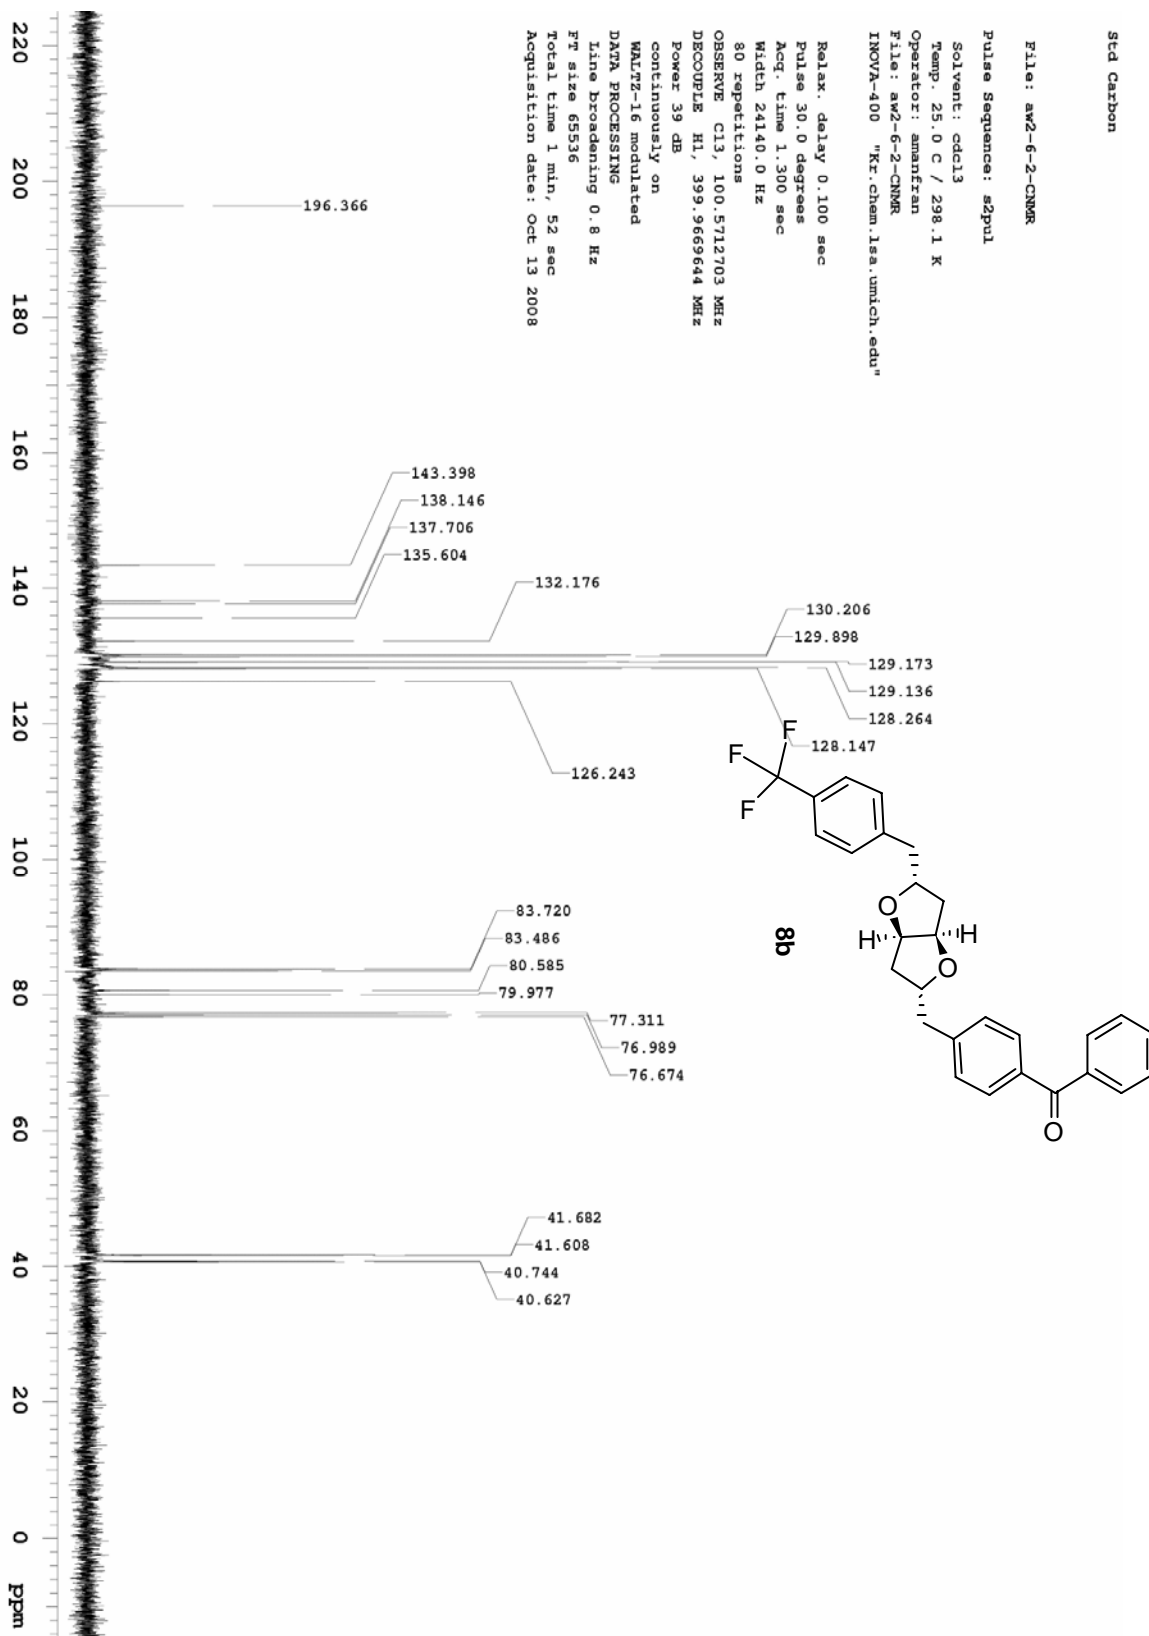

Std proton

File: aw2-7-1-HNMR

Pulse Sequence: szpu1

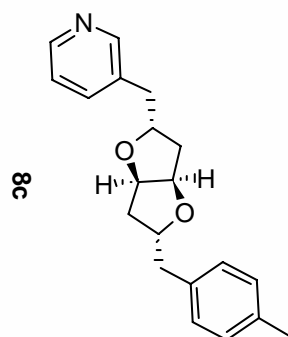

8c

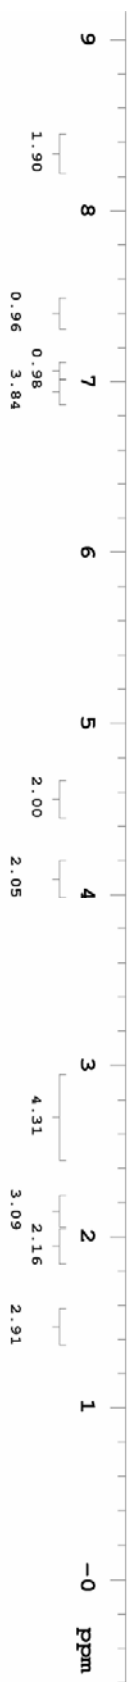



Std Carbon

File: aw2-7-1-CNMR

Pulse Sequence: szpul

Solvent: c6d6

Temp: 25.0 C / 298.1 K

Operator: amanfran

File: aw2-7-1-CNMR

INOVA-400 "Kr.chem.1sa.umich.edu"

Relax. delay 0.100 sec

Pulse 30.0 degrees

Acq. time 1.300 sec

Width 24140.0 Hz

192 repetitions

OBSERVE C13, 100.5712794 MHz

DECOUPLE H1, 399.9670004 MHz

Power 39 dB

continuously on

WALTZ-16 modulated

DATA PROCESSING

Line broadening 0.8 Hz

FT size 65536

Total time 4 min, 30 sec

Acquisition date: Oct 8 2008

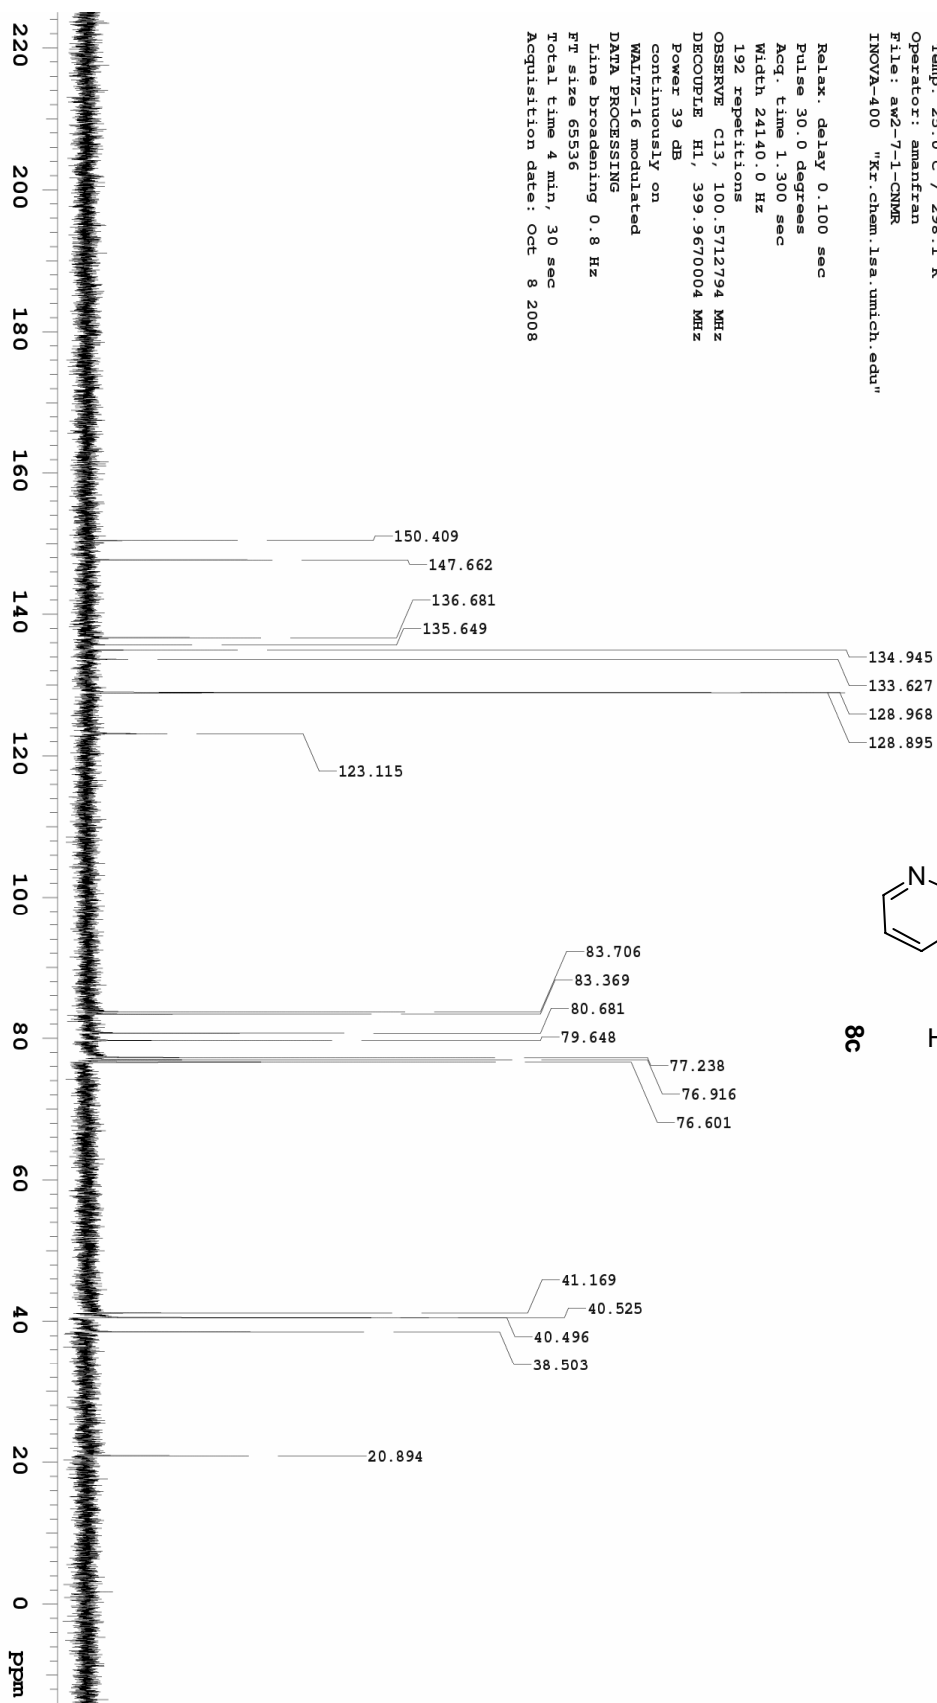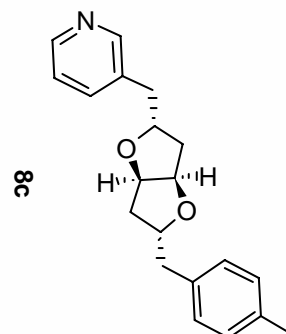

STANDARD PROTON PARAMETERS

File: aw1-162HNMR  
 Pulse Sequence: sZpul  
 Solvent: cdcl3  
 Ambient temperature  
 Operator: amanfran  
 File: aw1-162HNMR  
 VNMR5-400 "Kr.Chem.1sa.umich.edu"

Relax. delay 1.000 sec  
 Pulse 45.0 degrees  
 Acq. time 2.556 sec  
 Width 6410.3 Hz  
 8 repetitions  
 OBSERVE H1, 399.5389259 MHz  
 DATA PROCESSING  
 FT size 32768  
 Total time 0 min, 35 sec  
 Acquisition date: Jul 31 2008

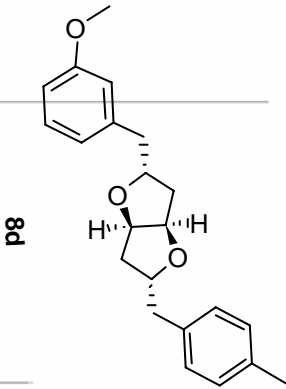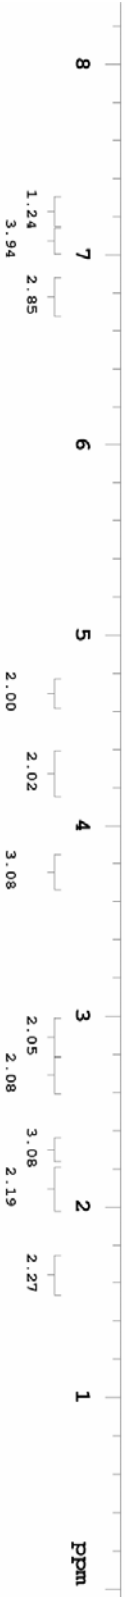

## STANDARD PROTON PARAMETERS

File: aw1-162CNMR

Pulse Sequence: szpul

Solvent: cdcl3

Ambient temperature

Operator: amantran

File: aw1-162CNMR

VNMR-400 "Kr. Chem. Isa. umich. edu"

Relax. delay 1.000 sec

Pulse 45.0 degrees

Acq. time 1.285 sec

Width 25510.2 Hz

144 repetitions

OBSERVE C13, 100.4641428 MHz

DECOUPLE H1, 399.5409236 MHz

Power 33 dB

continuously on

WALTZ-16 modulated

DATA PROCESSING

Line broadening 0.5 Hz

FT size 65536

Total time 5 min, 30 sec

Acquisition date: Jul 31 2008

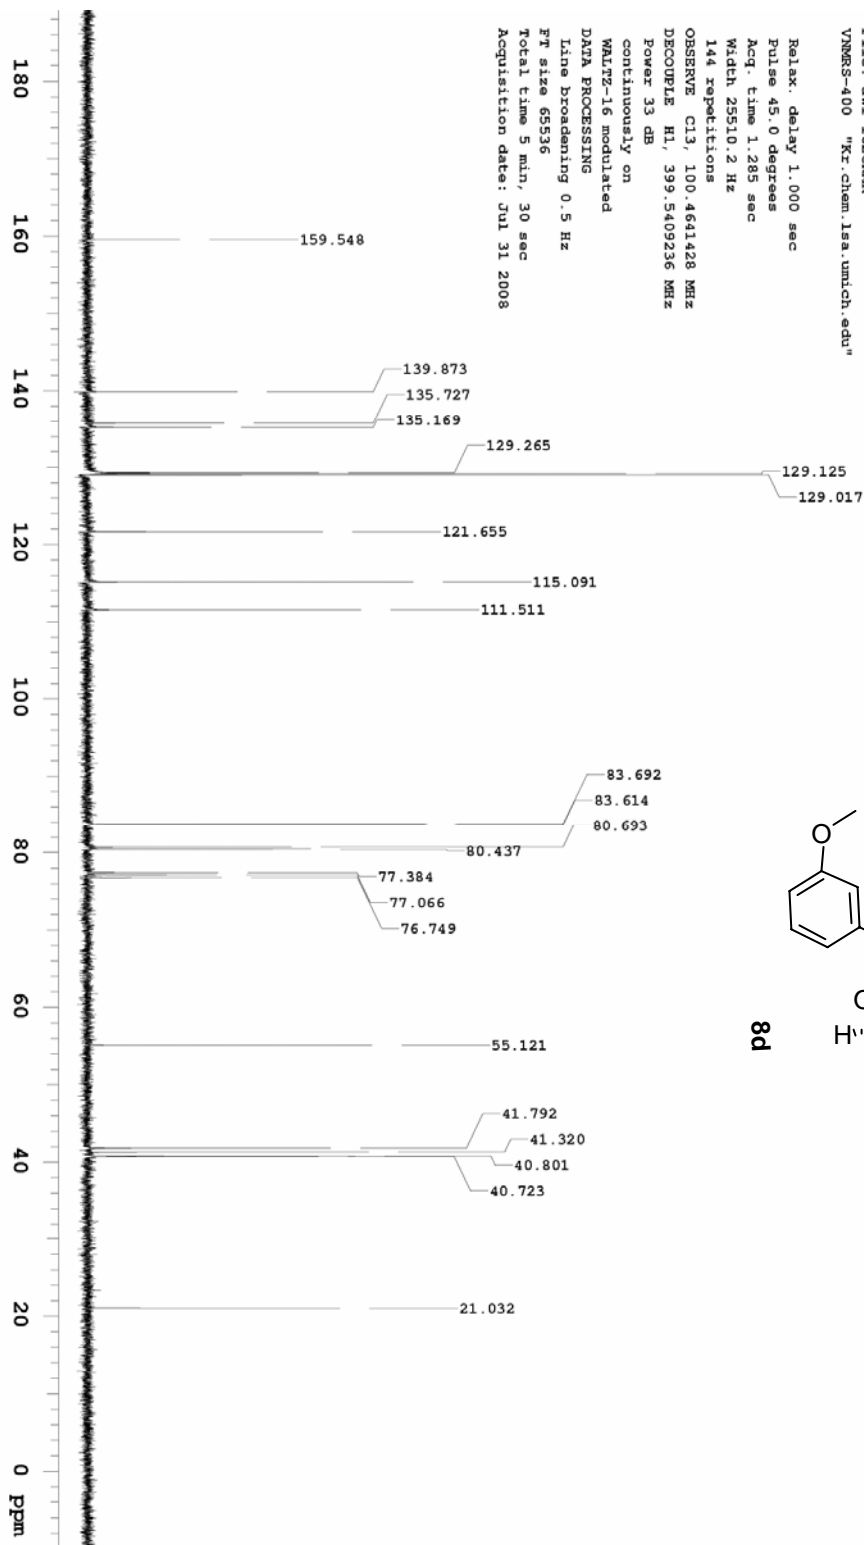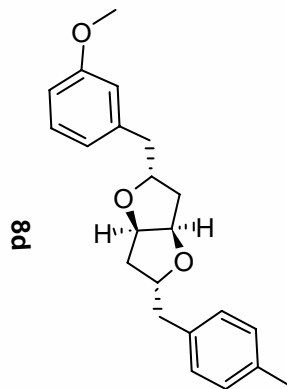

Std proton

File: aw1-158HNMR

Pulse Sequence: s2pu1

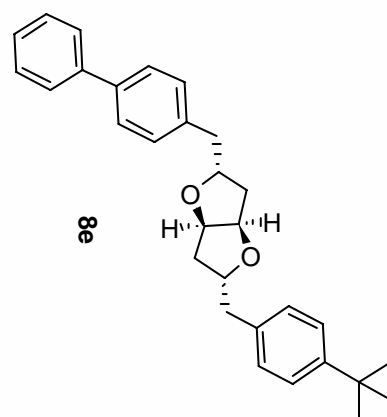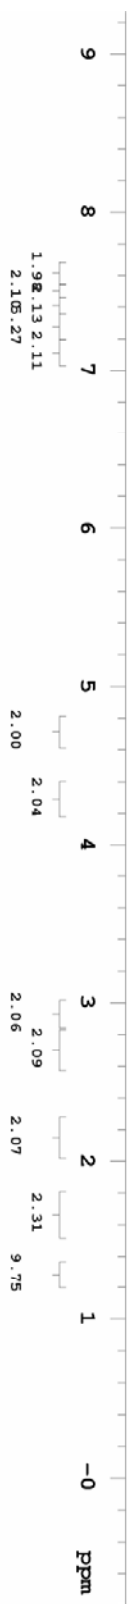

Std Carbon

File: aw1-158CNMR

Pulse Sequence: s2pu1

Solvent: cdcl3

Ambient temperature

Operator: amanfran

File: aw1-158CNMR

INNOVA-400 "Kr.chem.1sa.umich.edu"

Relax. delay 0.100 sec

Pulse 30.0 degrees

Acq. time 1.300 sec

Width 24140.0 Hz

224 repetitions

OBSERVE C13, 100.5712703 MHz

DECOUPLE H1, 399.9669644 MHz

Power 39 dB

continuously on

WALTZ-16 modulated

DATA PROCESSING

Line broadening 0.8 Hz

FT size 65536

Total time 5 min, 15 sec

Acquisition date: Jul 25 2008

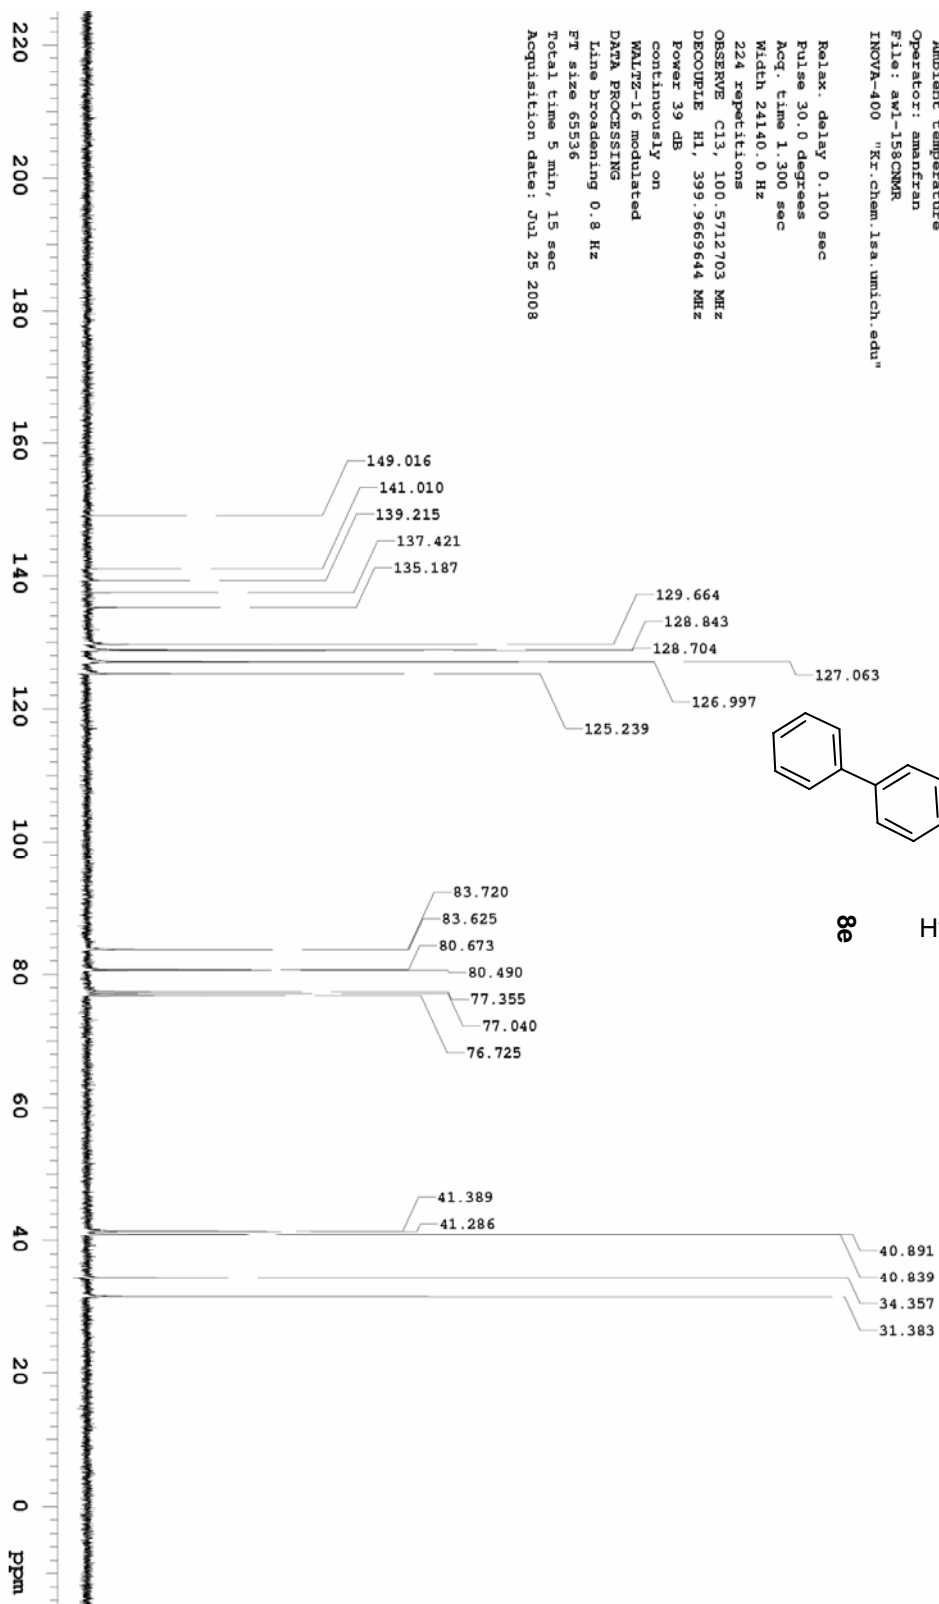

STANDARD PROTON PARAMETERS

File: sw1-161HNR

Pulse Sequence: s2pul

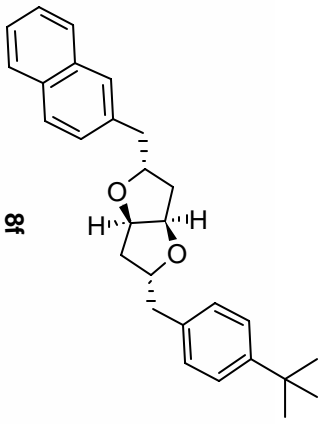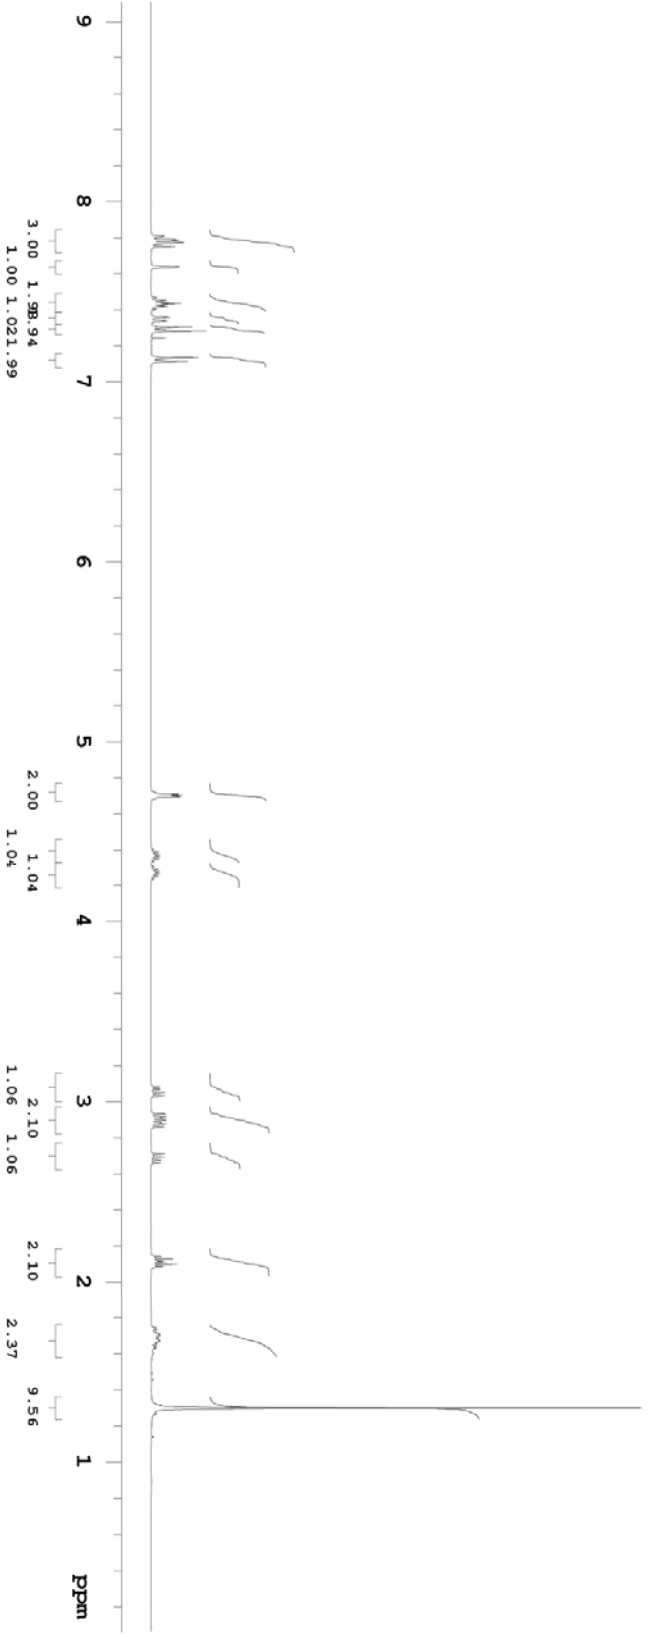

## STANDARD PROTON PARAMETERS

File: aw1-161CNMR

Pulse Sequence: s2pul

Solvent: cdcl3

Ambient temperature

Operator: amantran

File: aw1-161CNMR

VNMR-400 "Kr.chem.lsa.umich.edu"

Relax. delay 1.000 sec

Pulse 45.0 degrees

Acq. time 1.285 sec

Width 25510.2 Hz

256 repetitions

OBSERVE C13, 100.4641428 MHz

DECOUPLE H1, 399.5409236 MHz

Power 33 dB

continuously on

WALTZ-16 modulated

DATA PROCESSING

Line Broadening 0.5 Hz

FT size 65536

Total time 9 min, 47 sec

Acquisition date: Jul 31 2008

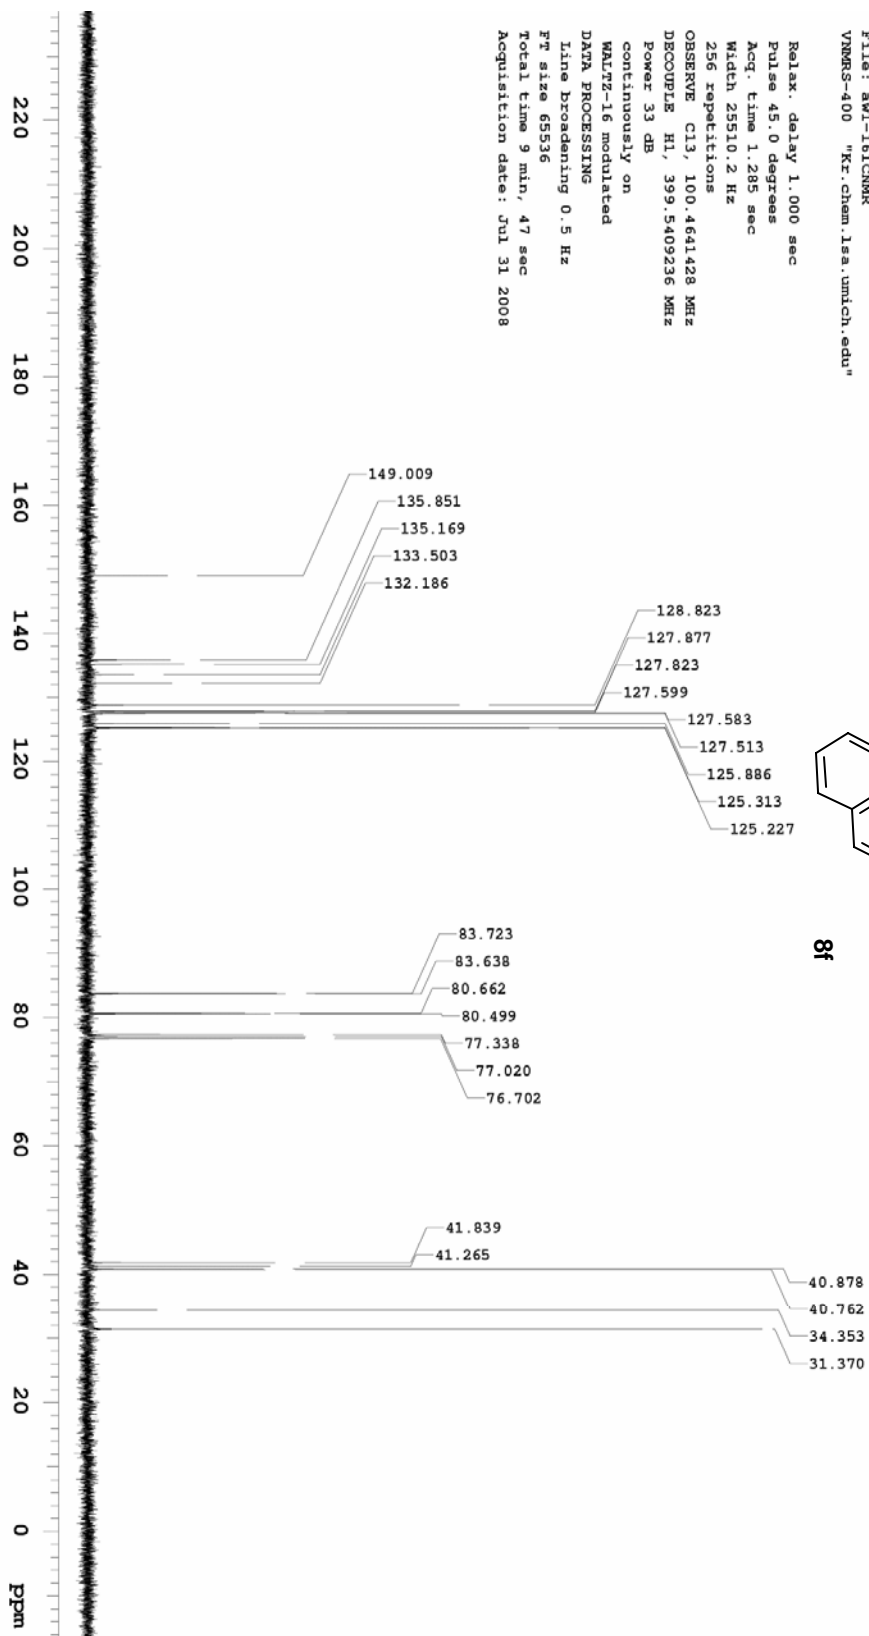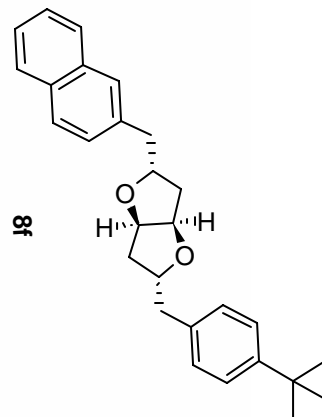

STANDARD PROTON PARAMETERS

File: aw1-161-cosy  
 Pulse Sequence: gcosy  
 Solvent: cdcl3  
 Temp: 22.0 C / 295.1 K  
 Operator: amanfran  
 File: aw1-161-cosy  
 VNMRS-400 "Kr-chem.1sa.umtch.edu"

Relax. delay 1.000 sec  
 Acq. time 0.150 sec  
 Width 3633.7 Hz  
 20 Width 3633.7 Hz  
 2 repetitions  
 128 increments  
 OBSERVE H1, 399, 5389259 MHz  
 DATA PROCESSING  
 Sq. sine bell 0.075 sec  
 F1 DATA PROCESSING  
 Sq. sine bell 0.035 sec  
 FT size 2048 x 2048  
 Total time 5 min., 46 sec  
 Acquisition date: Aug 12 2008

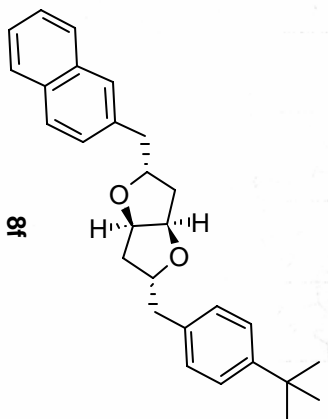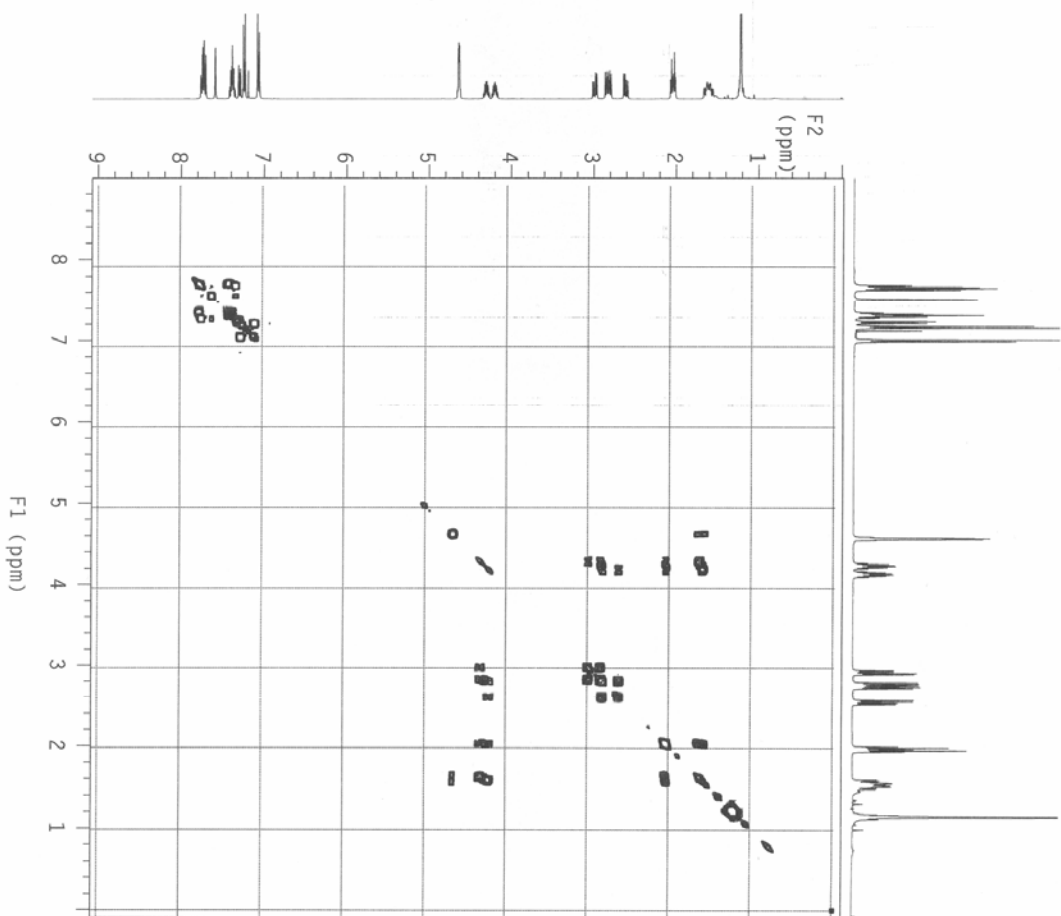



## STANDARD PROTON PARAMETERS

File: awl-161-Noesy  
Pulse Sequence: NOESY  
Solvent: cdc13  
Ambient temperature  
Operator: amantran  
File: awl-161-Noesy  
VMRMS-400 "Kr.chem.1sa.umfch.edu"

Relax. delay 1.000 sec  
Acq. time 0.190 sec  
Width 3612.7 Hz  
2D Width 3612.7 Hz  
4 repetitions  
2 x 128 increments  
OBSERVE H1. 399.5389259 MHz  
DATA PROCESSING  
Gauss apodization 0.069 sec  
F1 DATA PROCESSING  
Gauss apodization 0.033 sec  
FT size 2048 x 2048  
Total time 20 min, 50 sec  
Acquisition date: Jul 31 2008

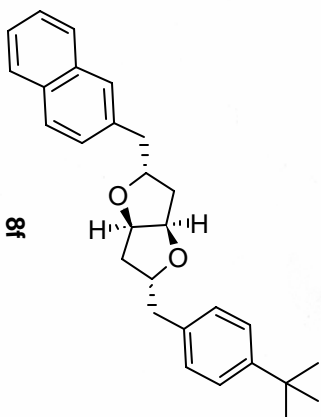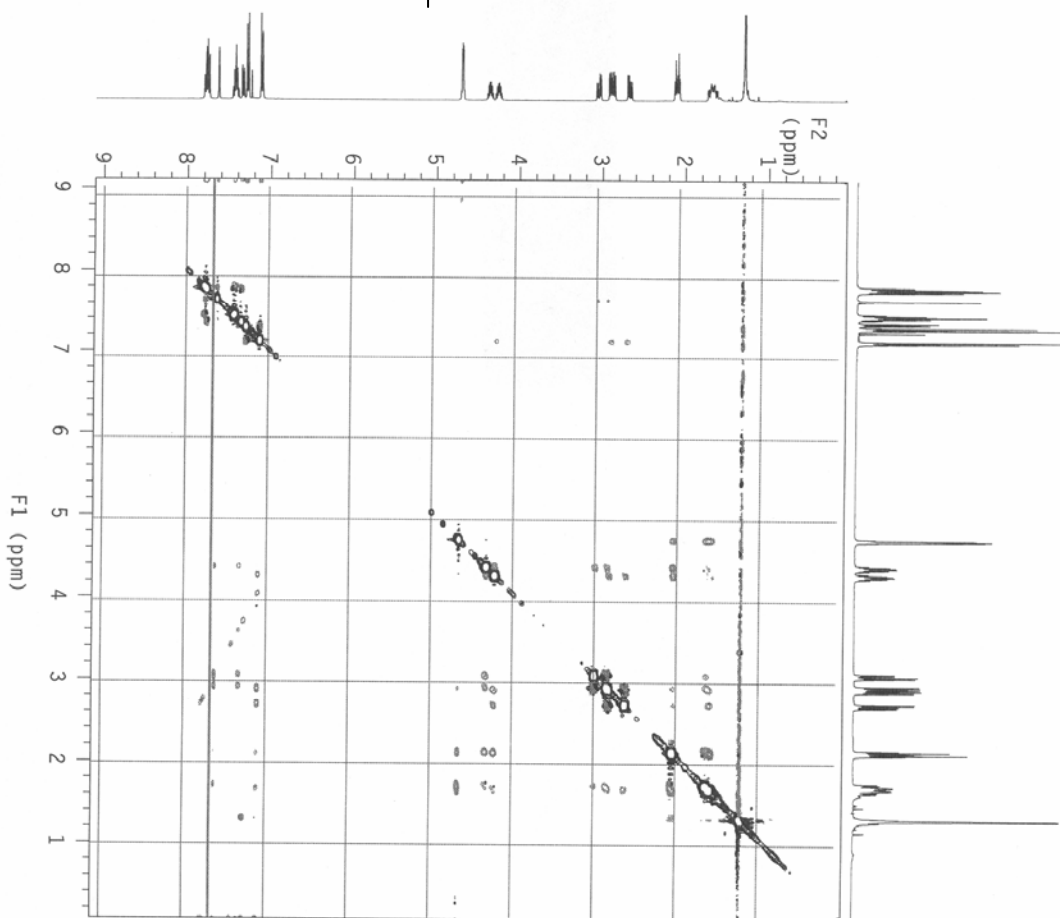

## STANDARD PROTON PARAMETERS

File: aw2-3-1-HNMR

Pulse Sequence: s2pul

Solvent: cdcl3

Temp: 22.0 C / 295.1 K

Operator: amantran

File: aw2-3-1-HNMR

VNMR-400 "Kr.chem.lsa.umich.edu"

Relax. delay 1.000 sec

Pulse 45.0 degrees

Acq. time 2.556 sec

Width 6410.3 Hz

8 repetitions

OBSERVE H1, 399.5389259 MHz

DATA PROCESSING

Ft size 32768

Total time 0 min, 35 sec

Acquisition date: Oct 7 2008

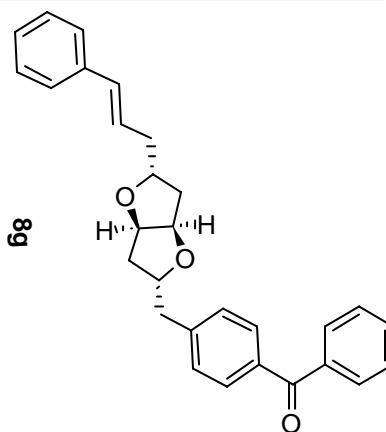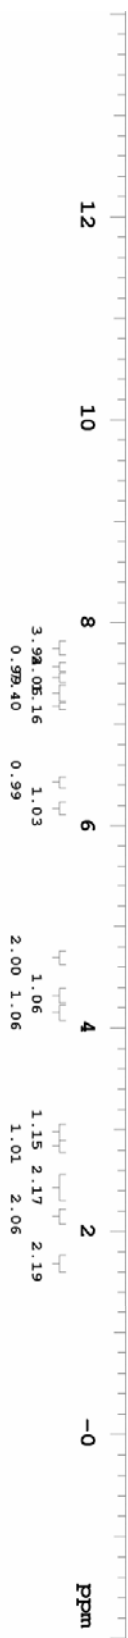

Std Carbon

File: aw2-3-1-CNMR

Pulse Sequence: s2pul

Solvent: c6d6

Temp: 25.0 C / 298.1 K

Operator: amanfran

File: aw2-3-1-CNMR  
INOVA-400 "Kr.chem.lsa.umich.edu"

Relax. delay 0.100 sec

Pulse 30.0 degrees

Acq. time 1.300 sec

Width 24140.0 Hz

192 repetitions

OBSERVE C13, 100.5712794 MHz

DECOUPLE H1, 399.9670004 MHz

Power 39 dB

continuously on

MALTZ-16 modulated

DATA PROCESSING

Line broadening 0.8 Hz

FT size 65536

Total time 4 min, 30 sec

Acquisition date: Oct 8 2008

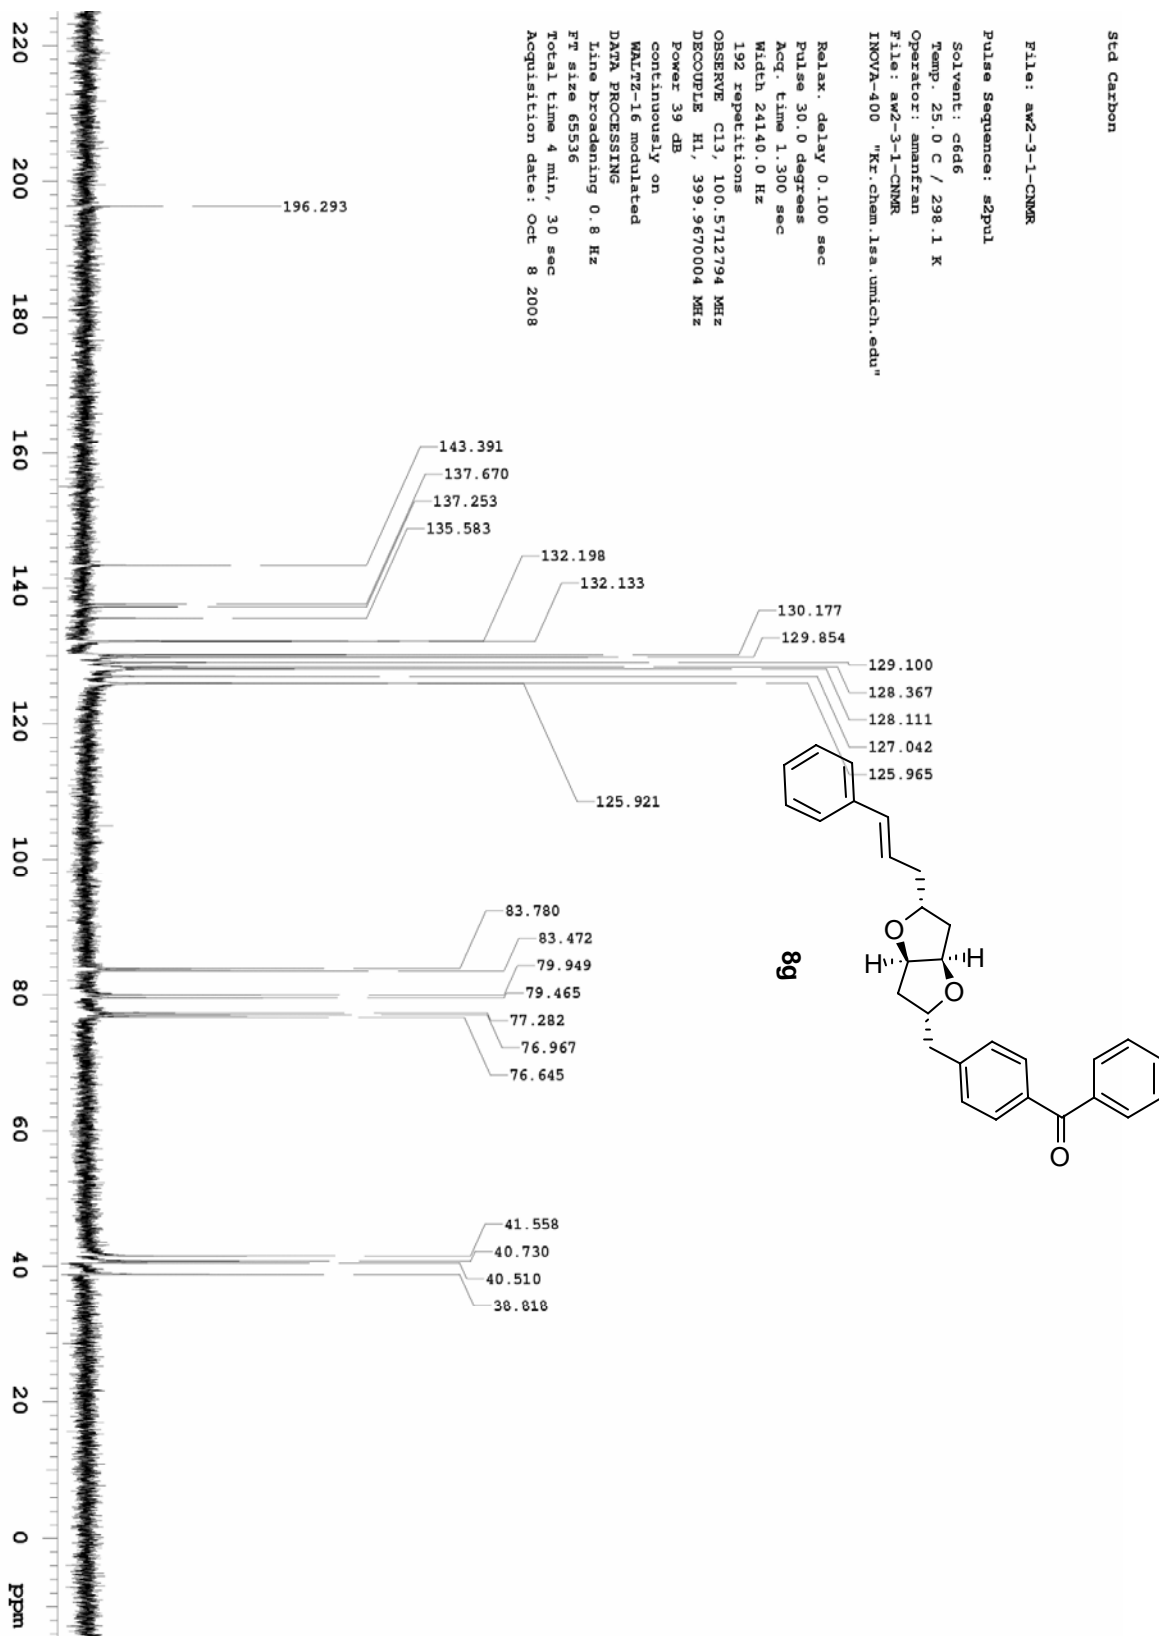

## STANDARD PROTON PARAMETERS

File: aw2-7-2-FINMR

Pulse Sequence: s2pul

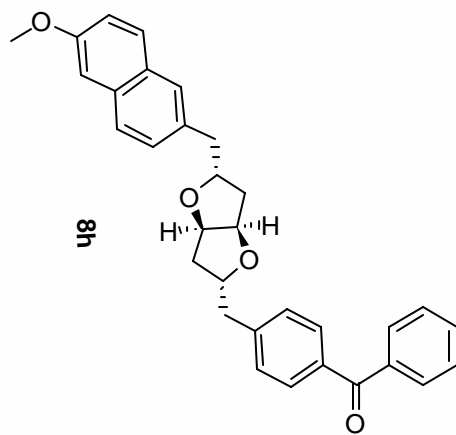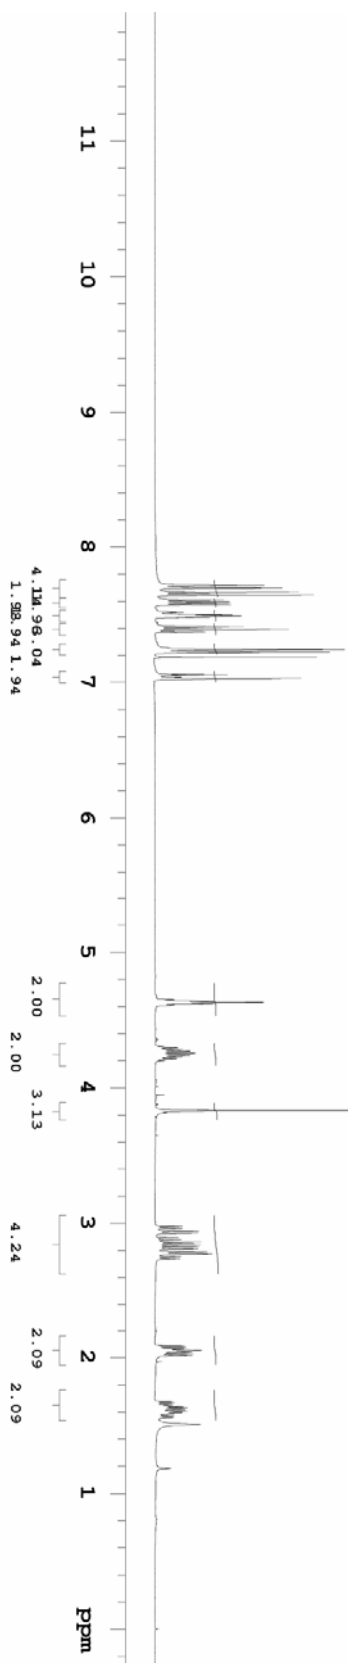

Std Carbon

File: aw2-7-2-CNMR

Pulse Sequence: s2pul

Solvent: c6d6

Ambient temperature

Operator: amanfran

File: aw2-7-2-CNMR  
INOVA-400 "Kr.chem.lsa.umich.edu"

Relax. delay 0.100 sec

Pulse 30.0 degrees

Acq. time 1.300 sec

Width 24140.0 Hz

432 repetitions

OBSERVE C13, 100.5712794 MHz

DECOUPLE H1, 399.9670004 MHz

Power 39 dB

continuously on

MALTZ-16 modulated

DATA PROCESSING

Line broadening 0.8 Hz

F2 size 65536

Total time 10 min, 8 sec

Acquisition date: Oct 8 2008

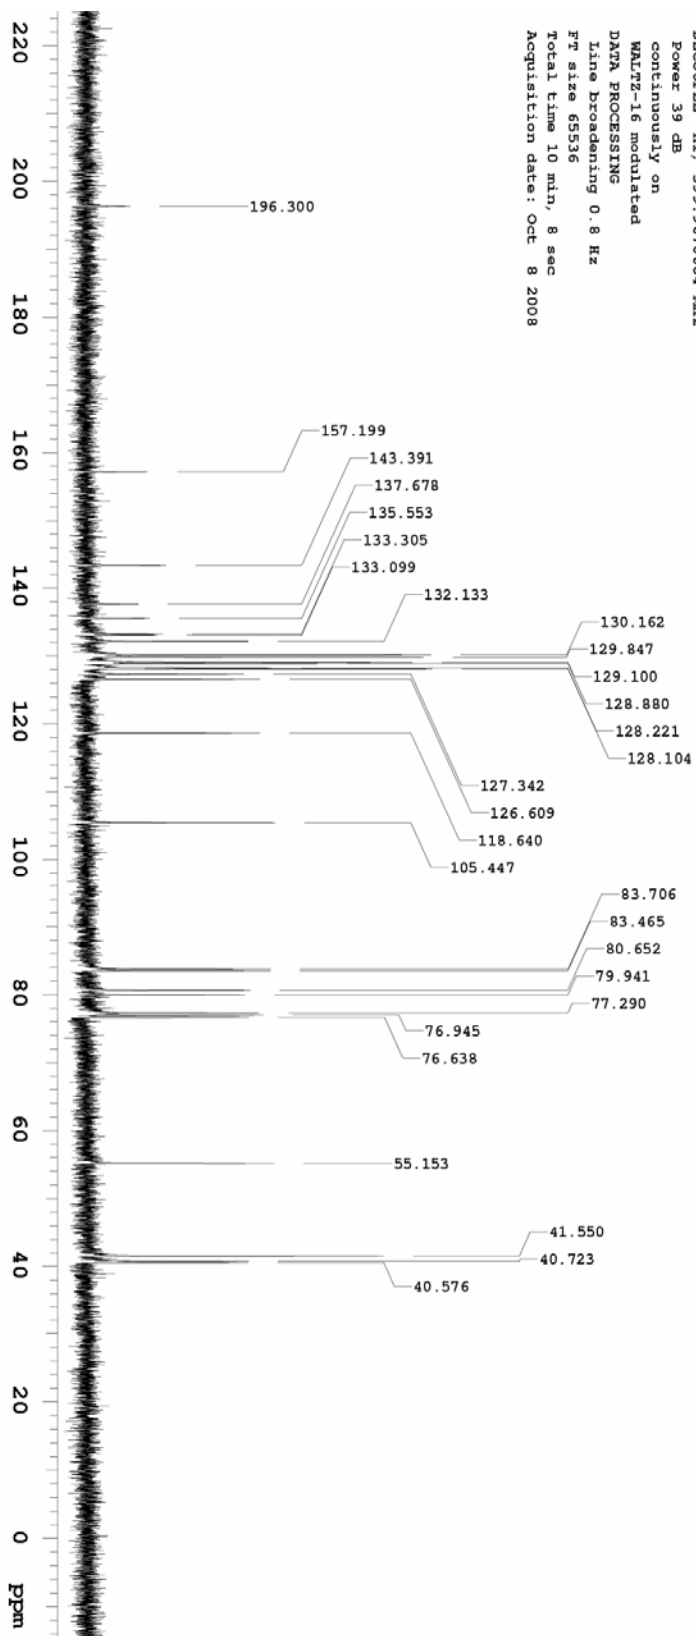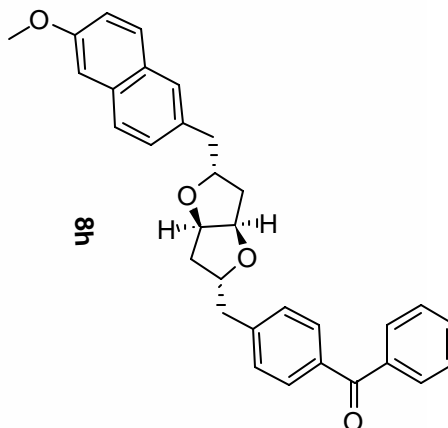

STANDARD 1H OBSERVE - profile

File: aw1-141-HNMR

Pulse Sequence: s2pul

Solvent: cdcl3

Temp: 22.0 C / 295.1 K

Operator: amantran

File: aw1-141-HNMR

VNMRB-400 "Kr.chem.lsa.umich.edu"

Relax. delay 1.000 sec

Pulse 45.0 degrees

Acq. time 2.556 sec

Width 6410.3 Hz

32 repetitions

OBSERVE H1, 399.5389478 MHz

DATA PROCESSING

Ft size 32768

Total time 2 min, 1 sec

Acquisition date: Sep 8 2008

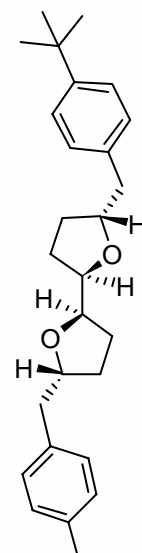

10a

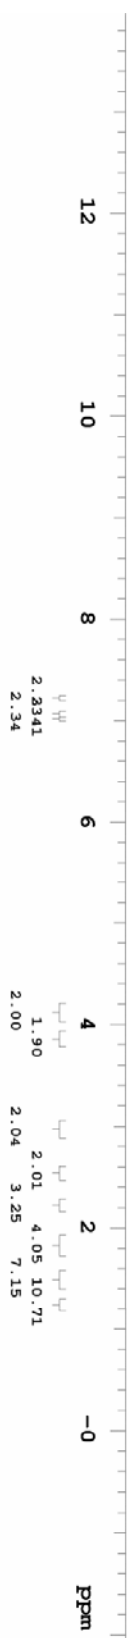

## STANDARD PROTON PARAMETERS

File: aw1-141CNMR

Pulse Sequence: szpul

Solvent: CDCl3

Ambient temperature

Operator: amanfran

File: aw1-141CNMR

VNMRB-401 "Kr.Chem.1sa.rp19.edu"

10a

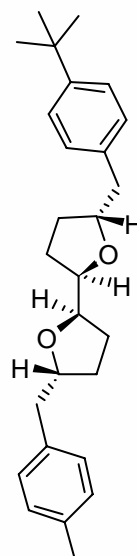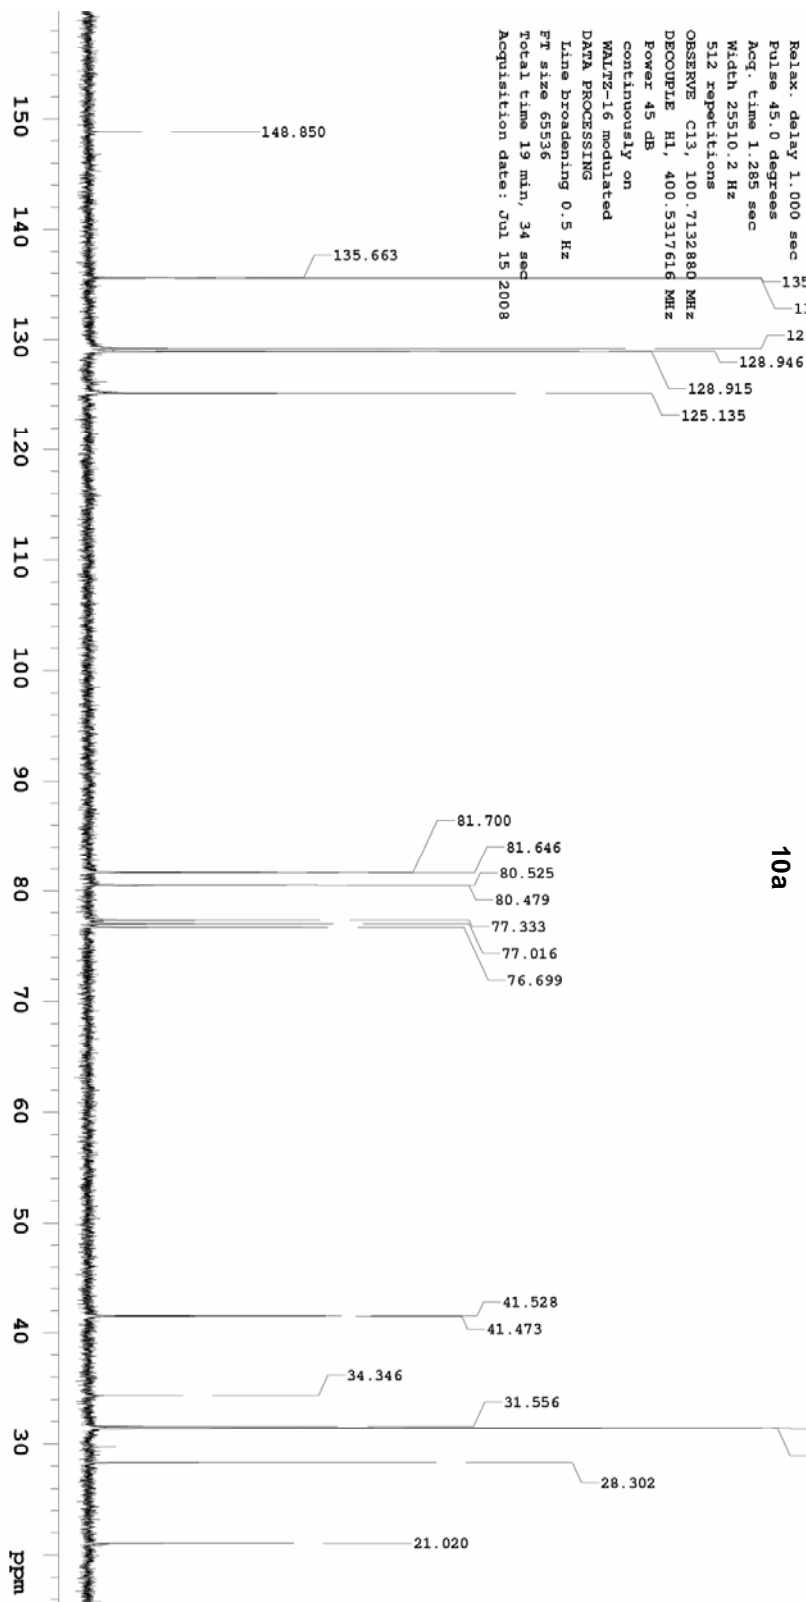

Std proton

File: aw1-147HNMR  
 Pulse Sequence: s2pul  
 Solvent: cdcl3  
 Temp: 25.0 C / 298.1 K  
 Operator: amanfran  
 File: aw1-147HNMR  
 INOVA-400 "Kr.chem.lsa.umich.edu"

Relax. delay 0.500 sec  
 Pulse 45.0 degrees  
 Acq. time 3.000 sec  
 Width 6399.5 Hz  
 16 repetitions  
 OBSERVE H1, 399.9643645 MHz  
 DATA PROCESSING  
 Line broadening 0.2 Hz  
 FT size 65536  
 Total time 1 min, 3 sec  
 Acquisition date: Jul 23 2008

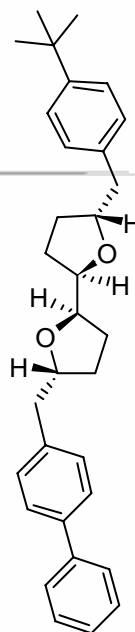

10b

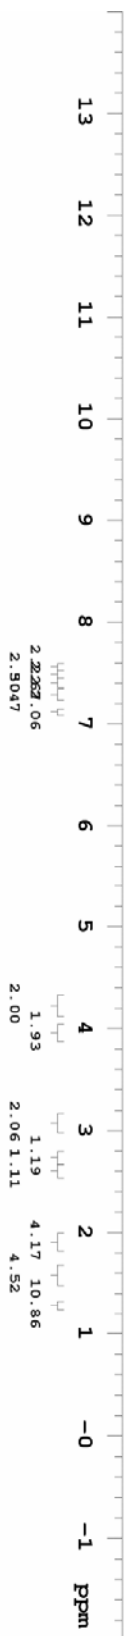



Std Carbon

File: aw1-147CNMR  
 Pulse Sequence: szpul  
 Solvent: cdcl3  
 Temp: 25.0 C / 298.1 K  
 Operator: amanfran  
 File: aw1-147CNMR  
 INOVA-400 "Kf.chem.lsa.umich.edu"

Relax. delay 0.100 sec  
 Pulse 30.0 degrees  
 Acq. time 1.300 sec  
 Width 24140.0 Hz  
 368 repetitions  
 OBSERVE C13, 100.5712703 MHz  
 DECOUPLE H1, 399.9669644 MHz  
 Power 39 dB  
 continuously on  
 WALTZ-16 modulated  
 DATA PROCESSING  
 Line broadening 0.8 Hz  
 FT size 65536  
 Total time 8 min, 38 sec  
 Acquisition date: Jul 23 2008

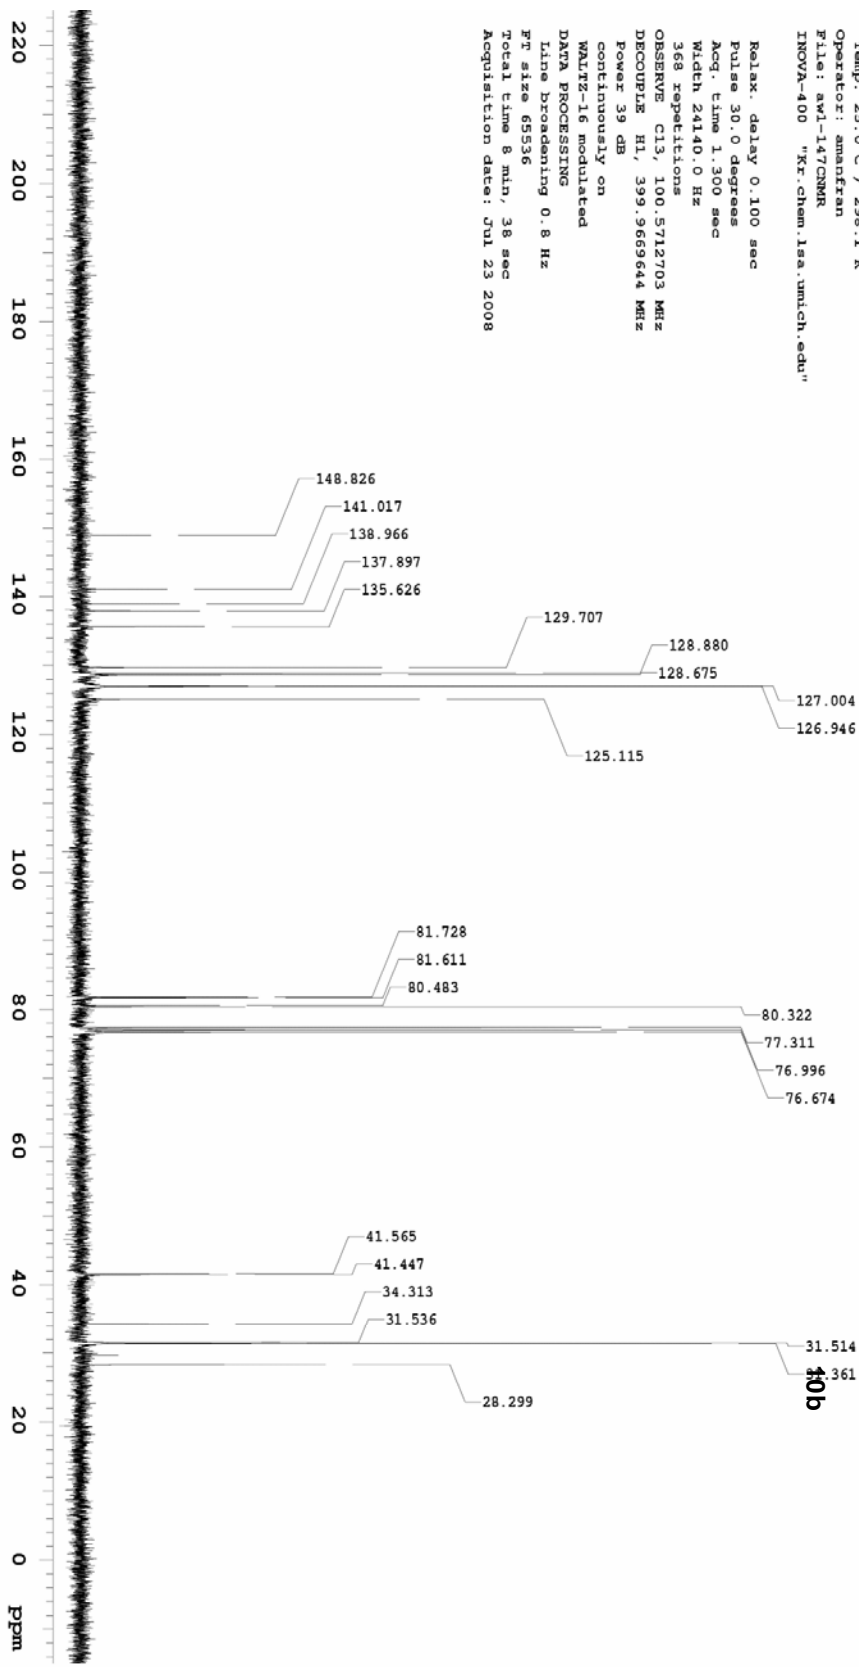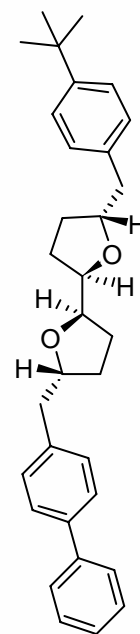

Std proton

File: aw1-175-pure

Pulse Sequence: szpul

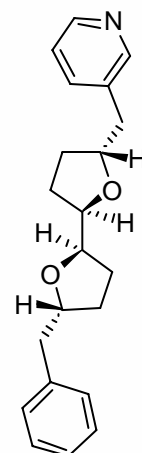

10c

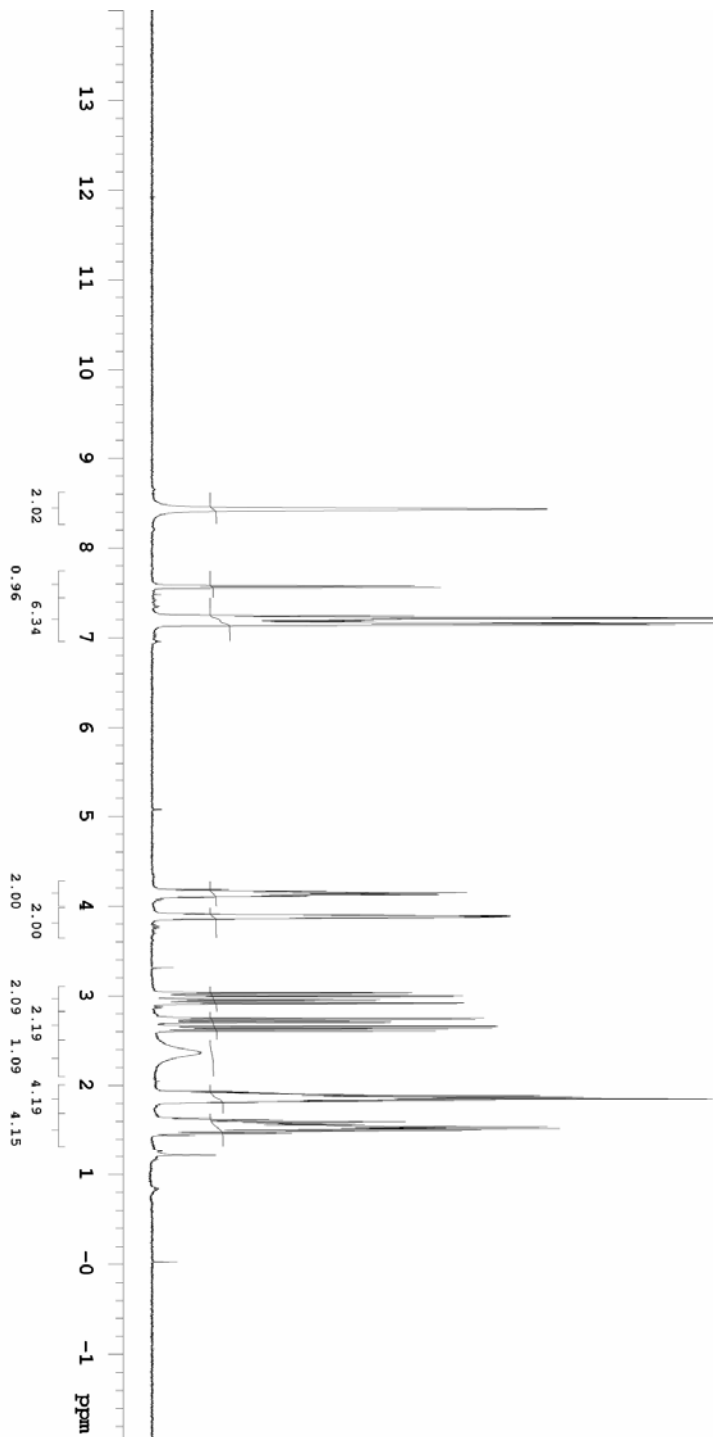

## STANDARD PROTON PARAMETERS

File: aw1-175-CNMR  
 Pulse Sequence: szpul  
 Solvent: cdcl3  
 Temp: 25.0 C / 298.1 K  
 Operator: amantran  
 File: aw1-175-CNMR  
 VNMR5-401 "K.chem.lsa.umich.edu"

Relax. delay 1.000 sec  
 Pulse 45.0 degrees  
 Acq. time 1.285 sec  
 Width 25510.2 Hz  
 176 repetitions  
 OBSERVE C13, 100.7132880 MHz  
 DECOUPLE H1, 400.5317616 MHz  
 Power 40 dB  
 continuously on  
 WALTZ-16 modulated  
 DATA PROCESSING  
 Line Broadening 0.5 Hz  
 F2 size 65536  
 Total time 6 min, 43 sec  
 Acquisition date: Aug 20 2008

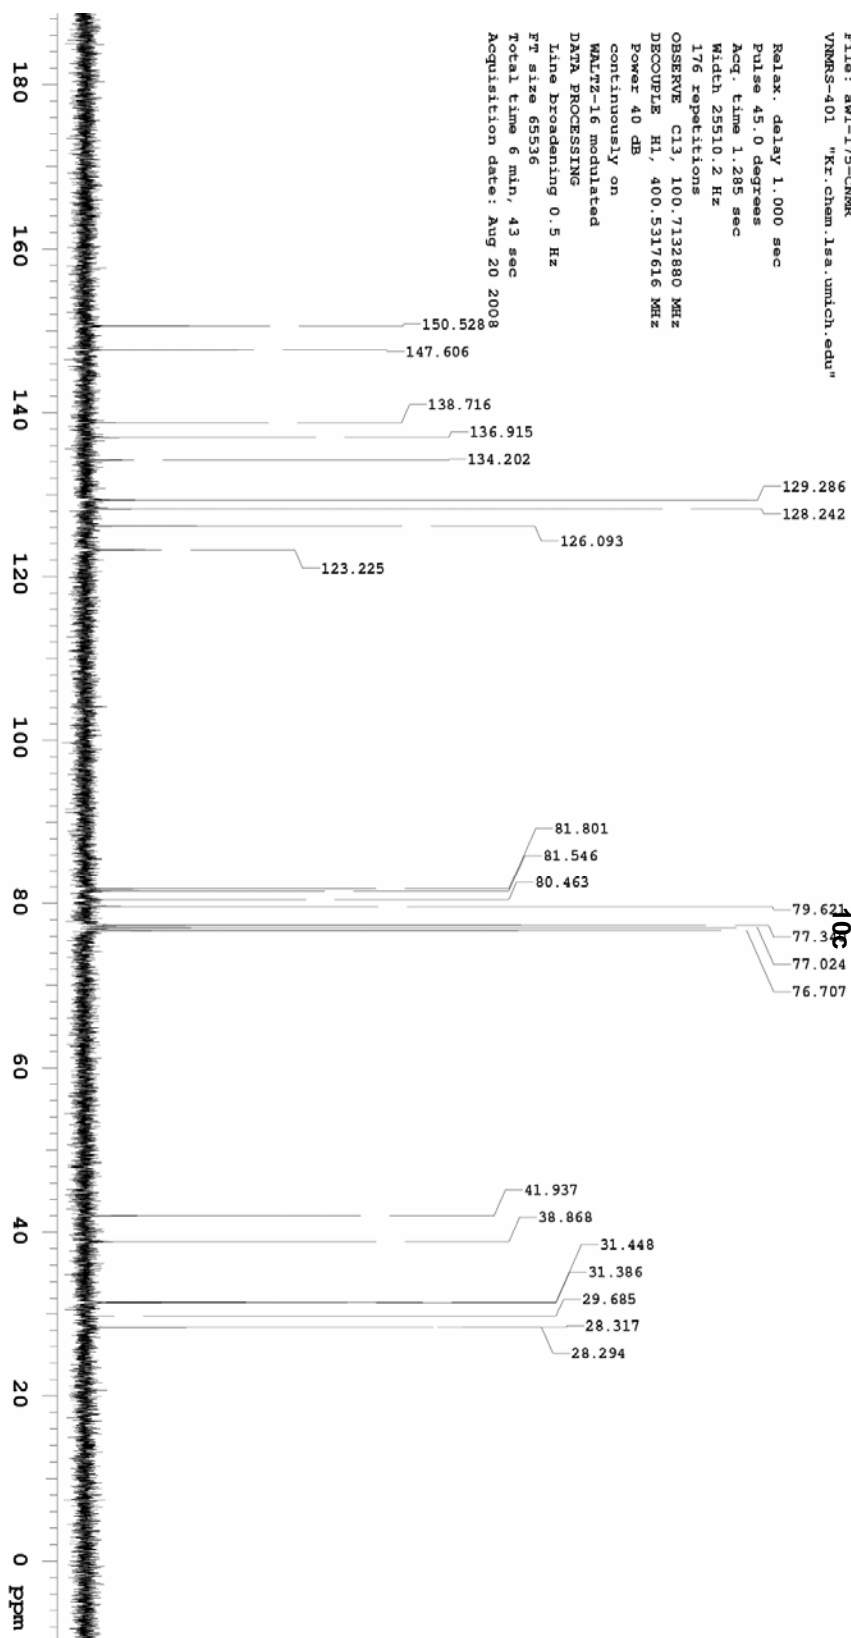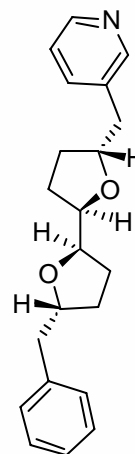

Std proton

File: aw1-189-HNMR-prop

Pulse Sequence: s2pul

Temp: 24.0 C / 297.1 K

Operator: amanfran

File: aw1-189-HNMR-prop

INOVA-400 "Kr.Chem.1sa.umich.edu"

Relax. delay 0.500 sec

Pulse 45.0 degrees

Acq. time 3.000 sec

Width 6399.5 Hz

8 repetitions

OBSERVE H1, 399.9658604 MHz

DATA PROCESSING

Line Broadening 0.2 Hz

FT size 65536

Total time 0 min, 35 sec

Acquisition date: Jan 15 2009

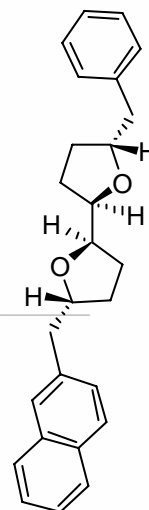

10d

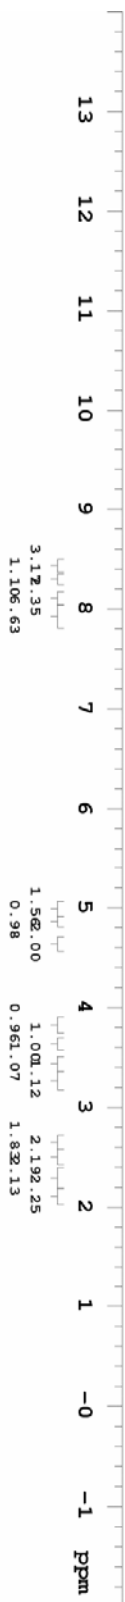

Std Carbon

File: aw1-189-CNMK

Pulse Sequence: szpul

Solvent: cdcl3

Ambient temperature

Operator: amanfran

File: aw1-189-CNMK

INOVA-400 "Kr.chem.1sa.umich.edu"

Relax. delay 0.100 sec

Pulse 30.0 degrees

Acq. time 1.300 sec

Width 24140.0 Hz

238 repetitions

OBSERVE C13, 100.5712703 MHz

DECOUPLE H1, 399.9669644 MHz

Power 39 dB

continuously on

WALTZ-16 modulated

DATA PROCESSING

Line broadening 0.8 Hz

FT size 65536

Total time 6 min, 45 sec

Acquisition date: Jan 15 2009

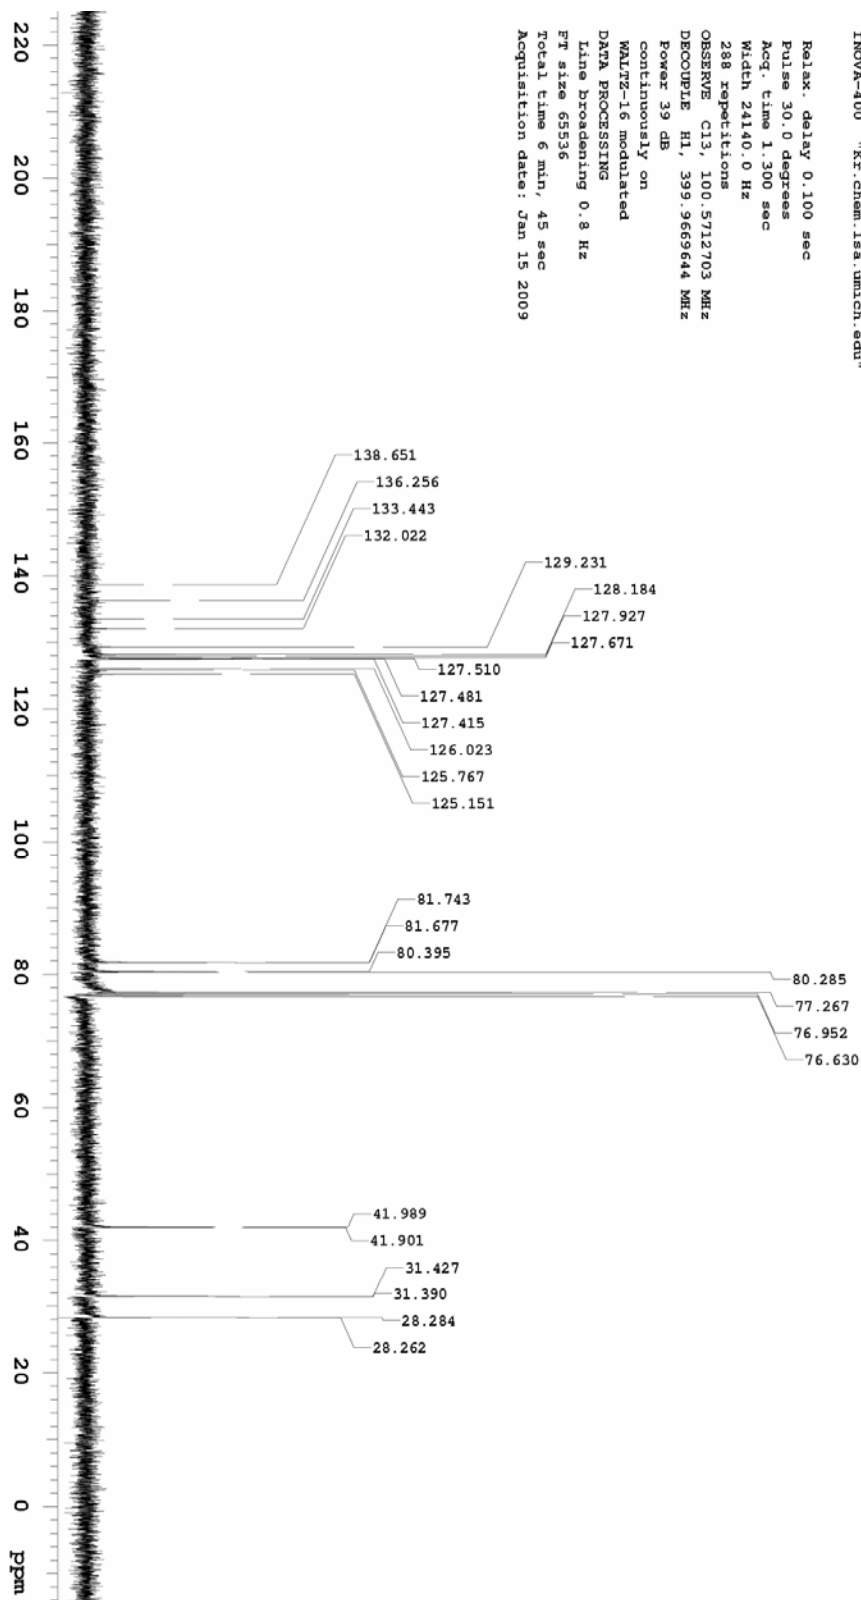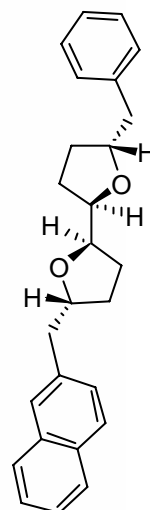

STANDARD 1H OBSERVE - profile

File: aw1-194-HNMR

Pulse Sequence: s2pul

Solvent: cdcl3

Temp: 22.0 C / 295.1 K

Operator: amantran

File: aw1-194-HNMR

YNNRS-400 "K:chem.lsa.umich.edu"

Relax. delay 1.000 sec

Pulse 45.0 degrees

Acq. time 2.556 sec

Width 6410.3 Hz

8 repetitions

OBSERVE H1, 399.5389259 MHz

DATA PROCESSING

Ft size 32768

Total time 0 min, 35 sec

Acquisition date: Sep 13 2008

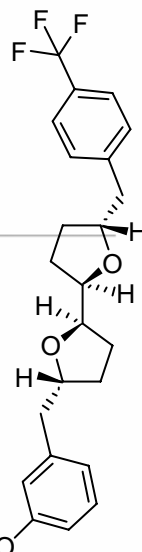

10e

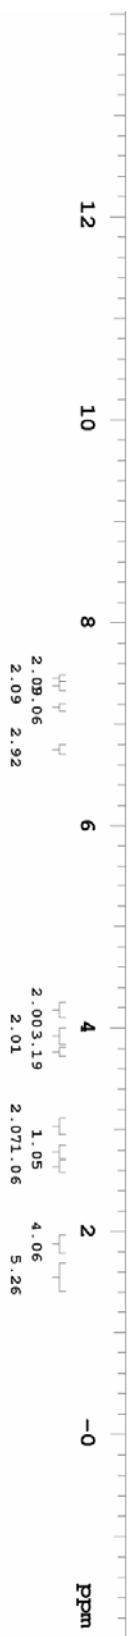

STANDARD 1H OBSERVE - profile  
 File: awl-194-CNMR  
 Pulse Sequence: szpul  
 Solvent: cdcl3  
 Ambient Temperature  
 Operator: amanfran  
 File: awl-194-CNMR  
 VNMR-400 "K.chem.lsa.umich.edu"

Relax. delay 1.000 sec  
 Pulse 45.0 degrees  
 Acq. time 1.285 sec  
 Width 25510.2 Hz  
 Single scan  
 OBSERVE C13, 100.4641428 MHz  
 DECOUPLE H1, 399.5409236 MHz  
 Power 33 dB  
 continuously on  
 WALTZ-16 modulated  
 DATA PROCESSING  
 Line Broadening 0.5 Hz  
 F2 size 65536  
 Total time 0 min, 2 sec  
 Acquisition date: Sep 13 2008

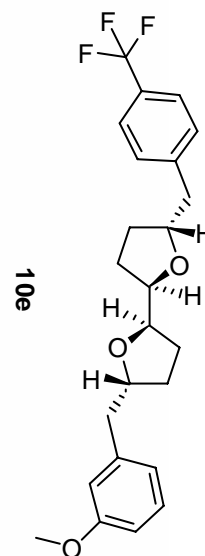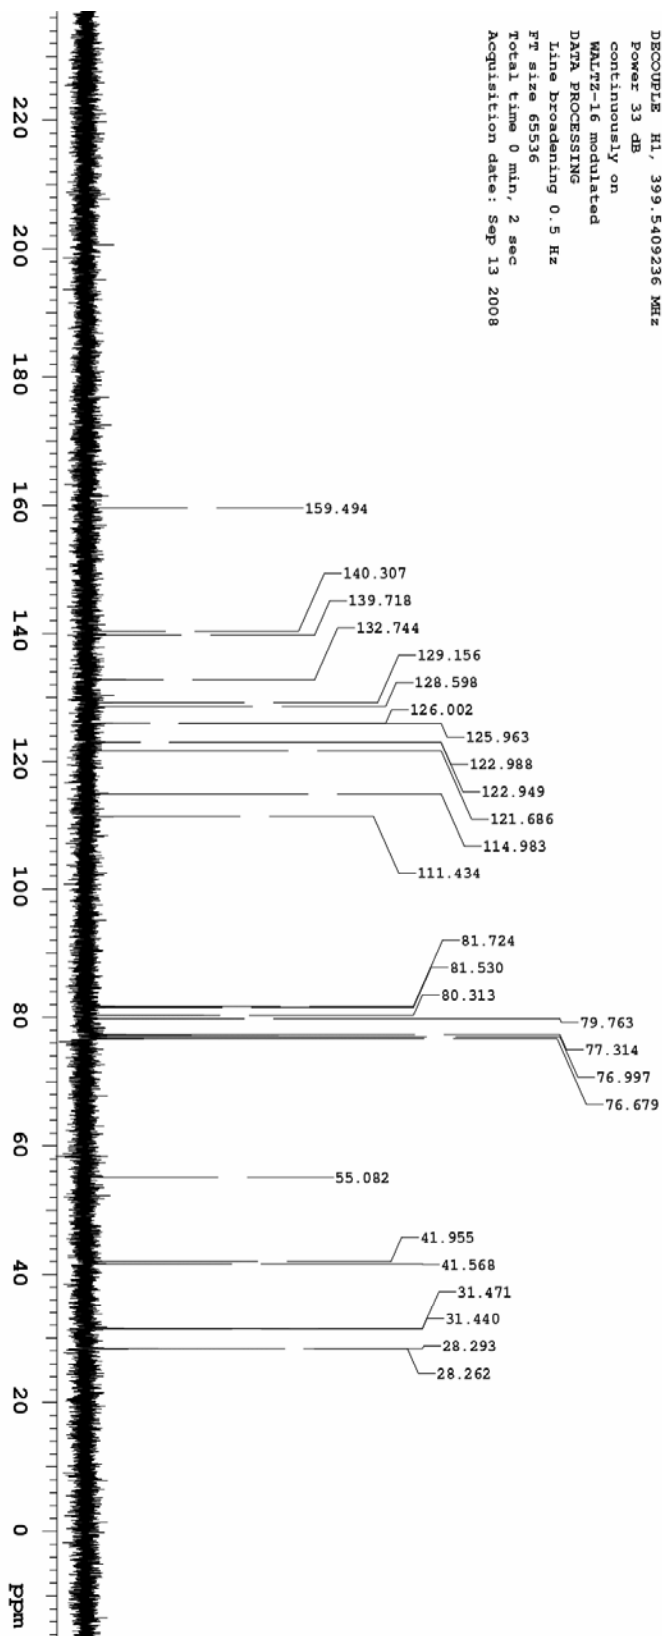

## STANDARD PROTON PARAMETERS

File: aw1-198-HNMR

Pulse Sequence: szpul

Solvent: cdcl3

Ambient temperature

Operator: amanfran

File: aw1-198-HNMR

VNMR5-401 "Kr.chem.1sa.umich.edu"

Relax. delay 1.000 sec

Pulse 45.0 degrees

Acq. time 2.556 sec

Width 6410.3 Hz

8 repetitions

OBSERVE H1, 400.5297589 MHz

DATA PROCESSING

FT size 32768

Total time 0 min, 35 sec

Acquisition date: Sep 17 2008

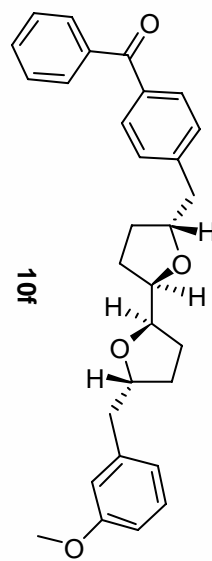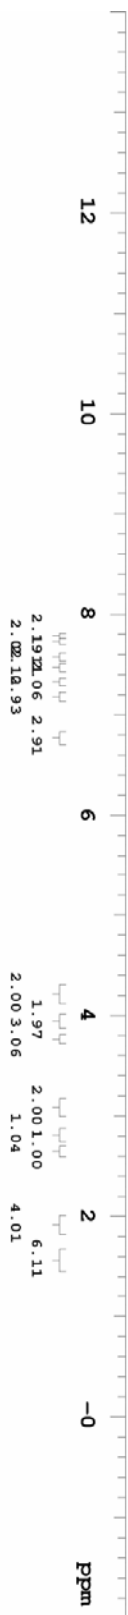



## STANDARD PROTON PARAMETERS

File: aw1-198-CNMR  
 Pulse Sequence: s2pul  
 Solvent: cdcl3  
 Temp: 10.0 C / 283.1 K  
 Operator: amantran  
 File: aw1-198-CNMR  
 YNMRS-401 "K.chem.lsa.umich.edu"

Relax. delay 1.000 sec  
 Pulse 45.0 degrees  
 Acq. time 1.285 sec  
 Width 25510.2 Hz  
 240 repetitions  
 OBSERVE C13, 100.7132880 MHz  
 DECOUPLE H1, 400.5317616 MHz  
 Power 40 dB  
 continuously on  
 WALTZ-16 modulated  
 DATA PROCESSING  
 Line Broadening 0.5 Hz  
 FT size 65536  
 Total time 9 min, 10 sec  
 Acquisition date: Sep 16 2008

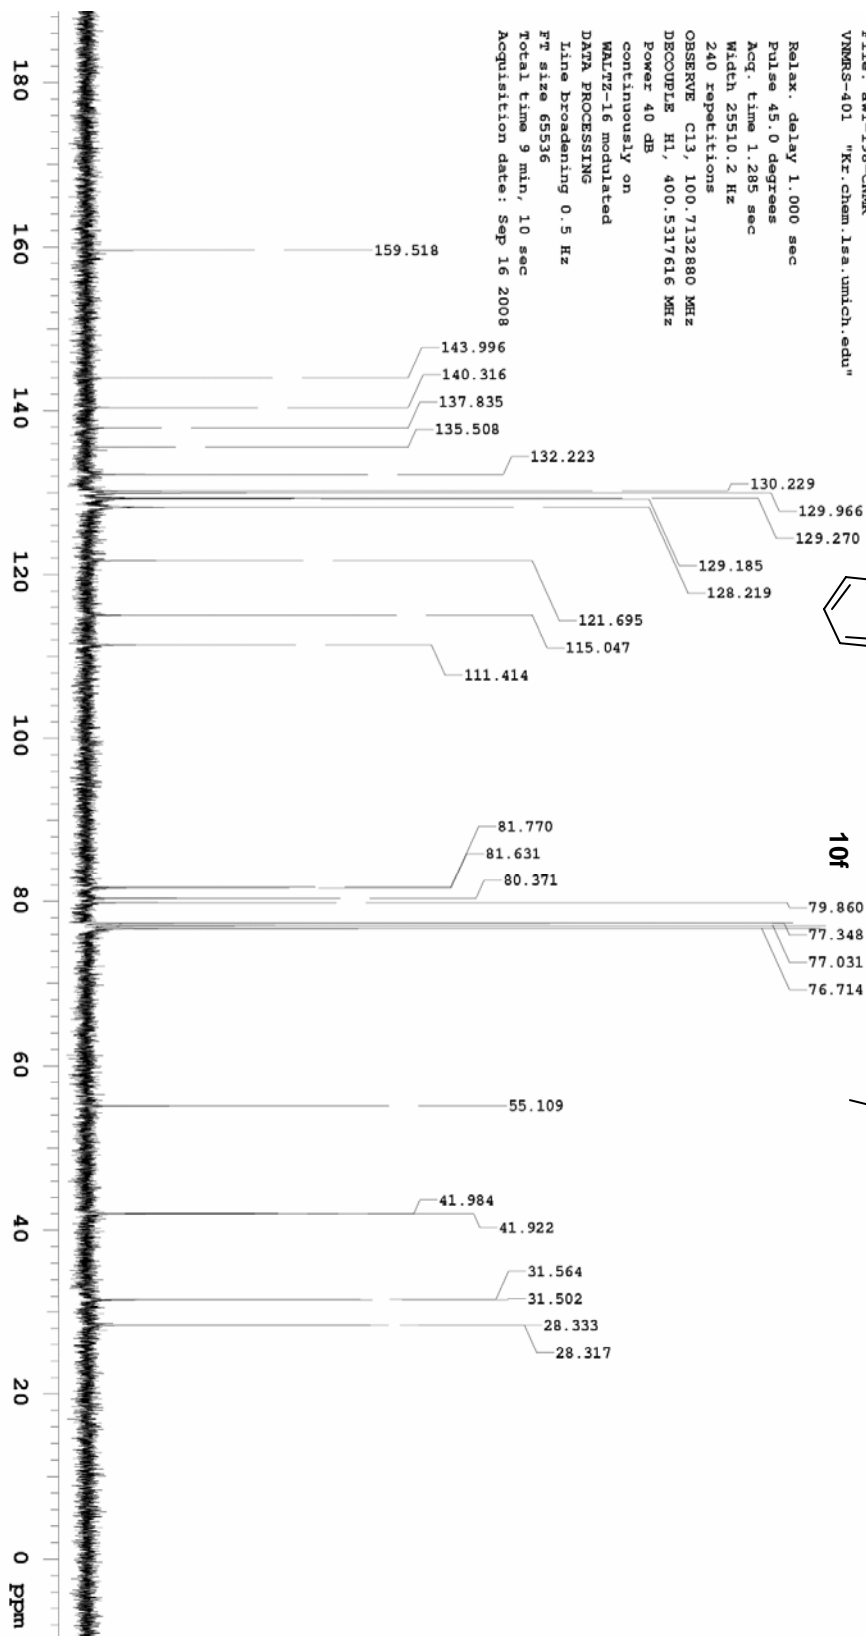

## STANDARD PROTON PARAMETERS

File: aw1-200-HMR

Pulse Sequence: szpul

Solvent: cdcl3

Ambient temperature

Operator: amanfran

File: aw1-200-HMR

VNMR-401 "Kr.Chem.1sa.umich.edu"

Relax. delay 1.000 sec

Pulse 45.0 degrees

Acq. time 2.556 sec

Width 6410.3 Hz

8 repetitions

OBSERVE H1, 400.5297589 MHz

DATA PROCESSING

FT size 32768

Total time 0 min, 35 sec

Acquisition date: Sep 19 2008

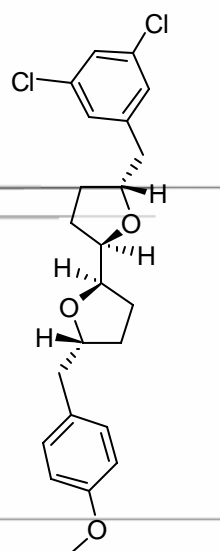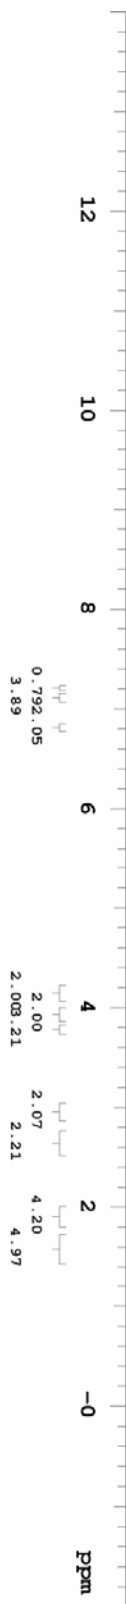

## STANDARD PROTON PARAMETERS

File: aw1-200-CNMR  
 Pulse Sequence: szpul  
 Solvent: cdcl3  
 Ambient temperature  
 Operator: amanfran  
 File: aw1-200-CNMR  
 VNMRS-401 "Kr.Chem.1sa.umich.edu"

Relax. delay 1.000 sec  
 Pulse 45.0 degrees  
 Acq. time 1.285 sec  
 Width 25510.2 Hz  
 256 repetitions  
 OBSERVE C13, 100.7132880 MHz  
 DECOUPLE H1, 400.5317616 MHz  
 Power 40 dB  
 continuously on  
 WALTZ-16 modulated  
 DATA PROCESSING  
 Line broadening 0.5 Hz  
 FT size 65536  
 Total time 9 min, 47 sec  
 Acquisition date: Sep 19 2008

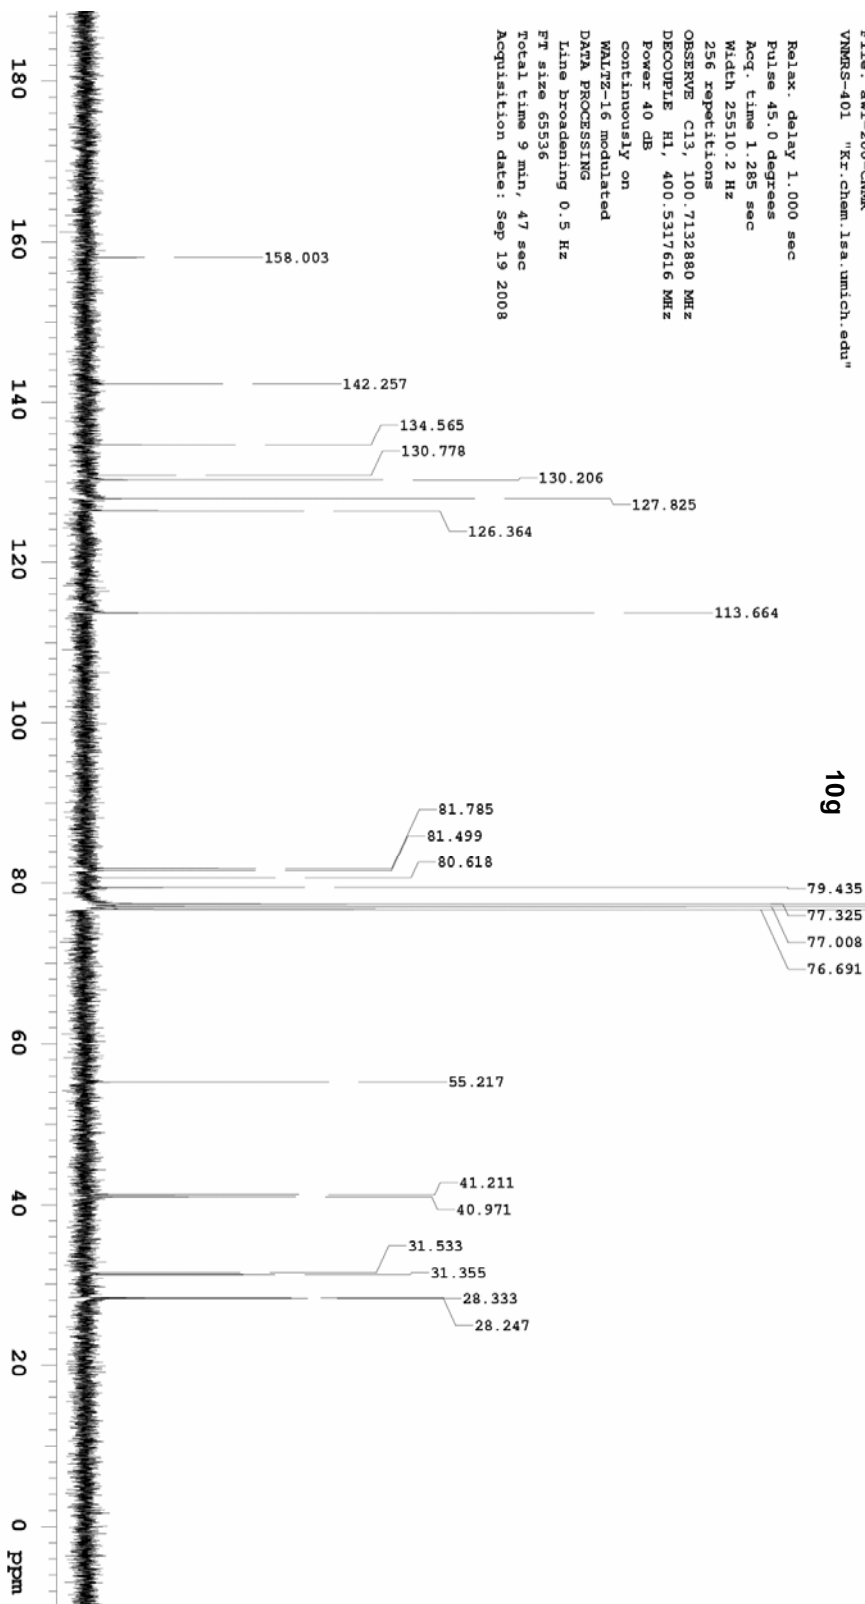

Std proton

File: aw1-206

Pulse Sequence: s2purl

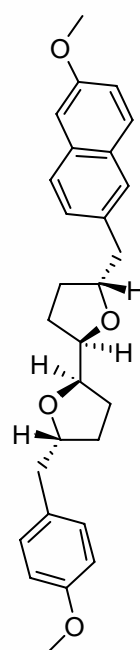

10h

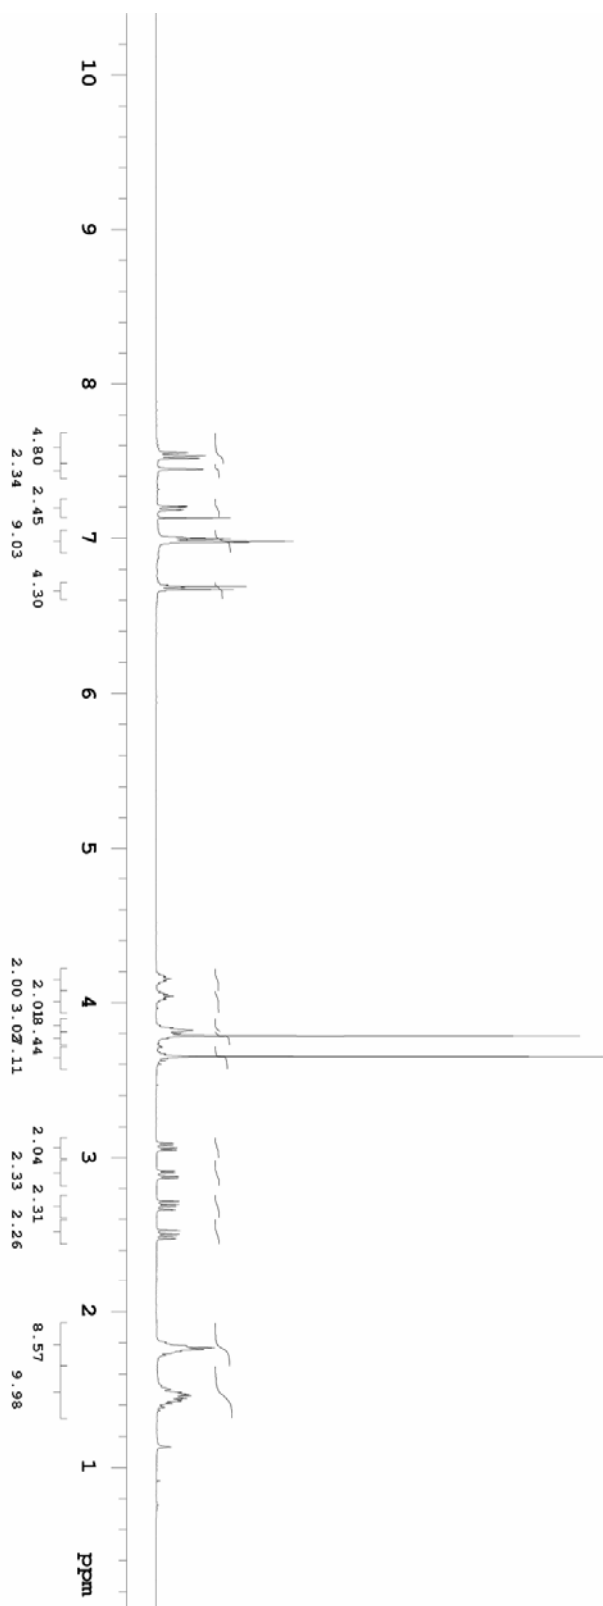

Std Carbon

File: awl-206-CNMR-1  
 Pulse Sequence: s2pul  
 Solvent: c6d6  
 Ambient Temperature  
 Operator: amanfran  
 File: awl-206-CNMR-1  
 INOVA-400 "Kr.chem.lsa.umich.edu"

Relax. delay 0.100 sec  
 Pulse 30.0 degrees  
 Acq. time 1.300 sec  
 Width 24140.0 Hz  
 304 repetitions  
 OBSERVE C13, 100.5712794 MHz  
 DECOUPLE H1, 399.9670004 MHz  
 Power 39 dB  
 continuously on  
 WALTZ-16 modulated  
 DATA PROCESSING  
 Line broadening 0.8 Hz  
 FT size 65536  
 Total time 7 min, 8 sec  
 Acquisition date: Sep 29 2008

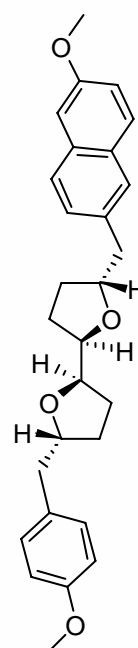

10h

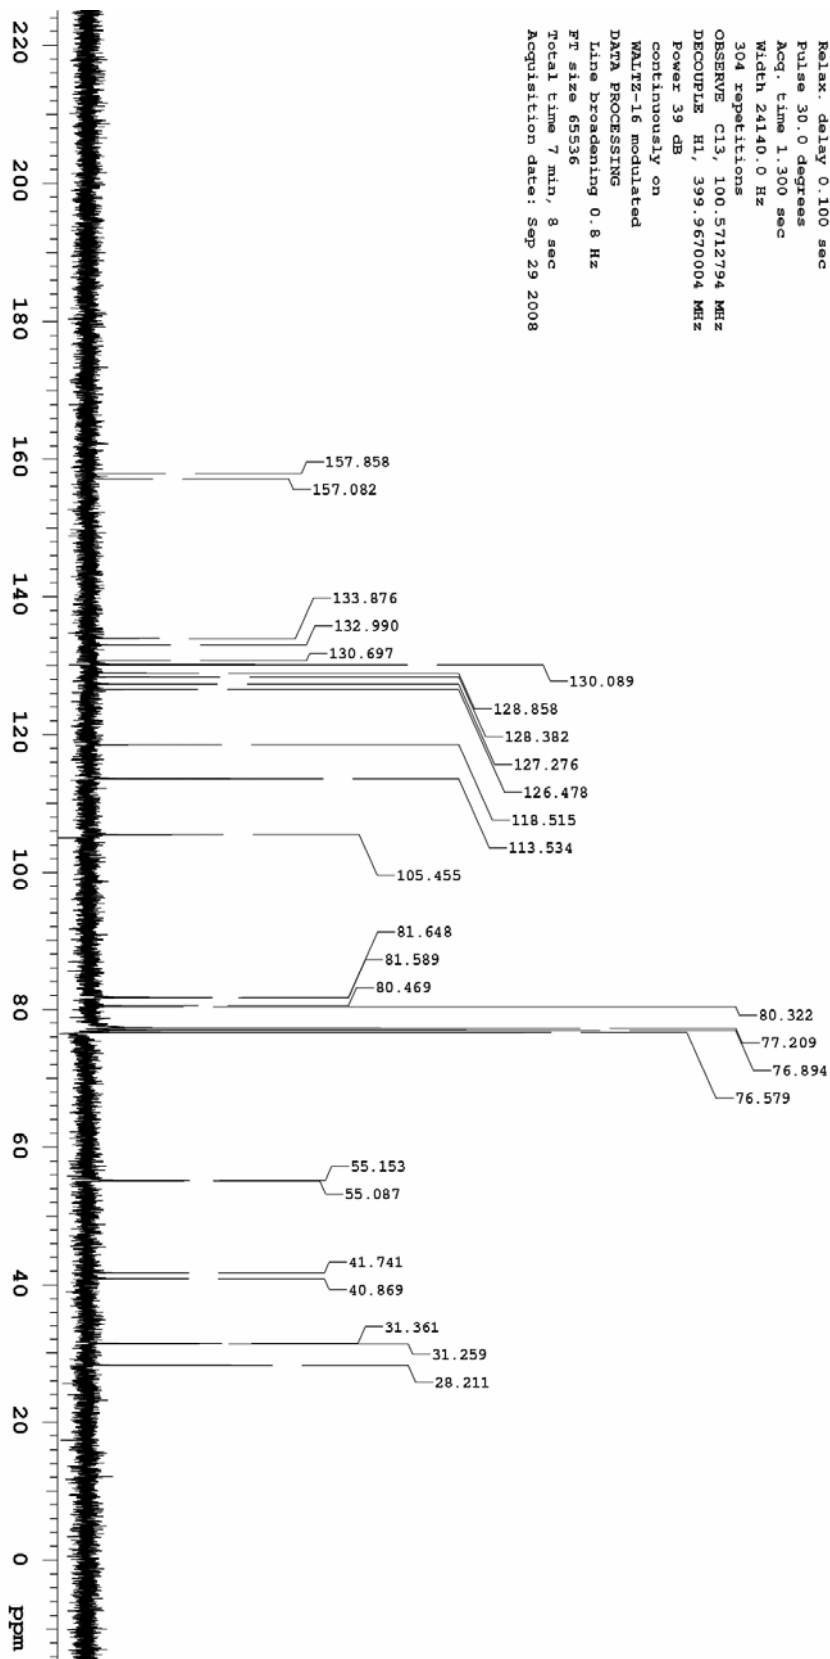

## STANDARD PROTON PARAMETERS

File: aw2-36

Pulse Sequence: szpul

Solvent: cdcl3

Ambient temperature

Operator: amanfran

File: aw2-36

VNMR-400 "Kr.Chem.1sa.umich.edu"

Relax. delay 1.000 sec

Pulse 45.0 degrees

Acq. time 2.556 sec

Width 6410.3 Hz

8 repetitions

OBSERVE H1, 399.5389463 MHz

DATA PROCESSING

FT size 32768

Total time 0 min, 35 sec

Acquisition date: Dec 29 2008

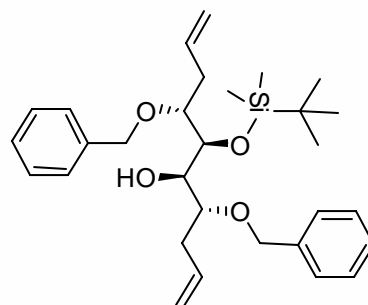

19

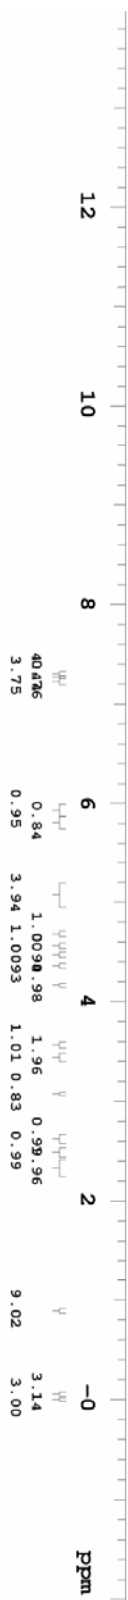

## STANDARD PROTON PARAMETERS

File: aw2-36-CNMR  
 Pulse Sequence: s2pul  
 Solvent: cdcl3  
 Ambient temperature  
 Operator: amanfran  
 File: aw2-36-CNMR  
 VNMR5-400 "Xr:chem.lsa.umich.edu"

Relax. delay 1.000 sec  
 Pulse 45.0 degrees  
 Acq. time 1.285 sec  
 Width 25510.2 Hz  
 192 repetitions  
 OBSERVE C13, 100.641428 MHz  
 DECOUPLE H1, 399.5409236 MHz  
 Power 33 dB  
 continuously on  
 WALTZ-16 modulated  
 DATA PROCESSING  
 Line broadening 0.5 Hz  
 FT size 65536  
 Total time 7 min, 20 sec  
 Acquisition date: Dec 29 2008

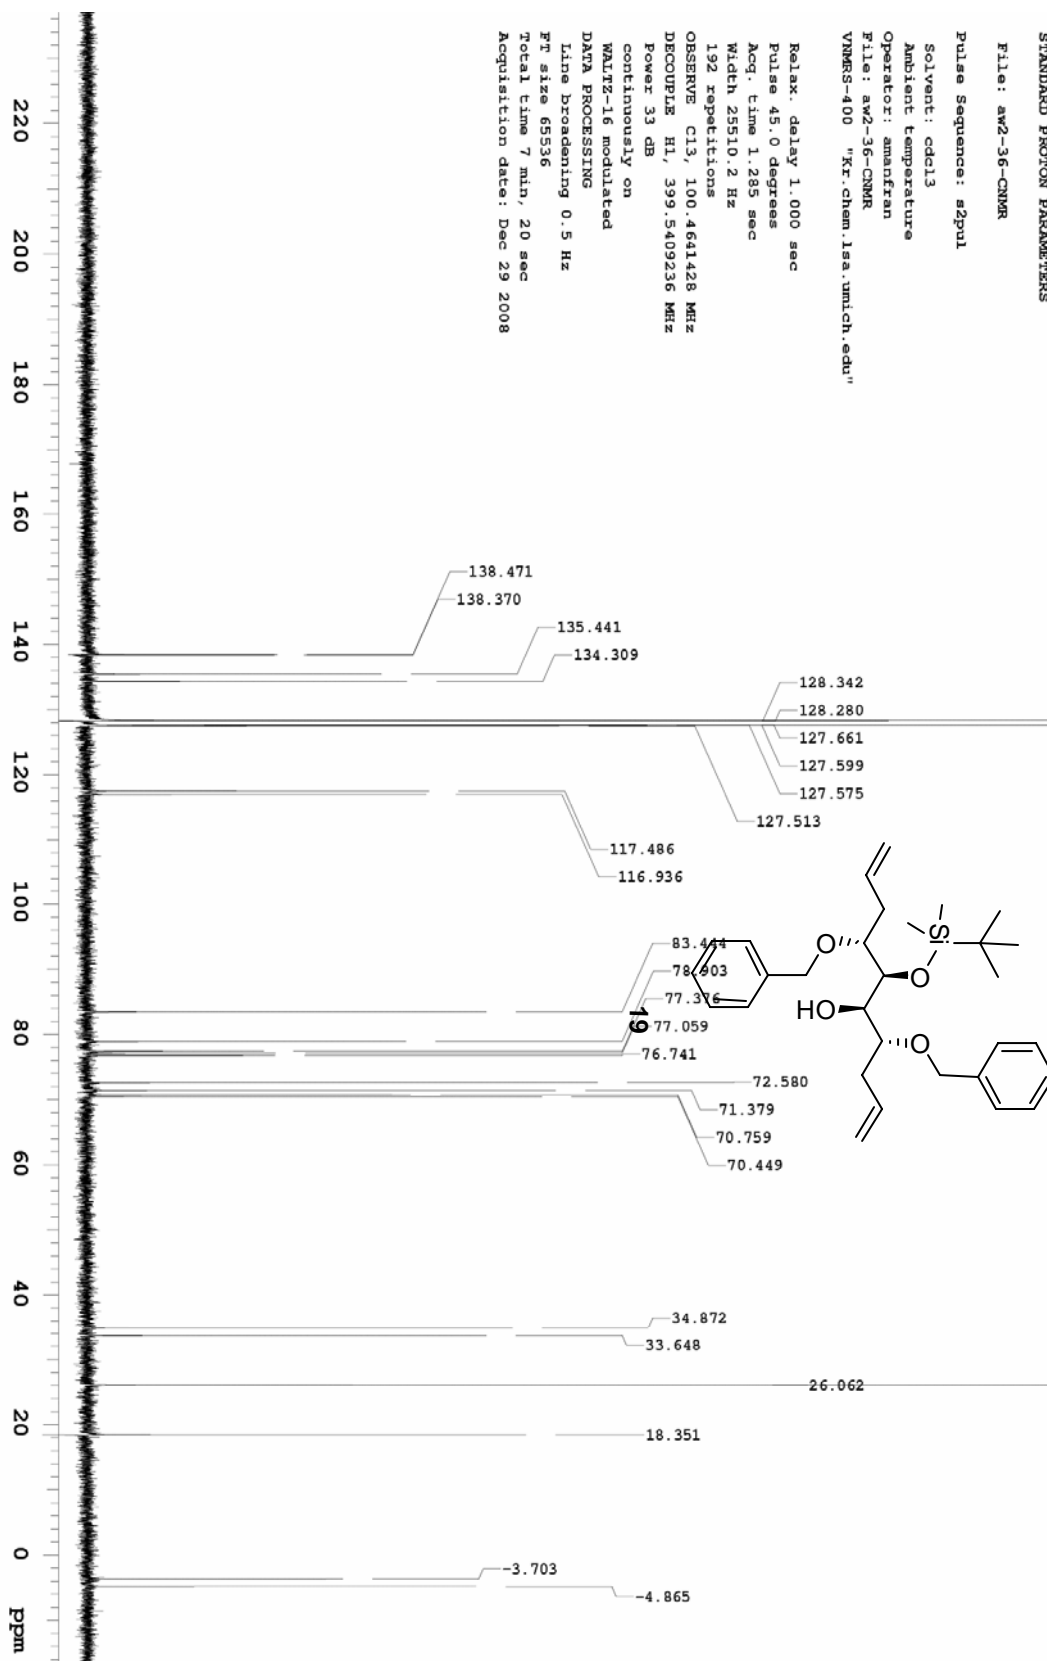

## STANDARD PROTON PARAMETERS

File: aw2-38-HNMR  
 Pulse Sequence: szpul  
 Solvent: cdcl3  
 Ambient temperature  
 Operator: amanfran  
 File: aw2-38-HNMR  
 VNMR5-400 "Kr.Chem.1sa.umich.edu"

Relax. delay 1.000 sec  
 Pulse 45.0 degrees  
 Acq. time 2.556 sec  
 Width 6410.3 Hz  
 8 repetitions  
 OBSERVE H1, 399.5389063 MHz  
 DATA PROCESSING  
 FT size 32768  
 Total time 0 min, 35 sec  
 Acquisition date: Dec 31 2008

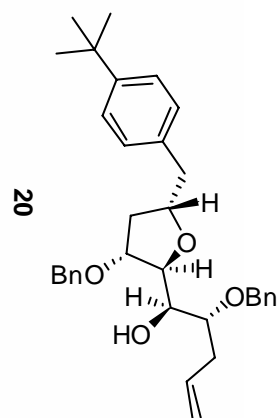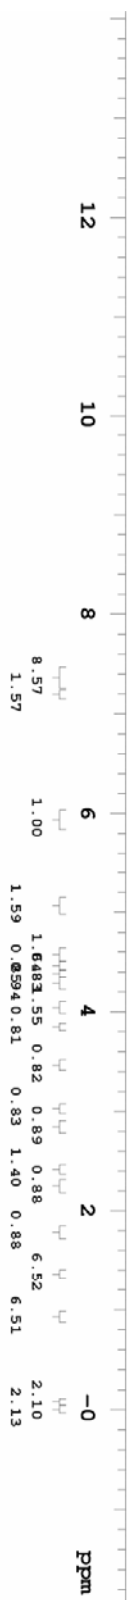



Std. Carbon

File: aw2-38-CNMR  
 Pulse Sequence: szpul  
 Solvent: cdcl3  
 Temp: 23.0 C / 296.1 K  
 Operator: amanfran  
 File: aw2-38-CNMR  
 INOVA-400 "Kr.chem.1sa.umtch.edu"

Relax. delay 0.100 sec  
 Pulse 30.0 degrees  
 Acq. time 1.300 sec  
 Width 24140.0 Hz  
 208 repetitions  
 OBSERVE C13, 100.5712703 MHz  
 DECOUPLE H1, 399.9669644 MHz  
 Power 39 dB  
 continuously on  
 WALTZ-16 modulated  
 DATA PROCESSING  
 Line broadening 0.8 Hz  
 PR size 65536  
 Total time 4 min, 53 sec  
 Acquisition date: Dec 31 2008

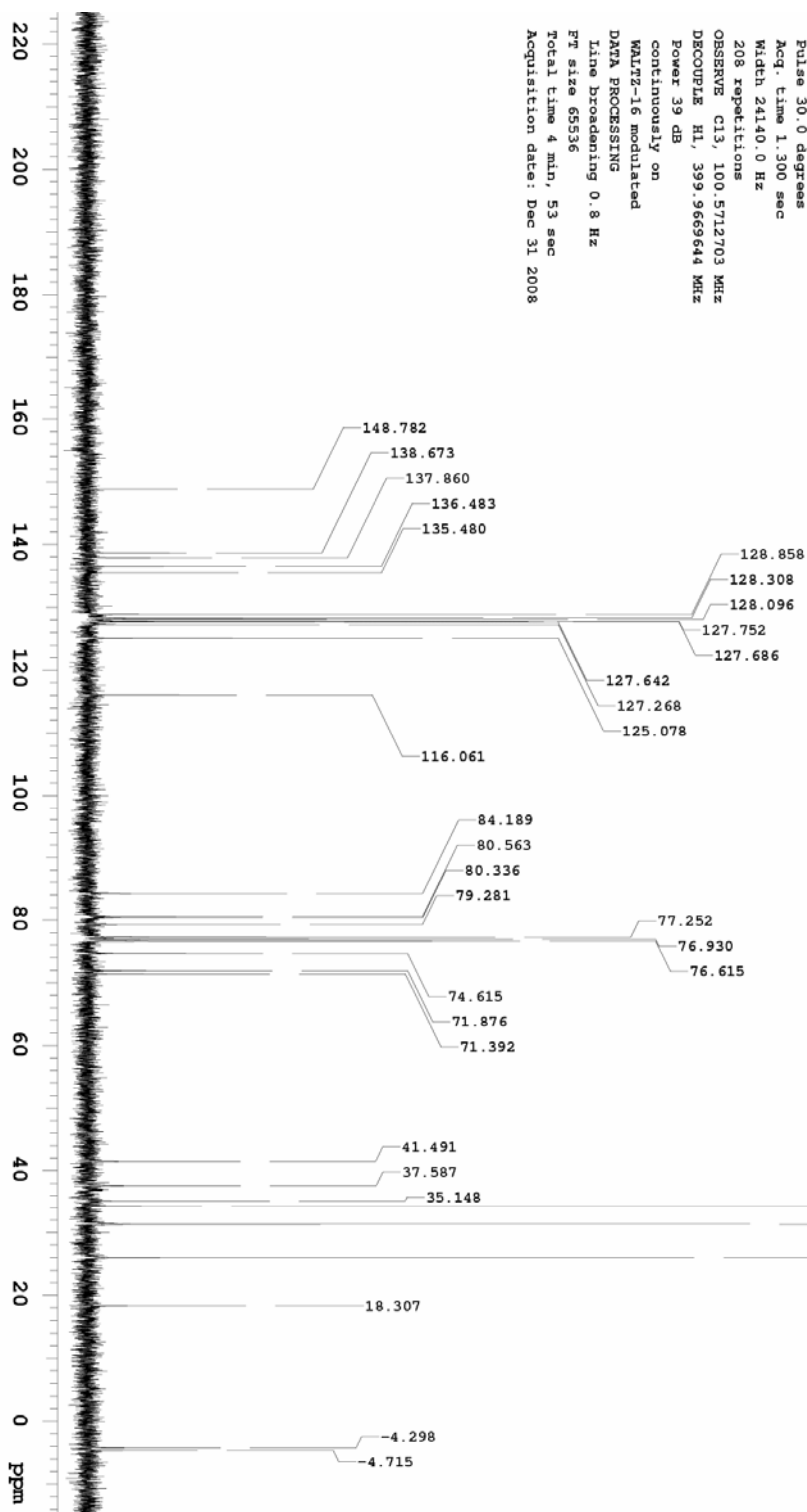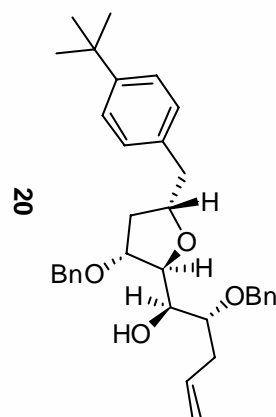

STANDARD 1H OBSERVE - profile

File: misc/gallium/amanfran/vnmr/sy/data/aw2-46-noesy.fid

Pulse Sequence: NOESY

Solvent: cdcl3  
Temp: 20.0-C-/293.1-K  
Operator: amanfran  
File: aw2-46-noesy  
VNMRS-400 "Dy.Chem.LSA,UMich.Edu"

Relax. delay 1.000 sec  
Acq. time 0.150 sec  
Width 3491.6 Hz  
2D Width 3491.6 Hz  
4 repetitions  
2 x 128 increments  
OBSERVE H1, 399.5389087 MHz  
DATA PROCESSING  
Gauss apodization 0.068 sec  
FI DATA PROCESSING  
Gauss apodization 0.034 sec  
FT size 1024 x 1024  
Total time 20 min, 51 sec  
Acquisition date: Jan 20 2009

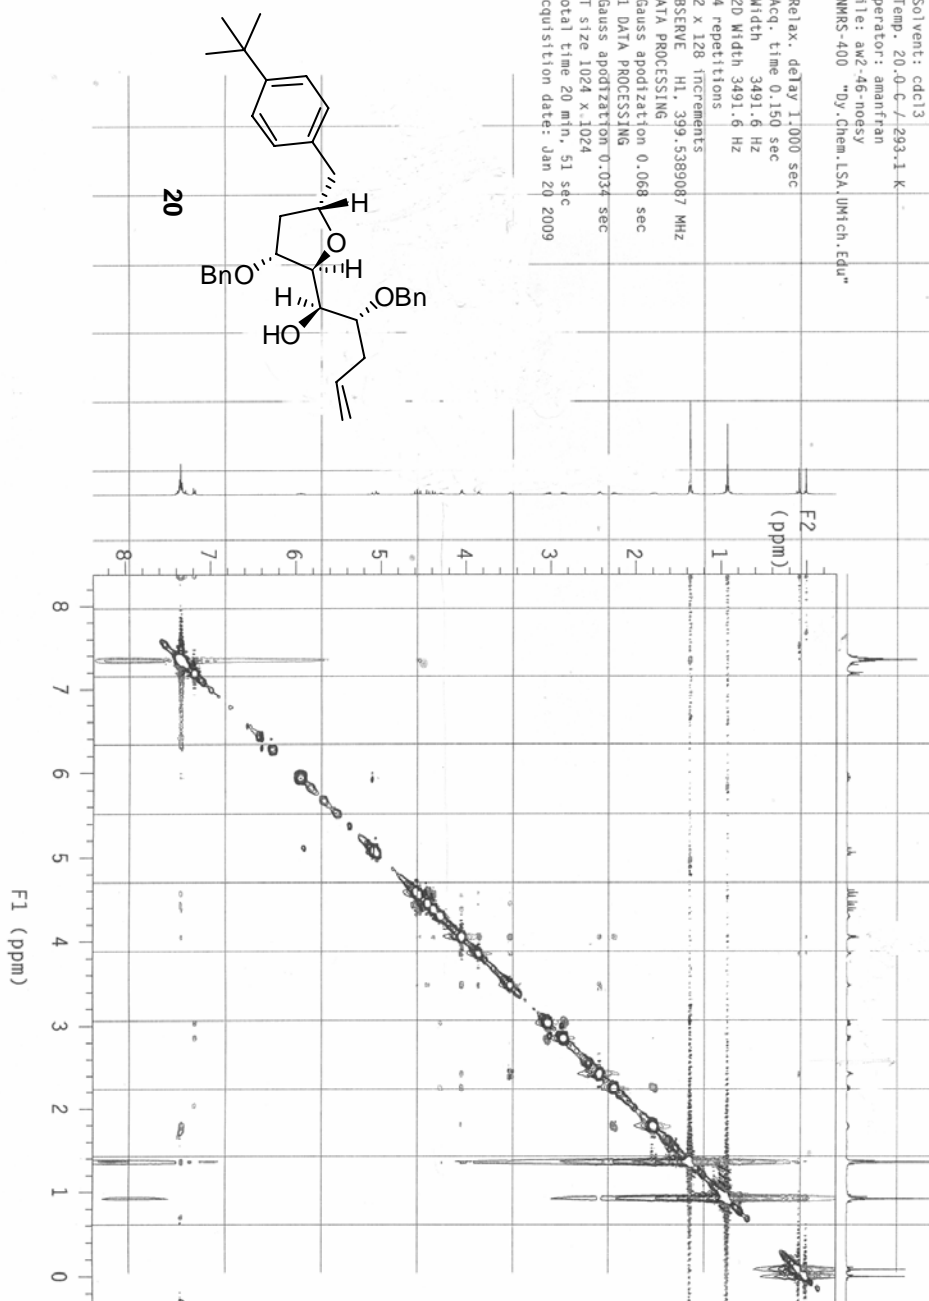

STANDARD 1H OBSERVE - profile

File: aw2-46-2-cosy

Pulse Sequence: gCOSY

Solvent: cdcl3

Temp. 20.0 C / 293.1 K

Operator: amanfran

File: aw2-46-2-cosy

VNMRS-400 "Kr.chem.1@sa.umich.edu"

Relax. delay 1.000 sec

Acq. time 0.150 sec

Width 3491.6 Hz

2D Width 3491.6 Hz

Single scan

128 increments

OBSERVE H1, 399.5389087 MHz

DATA PROCESSING

Sd. sine bell1 0.073 sec

F1 DATA PROCESSING

Sd. sine bell1 0.037 sec

FT size 1024 x 1024

Total time 3 min., 12 sec

Acquisition date: Jan 20 2009

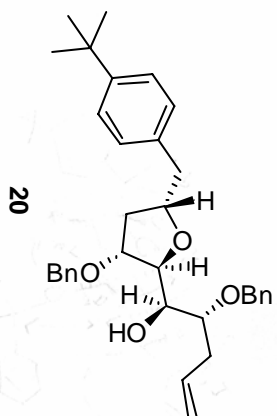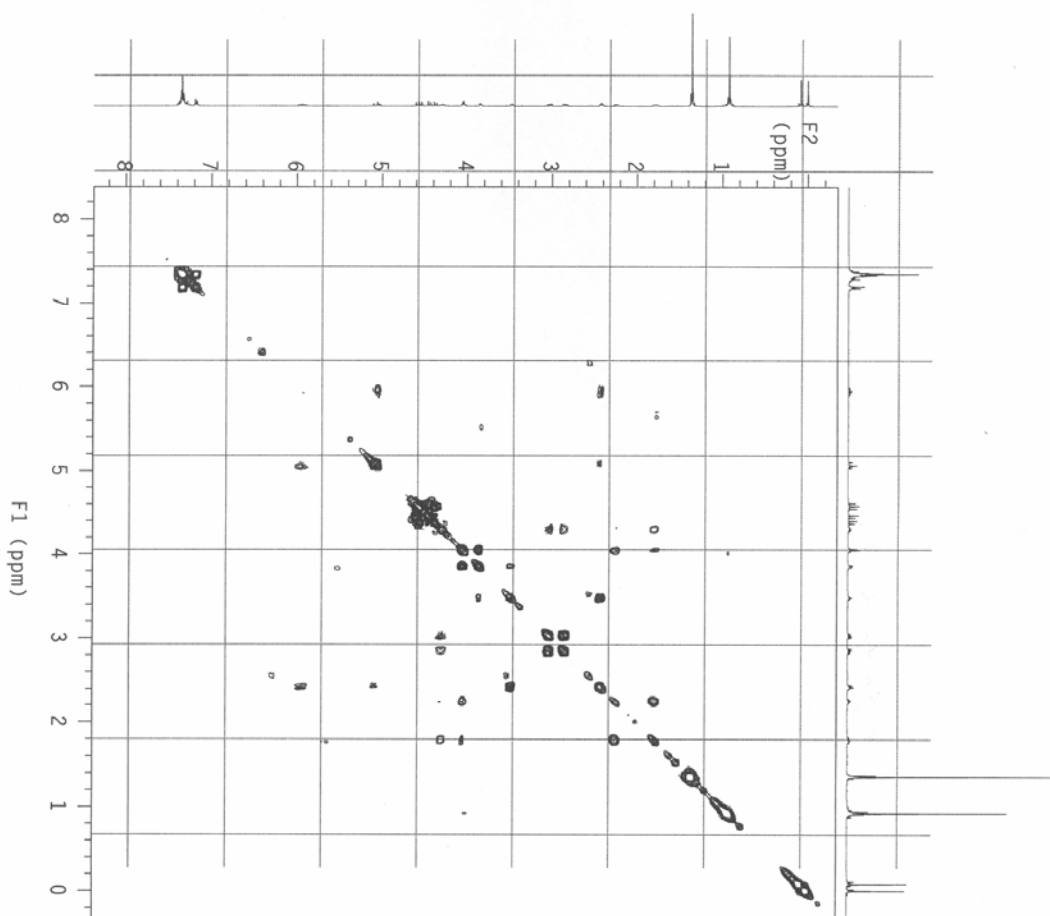

Std proton

File: aw2-39-2-1HMR  
 Pulse Sequence: s2pul  
 Solvent: cdcl3  
 Ambient Temperature  
 Operator: amnfran  
 File: aw2-39-2-1HMR  
 INOVA-400 "K.chem.lsa.umich.edu"  
 Relax. delay 0.500 sec  
 Pulse 45.0 degrees  
 Acq. time 3.000 sec  
 Width 6399.5 Hz  
 16 repetitions  
 OBSERVE H1, 399.9649645 MHz  
 DATA PROCESSING  
 Line broadening 0.2 Hz  
 FT size 65536  
 Total time 1 min, 3 sec  
 Acquisition date: Jan 3 2009

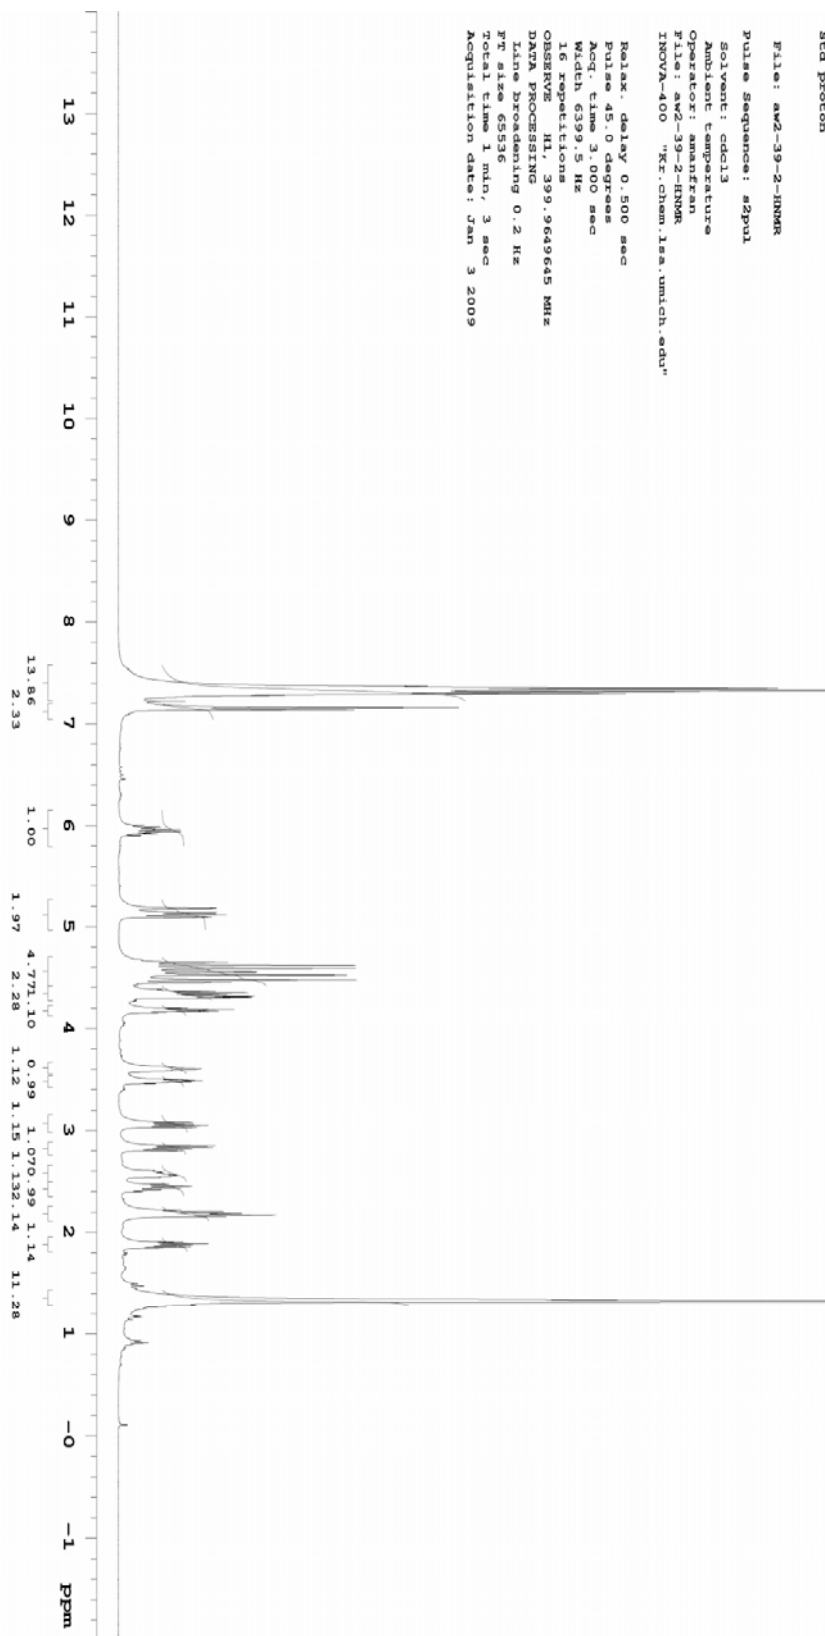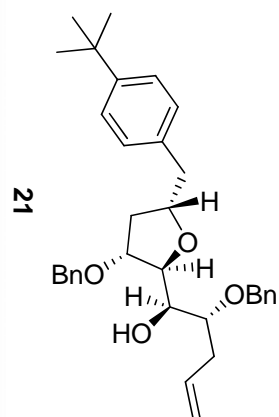

## Std Carbon

File: aw2-39-2-CNMR  
 Pulse Sequence: s2pul  
 Solvent: cdcl3  
 Ambient Temperature  
 Operator: amnfrkn  
 File: aw2-39-2-CNMR  
 INOVA-400 "Kf.Chem.lsa.umich.edu"  
 Relax. delay 0.100 sec  
 Pulse 30.0 degrees  
 Acq. time 1.300 sec  
 Width 24140.0 Hz  
 128 repetitions  
 OBSERVE C13, 100.5712703 MHz  
 DECOUPLE H1, 399.969644 MHz  
 Power 39 dB  
 continuously on  
 WALTZ-16 modulated  
 DATA PROCESSING  
 Line broadening 0.8 Hz  
 FT size 65536  
 Total time 3 min, 0 sec  
 Acquisition date: Jan 3 2009

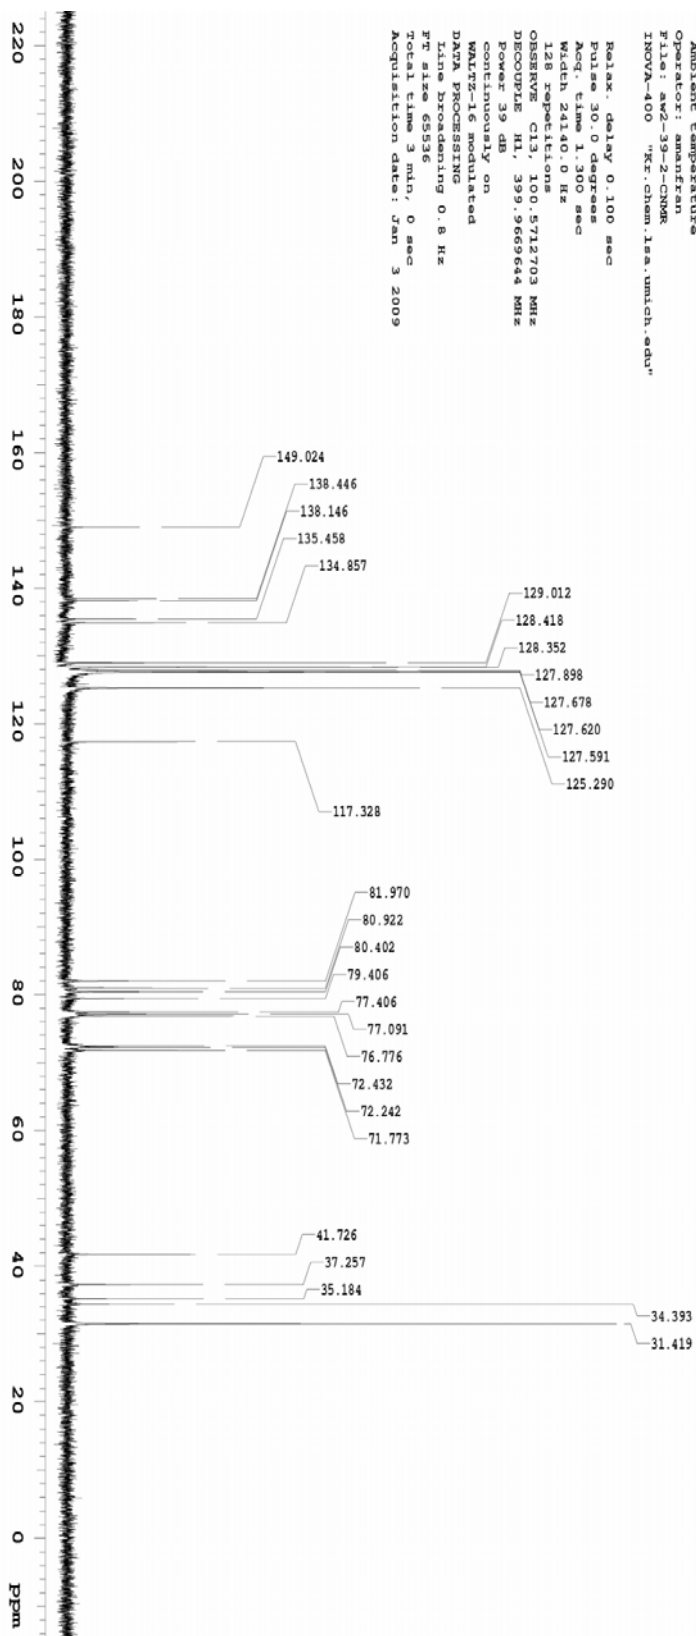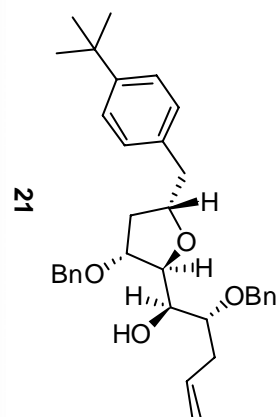

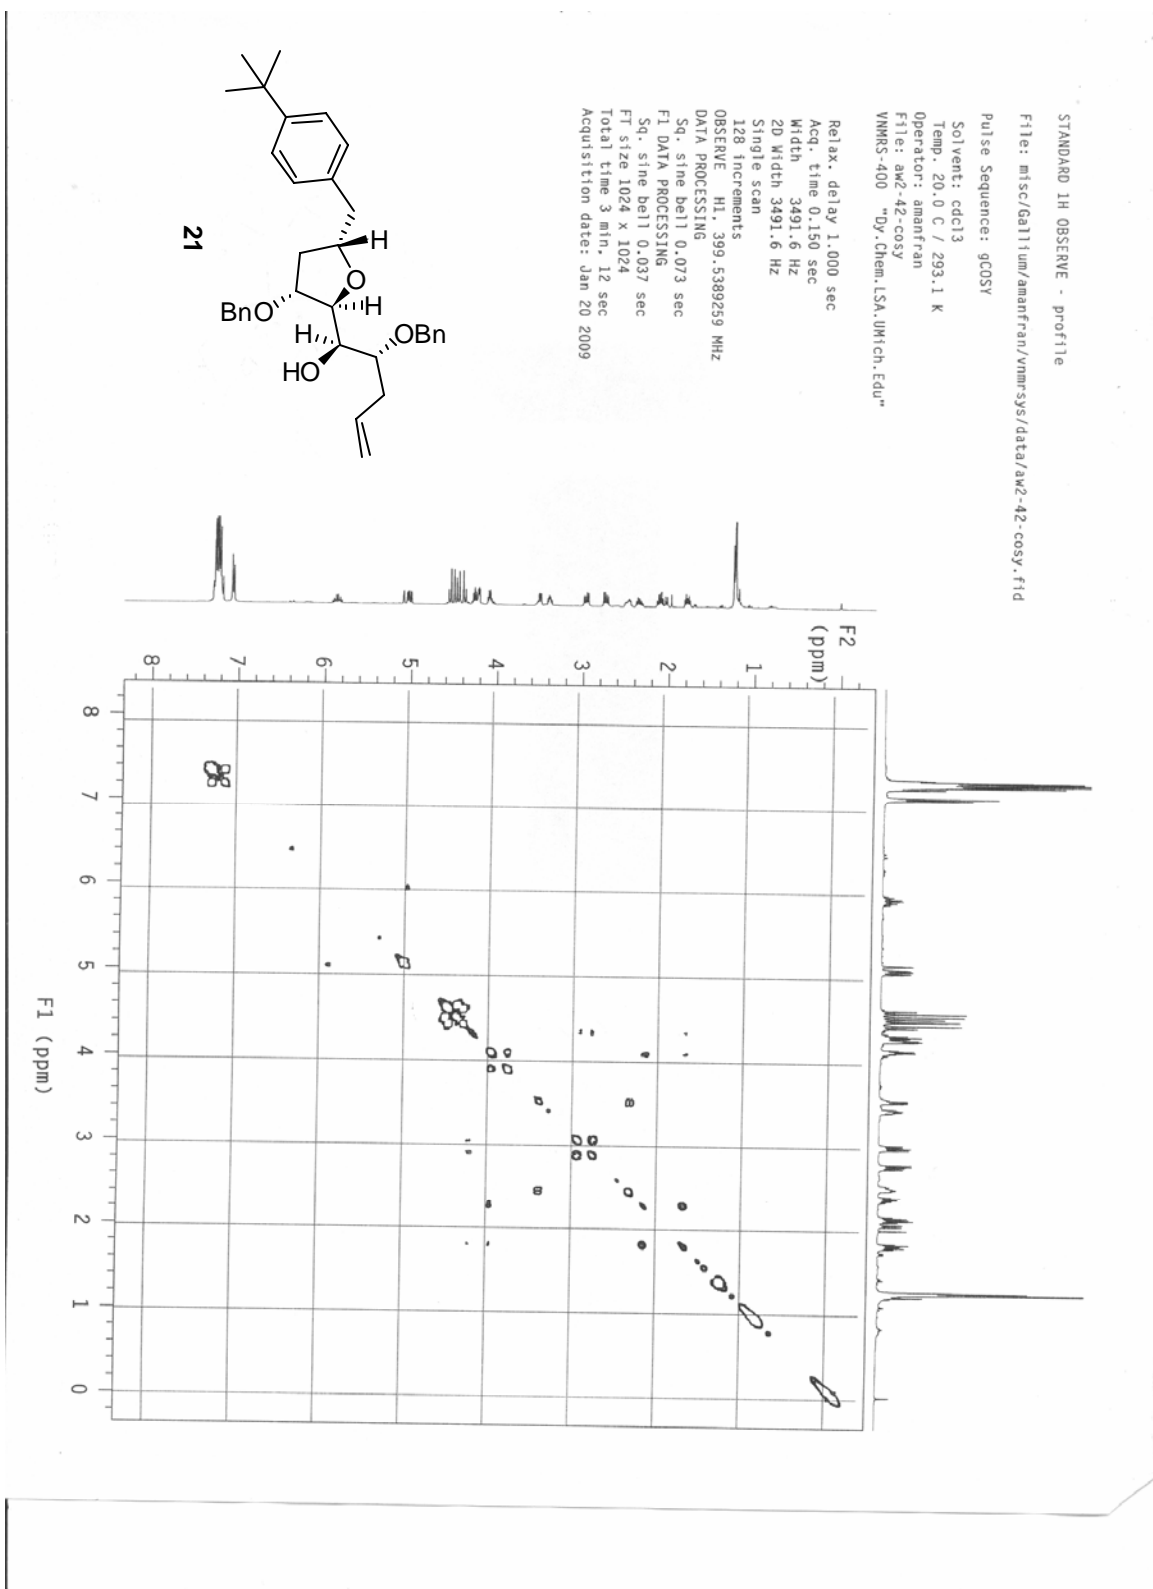

STANDARD 1H OBSERVE - profile

File: misc/ballium/amanfran/vnmrSYS/data/aw2-47-2-nosey.fid

Pulse Sequence: NOESY

Solvent: cdcl3  
Temp: 20.0 C / 293.1 K  
Operator: amanfran  
File: aw2-47-2-nosey  
VNMRS-400 "Dy.Chem.LSA.UMich.Edu"

Relax. delay: 1.000 sec  
Acq. time 0.150 sec  
Width 3491.6 Hz  
2D Width 3491.6 Hz  
4 repetitions  
2 x 128 increments  
OBSERVE H1, 399.5389259 MHz  
DATA PROCESSING  
Gauss apodization 0.068 sec  
F1 DATA PROCESSING  
Gauss apodization 0.034 sec  
FT size 1024 x 1024  
Total time 20 min, 51 sec  
Acquisition date: Jan 21 2009

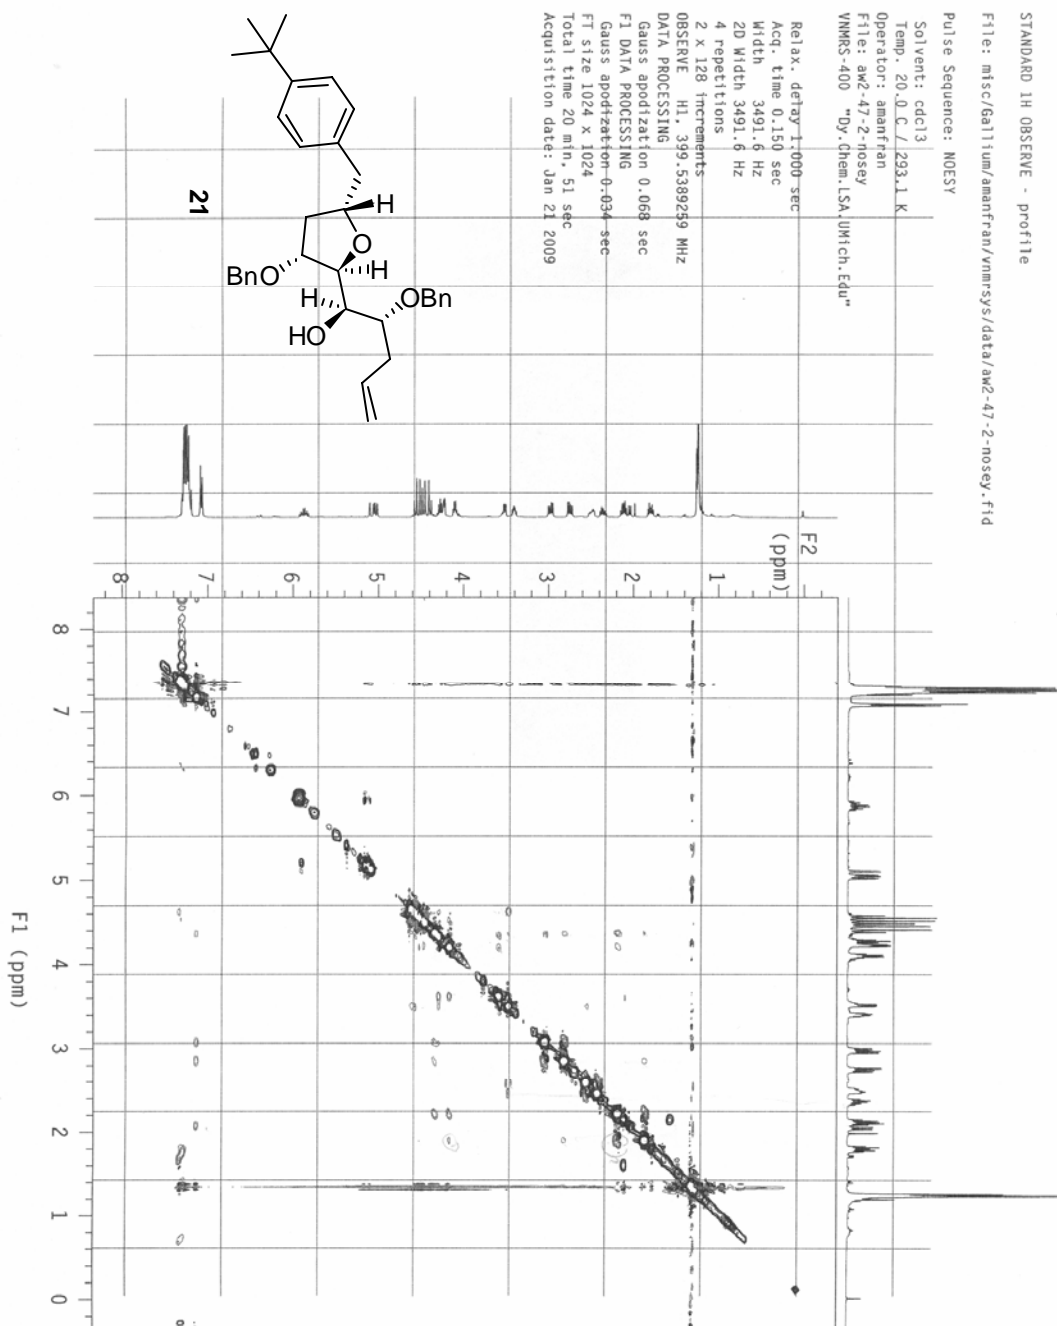

Std proton

File: misc/i400/amanfran/vmr/sys/data/aw2-42-propanol.tid

Pulse Sequence: s2pul

Temp. 25.0 C / 298.1 K

Operator: amanfran

File: aw2-42-propanol

INOVA-400 "Dy. Chem. ISA, UMich. Edu"

22

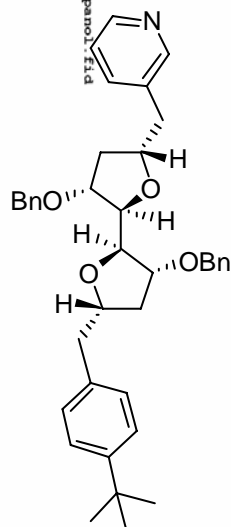

Relax. delay 0.500 sec  
 pulse 45.0 degrees  
 Acq. time 3.000 sec  
 Width 6399.5 Hz  
 16 repetitions  
 OBSERVE H1, 399.9658604 MHz  
 DATA PROCESSING  
 Line broadening 0.2 Hz  
 FT size 65536  
 Total time 1 min, 3 sec  
 Acquisition date: Jan 7 2009

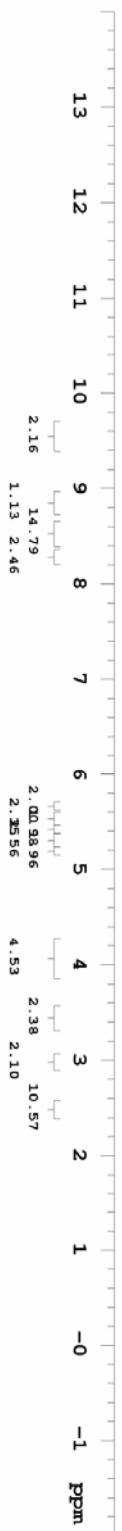



Std Carbon

File: aw2-42-CNMNR  
 Pulse Sequence: s2pul  
 Solvent: cdcl3  
 Temp: 23.0 C / 296.1 K  
 Operator: amanfran  
 File: aw2-42-CNMNR  
 INOVA-400 "Kz.chem.lsa.umich.edu"

Relax. delay 0.100 sec  
 Pulse 30.0 degrees  
 Acq. time 1.300 sec  
 Width 24140.0 Hz  
 208 repetitions  
 OBSERVE C13, 100.5712703 MHz  
 DECOUPLE H1, 399.9669644 MHz  
 Power 39 dB  
 continuously on  
 WALTZ-16 modulated  
 DATA PROCESSING  
 Line broadening 0.8 Hz  
 FT size 65536  
 Total time 4 min, 53 sec  
 Acquisition date: Jan 6 2009

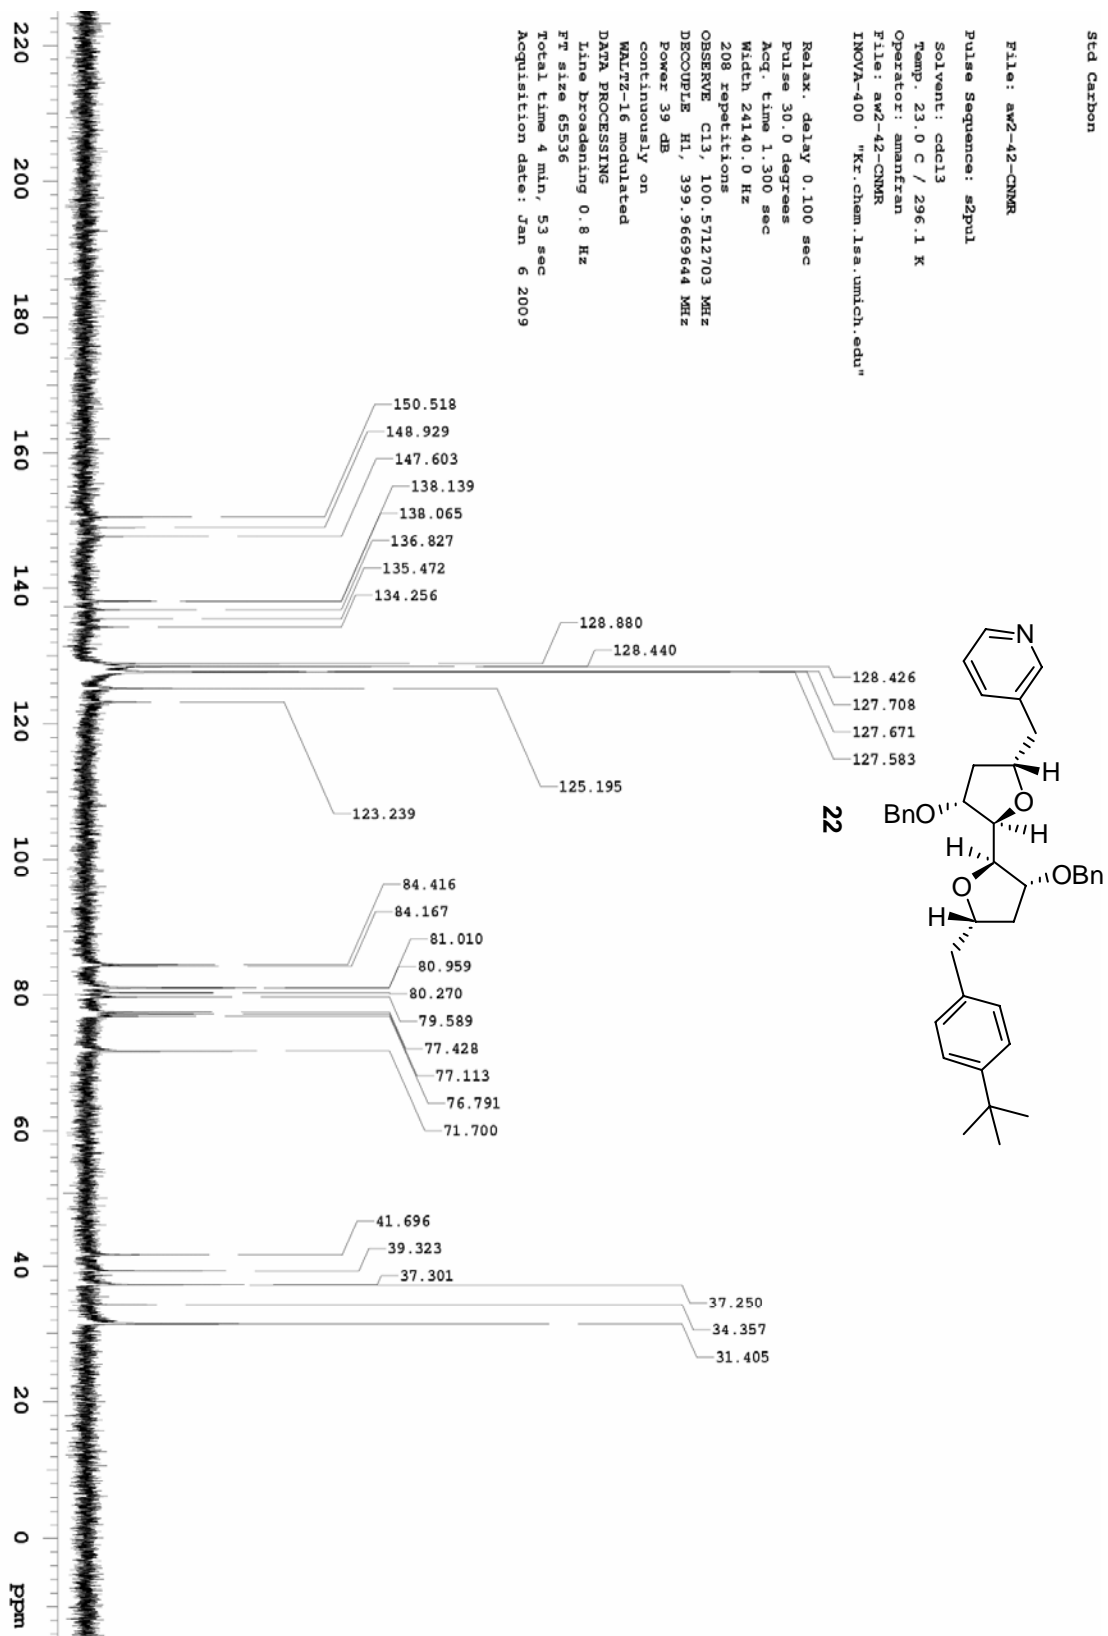

Std proton

File: aw2-42-prop-nosy

Pulse Sequence: NOESY

Solvent: toluene  
 Ambient temperature  
 Operator: amanfran  
 File: aw2-42-prop-nosy  
 INOVA-400 "Kr.chem,1sa.umich.edu"

Relax. delay 1.000 sec  
 Mixing 0.300 sec  
 Acq. time 0.158 sec  
 Width 3234.3 Hz  
 2D Width 3234.3 Hz  
 4 repetitions  
 2 x 128 increments  
 OBSERVE H1, 399.9658025 MHz  
 DATA PROCESSING  
 Gauss apodization 0.073 sec  
 F1 DATA PROCESSING  
 Gauss apodization 0.073 sec  
 FT size 2048 x 2048  
 Total time 26 min, 18 sec  
 Acquisition date: Jan 7 2009  
 Solvent: (CF<sub>3</sub>)<sub>2</sub>CDCl<sub>3</sub>

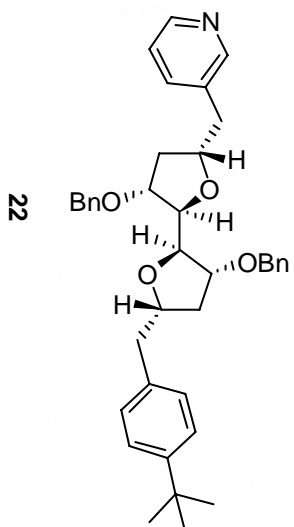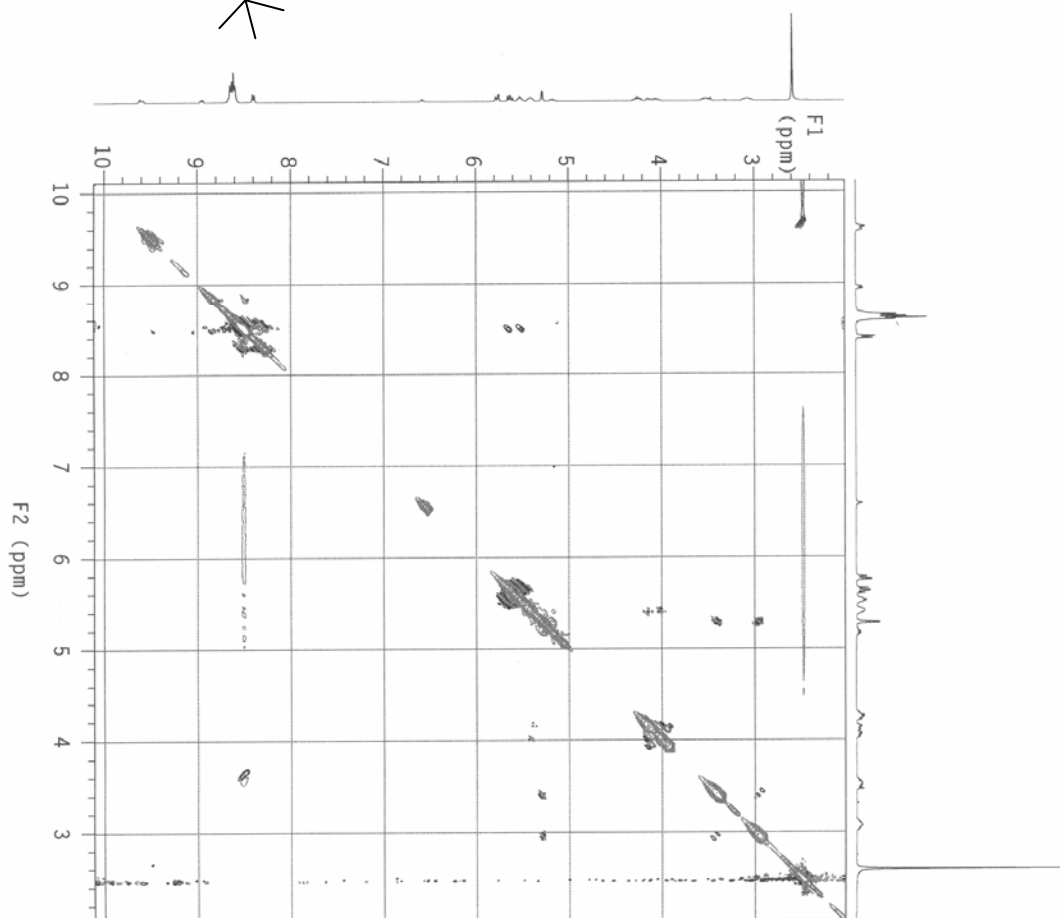

Std proton

File: aw2-40-prop-cosy

Pulse Sequence: COSY

Solvent: toluene

Ambient temperature

Operator: amanfran

File: aw2-40-prop-cosy

INOVA-400 "Kr.chem.lsa.umich.edu"

Relax. delay 1.301 sec

Acq. time 0.158 sec

Width 3234.3 Hz

2D Width 3234.3 Hz

2 repetitions

128 increments

OBSERVE H1, 399.9650245 MHz

DATA PROCESSING

Sine bell 0.079 sec

F1 DATA PROCESSING

Sine bell 0.079 sec

FT size 2048 x 2048

Total time 6 min, 44 sec

Acquisition date: Jan 7 2009

Solvent: (CF<sub>3</sub>)<sub>2</sub>CO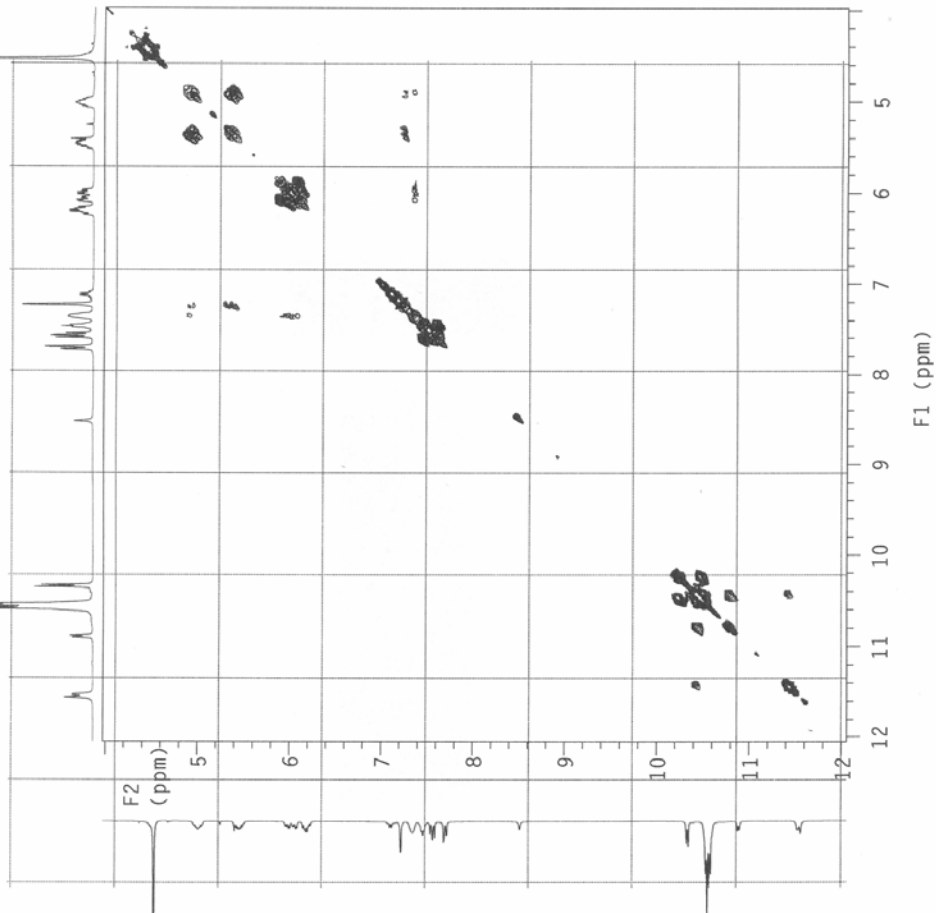**22**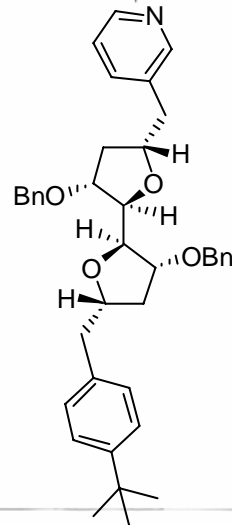

Spd proton

Sample Name:

Data Collected on:  
Zr.Chem.ISM.UMich.edu-inovara400  
Archive directory:

Sample directory:

FIDFile: aw2-7-edc-hnmr

Pulse Sequence: PROTON (s2pul)

Solvent: cdcl3

Data collected on: Mar 11 2009

Temp. 25.0 C / 298.1 K

Operator: amantran

Relax. delay 1.000 sec

Pulse 45.0 degrees

Acq. time 2.560 sec

Width 6399.5 Hz

8 repetitions

OBSERVE M1, 399.9649645 MHz

DATA PROCESSING

FT size 32768

Total time 0 min 29 sec

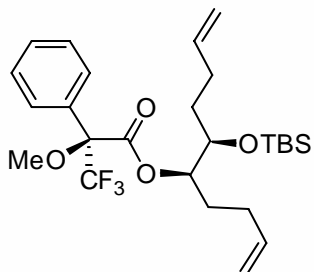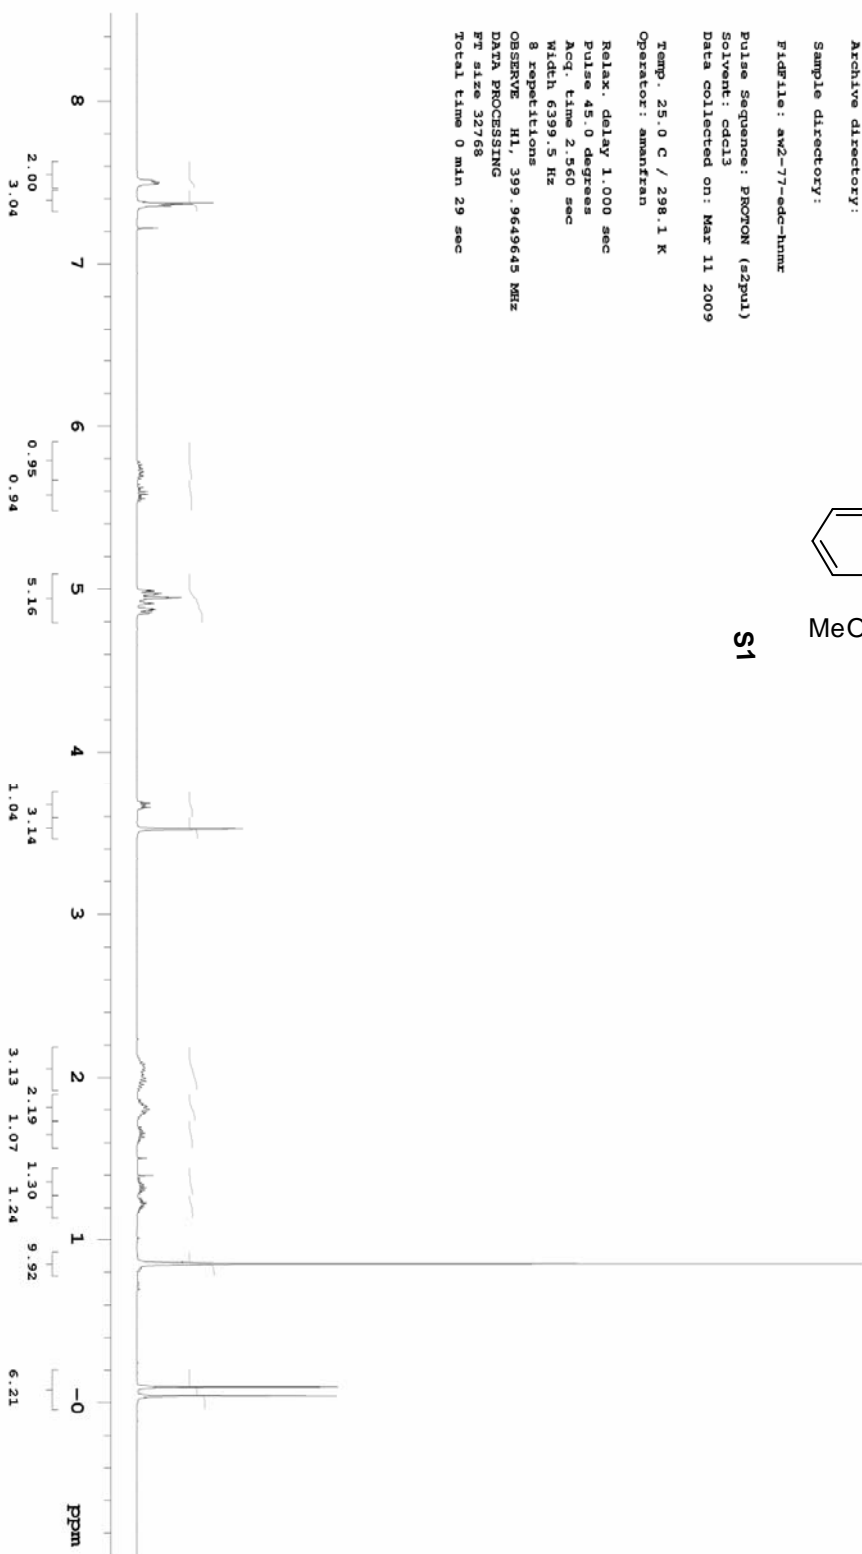

STANDARD 1H OBSERVE - profile  
 Selective band center: 4.29 (ppm); width: 35.1 (Hz)  
 Selective band center: 4.05 (ppm); width: 33.3 (Hz)  
 Selective band center: 3.85 (ppm); width: 18.5 (Hz)  
 Selective band center: 3.48 (ppm); width: 27.7 (Hz)  
 Selective band center: 4.26 (ppm); width: 37.1 (Hz)  
 Selective band center: 4.01 (ppm); width: 27.0 (Hz)  
 Selective band center: 3.81 (ppm); width: 20.3 (Hz)  
 Selective band center: 3.44 (ppm); width: 25.3 (Hz)  
 Selective band center: 2.38 (ppm); width: 25.3 (Hz)  
 Selective band center: 2.21 (ppm); width: 32.1 (Hz)  
 Selective band center: 1.75 (ppm); width: 45.6 (Hz)

Sample Name:

Data Collected on:  
 Ca. Chem. ISA. DMICH. Edu-vmmr2400  
 Archive directory:

Sample directory:

FIDFile: aw2-76--1-CMNR  
 Pulse Sequence: CARBON (s2pul)  
 Solvent: cdcl3  
 Data collected on: Mar 10 2009

Operator: amanfran

Relax. delay: 1.000 sec  
 Pulse: 45.0 degrees  
 Acq. time: 1.285 sec  
 Width: 25510.2 Hz  
 144 repetitions  
 OBSERVE: C13, 100.4641428 MHz  
 DECOUPLE: H1, 399.5409236 MHz  
 Power: 33 dB  
 continuously on  
 WALTZ-16 modulated  
 DATA PROCESSING  
 Line broadening: 0.5 Hz  
 FT size: 65536  
 Total time: 9 min 48 sec

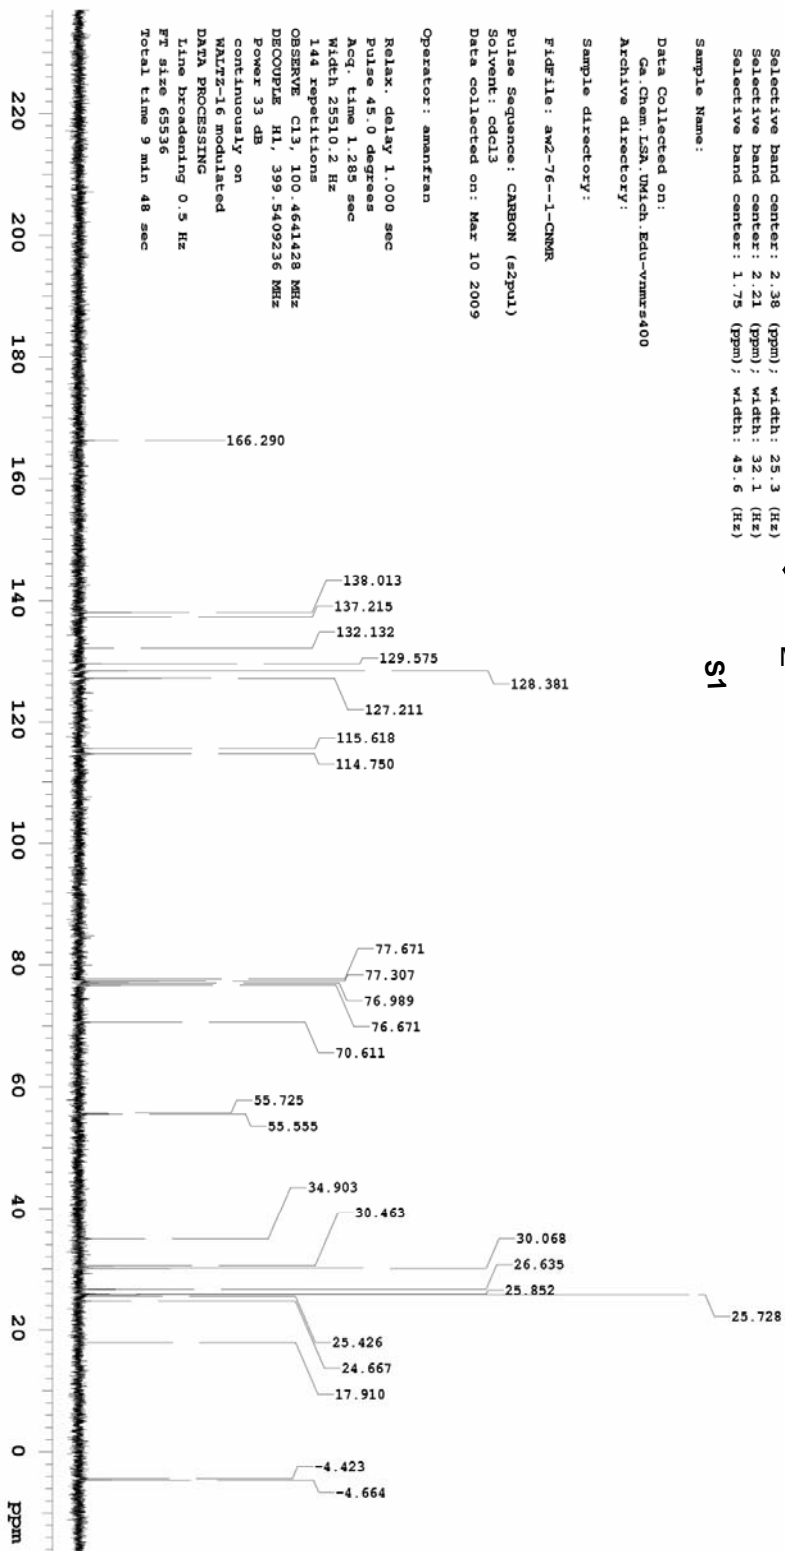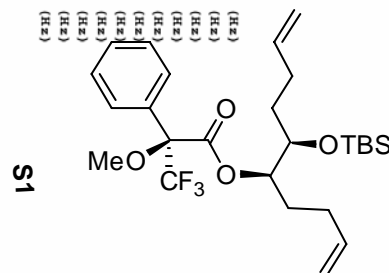

## STANDARD PROTON PARAMETERS

Sample Name:

Data Collected on:  
Zr.Chem.ISA.UMich.edu-Inova400  
Archive directory:

Sample directory:

FidFile: aw2-77-edc-F1-A

Pulse Sequence: FLUORINE (zpu1)

Solvent: cdcl3

Data collected on: Mar 11 2009

Temp. 25.0 C / 298.1 K

Operator: amanfran

Relax. delay 1.000 sec

Pulse 35.0 degrees

Acq. time 0.757 sec

Width 86580.1 Hz

16 repetitions

OBSERVE F19, 376.3430777 MHz

DATA PROCESSING

FT size 131072

Total time 0 min 28 sec

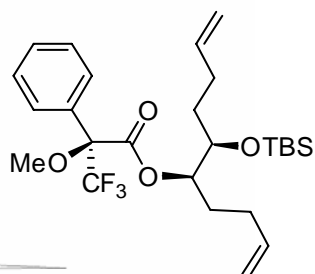

S1

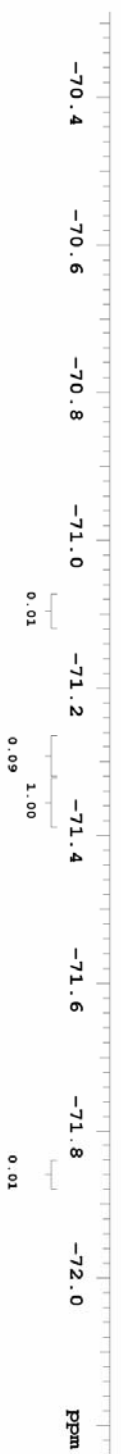

Data:

C:\CLASS-VP\Enterprise\Projects\Default\Data\Ward\Notebook2\aw2-79-dil2-od-li  
pa-1ml.dat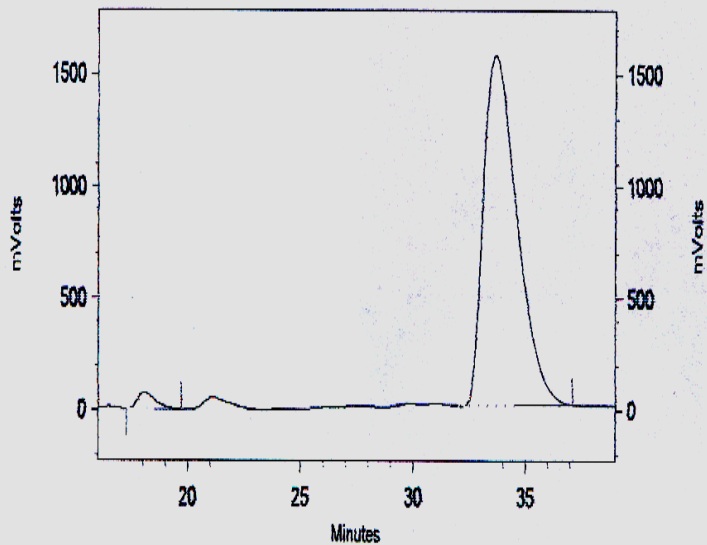

Detector 1 Ch1-231nm

Results

| Retention Time | Area Percent | Area      |
|----------------|--------------|-----------|
| 18.050         | 2.481        | 4159448   |
| 33.658         | 97.519       | 163517691 |

|        |         |           |
|--------|---------|-----------|
| Totals | 100.000 | 167677139 |
|--------|---------|-----------|

Data:  
C:\CLASS-VP\Enterprise\Projects\Default\Data\Ward\Notebook2\aw1-206-dil-1-lip  
a-lml.dat

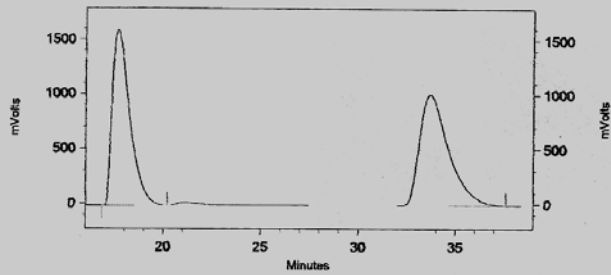

Detector 1 Ch1-231nm  
Results

| Retention Time | Area Percent   | Area             |
|----------------|----------------|------------------|
| 17.650         | 48.759         | 99684967         |
| 33.683         | 51.241         | 104760086        |
| <b>Totals</b>  | <b>100.000</b> | <b>204445053</b> |
